# Supplementary material
Source: Royal Society of Chemistry journal article supplement (doi:10.1039/d6ea00019c)
Supplement: d6ea00019c16.pdf [file d6ea00019c16.pdf]

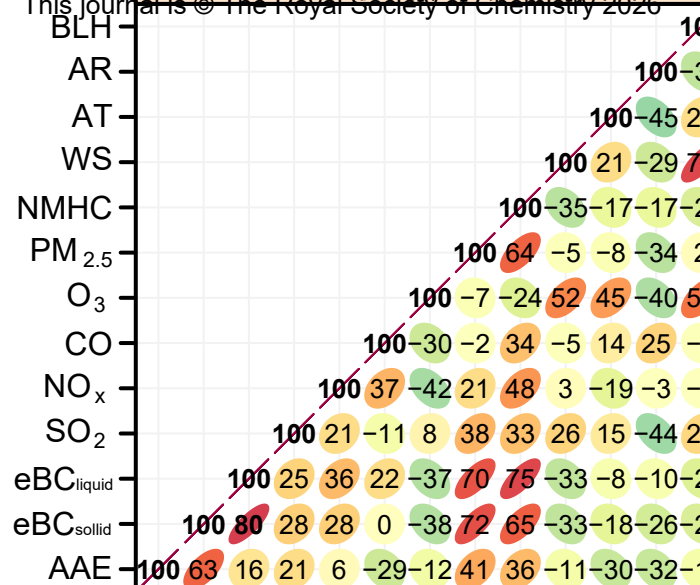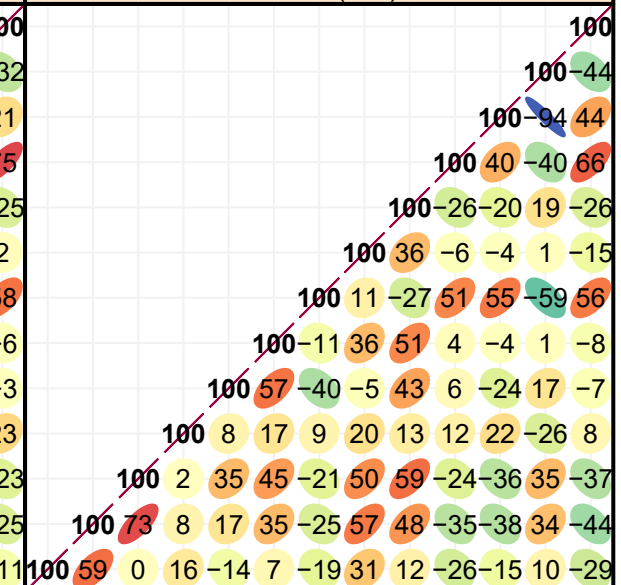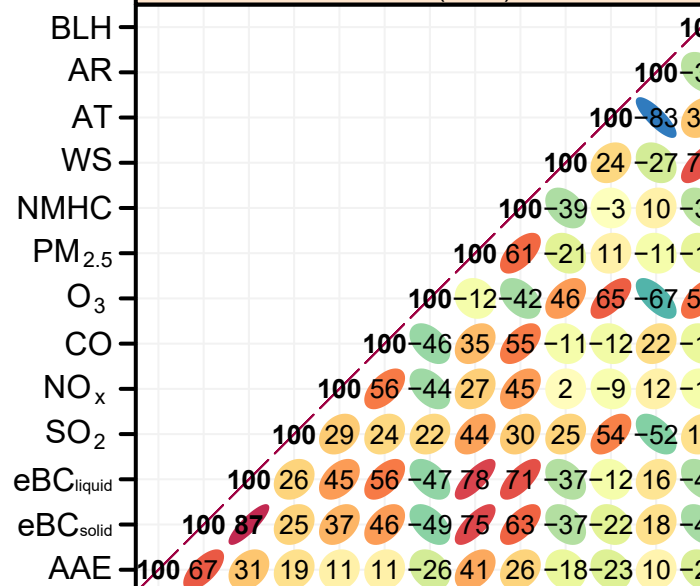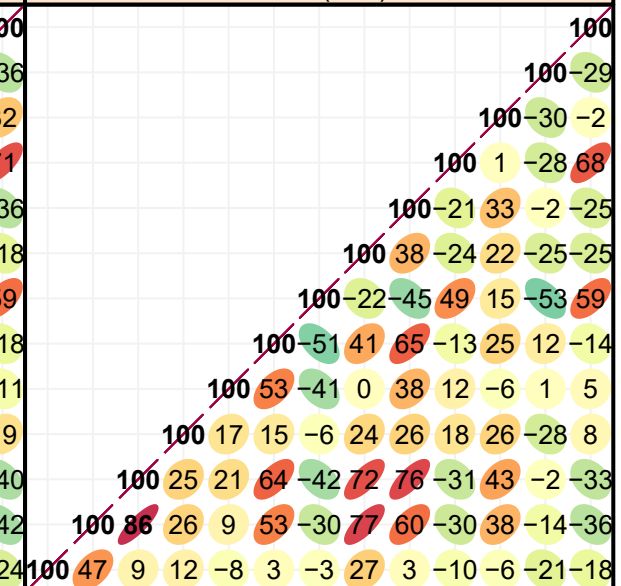

AAE eBC<sub>solid</sub> eBC<sub>liquid</sub> SO<sub>2</sub> NO<sub>x</sub> CO O<sub>3</sub> PM<sub>2.5</sub> NMHC WS AT AR BLH AAE eBC<sub>solid</sub> eBC<sub>liquid</sub> SO<sub>2</sub> NO<sub>x</sub> CO O<sub>3</sub> PM<sub>2.5</sub> NMHC WS AT AR BLH
