# Supplementary material
Source: Royal Society of Chemistry journal article supplement (doi:10.1039/d6ea00019c)
Supplement: d6ea00019c20.pdf [file d6ea00019c20.pdf]

*Supplement of*

**Source Apportionment and Driving Mechanisms of Black Carbon in a Mountainous Megacity: Insights from Urban–Suburban Observations in Chongqing, China**

**Yimei Wang**<sup>a, b, ★</sup>, **Junjie Ding**<sup>a, b, c, ★</sup>, **Jie Zhao**<sup>a, b</sup>, **Peng Zhang**<sup>a, c</sup>, **Jun Chen**<sup>a</sup>,  
**Wei Huang**<sup>a, c</sup>, **Xin Zhang**<sup>a, b</sup>, **Xi Pu**<sup>a, c</sup>, **Mengyao Wang**<sup>a, c</sup>, **Pengrui Fu**<sup>a</sup>, **Jiayan Yu**<sup>a, b, c \*</sup>

Correspondence to: Jiayan Yu ([jiayan.yu@klapc.org.cn](mailto:jiayan.yu@klapc.org.cn))

**Table S1.** The comparison of BC concentrations (unit:  $\mu\text{g}\cdot\text{m}^{-3}$ ) in megacities worldwide.

| Country | Sampling location | Site type | Sampling period      | Equipment | BC $\pm$ 1SD<br>( $\mu\text{g}\cdot\text{m}^{-3}$ ) | Reference |
|---------|-------------------|-----------|----------------------|-----------|-----------------------------------------------------|-----------|
| Italy   | Milan             | Urban     | Jul 2017 to Mar 2018 | AE31      | 1.921 $\pm$ 0.876                                   | 1         |
|         |                   | Suburban  | Jul 2017 to Mar 2018 | AE51      | 2.763 $\pm$ 1.05                                    |           |
| UK      | London            | Urban     | Jan 2013 to Apr 2015 | AE22      | 6.6                                                 | 2         |
|         |                   | Suburban  | Jan 2013 to Apr 2015 | MAAP      | 1.2                                                 |           |
| Spain   | Madrid            | Urban     | Dec 2014 to Nov 2015 | AE33      | 3.70 $\pm$ 3.73                                     | 3         |
|         |                   | Urban     | Dec 2014 to Nov 2015 | AE33      | 2.33 $\pm$ 2.96                                     |           |
|         |                   | Suburban  | Dec 2014 to Nov 2015 | AE33      | 2.61 $\pm$ 5.04                                     |           |
| France  | Paris             | Urban     | Dec 2017 to 2019     | AE33      | 2.5 $\pm$ 1.7                                       | 4         |
|         |                   | Suburban  | Dec 2017 to 2019     | AE33      | 1.8 $\pm$ 2.4                                       |           |
|         |                   | Urban     | May 2003 to Dec 2003 | AE21      | 2.04                                                |           |
| USA     | New york          | Urban     | 2004 annual          | AE21      | 1.99                                                | 5         |
|         |                   | Urban     | 2005 annual          | AE21      | 1.72                                                |           |
|         |                   | Urban     | 2006 annual          | AE21      | 1.69                                                |           |
|         |                   | Urban     | 2007 annual          | AE21      | 1.67                                                |           |
|         |                   | Urban     | 2008 annual          | AE21      | 1.71                                                |           |
|         |                   | Urban     | 2009 annual          | AE21      | 1.81                                                |           |
|         |                   | Urban     | 2010 annual          | AE21      | 1.61                                                |           |
| Urban   | 2011 annual       | AE21      | 1.7                  |           |                                                     |           |

|        |             |          |                      |         |            |    |
|--------|-------------|----------|----------------------|---------|------------|----|
|        |             | Urban    | 2012 annual          | AE21    | 1.39       |    |
|        |             | Suburban | May 2004 to Dec 2004 | AE21    | 0.7        |    |
|        |             | Suburban | 2005 annual          | AE21    | 0.76       |    |
|        |             | Suburban | 2006 annual          | AE21    | 0.71       |    |
|        |             | Suburban | 2007 annual          | AE21    | 0.72       |    |
|        |             | Suburban | 2008 annual          | AE21    | 0.67       |    |
|        |             | Suburban | 2009 annual          | AE21    | 0.57       |    |
|        |             | Suburban | 2010 annual          | AE21    | 0.46       |    |
|        |             | Suburban | 2011 annual          | AE21    | 0.58       |    |
|        |             | Suburban | 2012 annual          | AE21    | 0.57       |    |
|        | Los Angeles | Urban    | Mar 2016 to Feb 2017 | AE33    | 0.64       | 6  |
|        |             | Suburban | Mar 2016 to Feb 2017 | AE33    | 1.04       |    |
| Mexico | Mexico city | Urban    | 2015 annual          | AE33    | 2.52       | 7  |
|        |             | Suburban | 2015 annual          | AE33    | 0.75       |    |
| Japan  | Tokyo       | Urban    | Apr 2016 to Mar 2017 | TOT/TOR | 1.18       | 8  |
|        |             | Urban    | Apr 2016 to Mar 2017 | TOT/TOR | 0.66       |    |
|        |             | Suburban | Apr 2016 to Mar 2017 | TOT/TOR | 1.59       |    |
| India  | Delhi       | Suburban | Apr 2015 to Mar 2016 | AE33    | 7.2 ± 0.3  | 9  |
|        |             | Urban    | Apr 2016 to Feb 2017 | AE51    | 21.33      | 10 |
| China  | Shanghai    | Urban    | Jun 2016 to Jun 2017 | AE31    | 1.17± 0.61 | 11 |
|        |             | Suburban | Jun 2016 to Jun 2017 | AE31    | 2.09± 0.97 |    |
|        | Beijing     | Suburban | 2013 annual          | OR      | 6.42±4.35  | 12 |
|        |             | Suburban | 2014 annual          | OR      | 7.86±4.71  |    |
|        |             | Suburban | 2015 annual          | OR      | 6.58±4.22  |    |
|        |             | Suburban | 2016 annual          | OR      | 5.91±3.51  |    |

|           |          |                      |      |             |            |
|-----------|----------|----------------------|------|-------------|------------|
|           | Suburban | 2017 annual          | OR   | 5.28±3.11   |            |
|           | Suburban | 2018 annual          | OR   | 4.59±2.78   |            |
|           | Suburban | 2019 annual          | OR   | 3.7±2.22    |            |
|           | Urban    | 2012 annual          | AE22 | 6.25±5.73   | 13         |
|           | Urban    | 2013 annual          | AE22 | 5.8±5.5     |            |
|           | Urban    | 2014 annual          | AE22 | 5.5±5.4     |            |
|           | Urban    | 2015 annual          | AE22 | 4.6±4.9     |            |
|           | Urban    | 2016 annual          | AE22 | 3.9±4.2     |            |
|           | Urban    | 2017 annual          | AE22 | 3.1±3.5     |            |
|           | Urban    | 2018 annual          | AE22 | 2.4±3.1     |            |
|           | Urban    | 2019 annual          | AE22 | 2±2.8       |            |
|           | Urban    | 2020 annual          | AE22 | 1.8±1.54    |            |
| Guangzhou | Urban    | Dec 2020 to Sep 2021 | TOT  | 1.32 ± 0.77 | 14         |
|           | Suburban | Dec 2020 to Sep 2021 | TOT  | 1.12 ± 0.44 |            |
| Shenzhen  | Urban    | Jan 2014 to Jun 2015 | AE31 | 2.58±1.91   | 15         |
|           | Suburban | Jan 2014 to Jun 2015 | AE31 | 1.12±0.90   |            |
| Chongqing | Suburban | 2024 annual          | AE33 | 2.83 ± 1.85 | This study |
|           | Urban    | 2024 annual          | AE33 | 2.39 ± 1.31 |            |

---

AE: Aethalometer; MAAP: Multi Angle Absorption Photometer; COSMOS: Continuous Soot Monitoring System; SP2: Single Particle Soot Photometer; TOT: Thermal-Optical Transmittance method; OR: Optical Reflectance method.

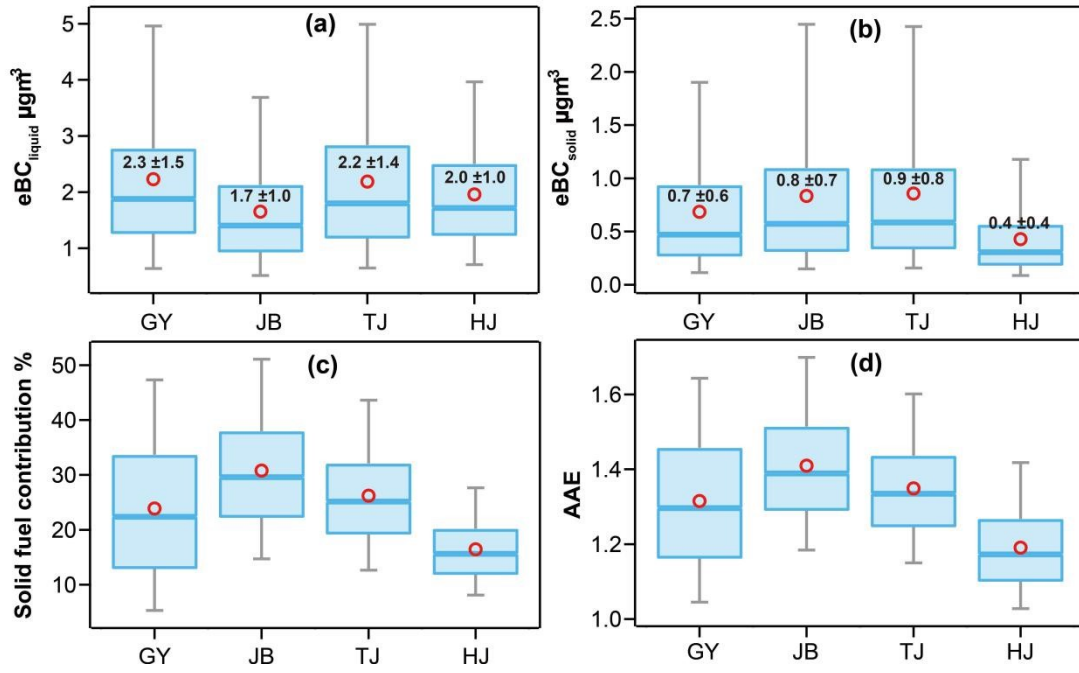

**Fig. S1.** Box plots of  $eBC_{\text{liquid}}$ ,  $eBC_{\text{solid}}$ , solid fuel contribution, and AAE at four sites during the sampling period.

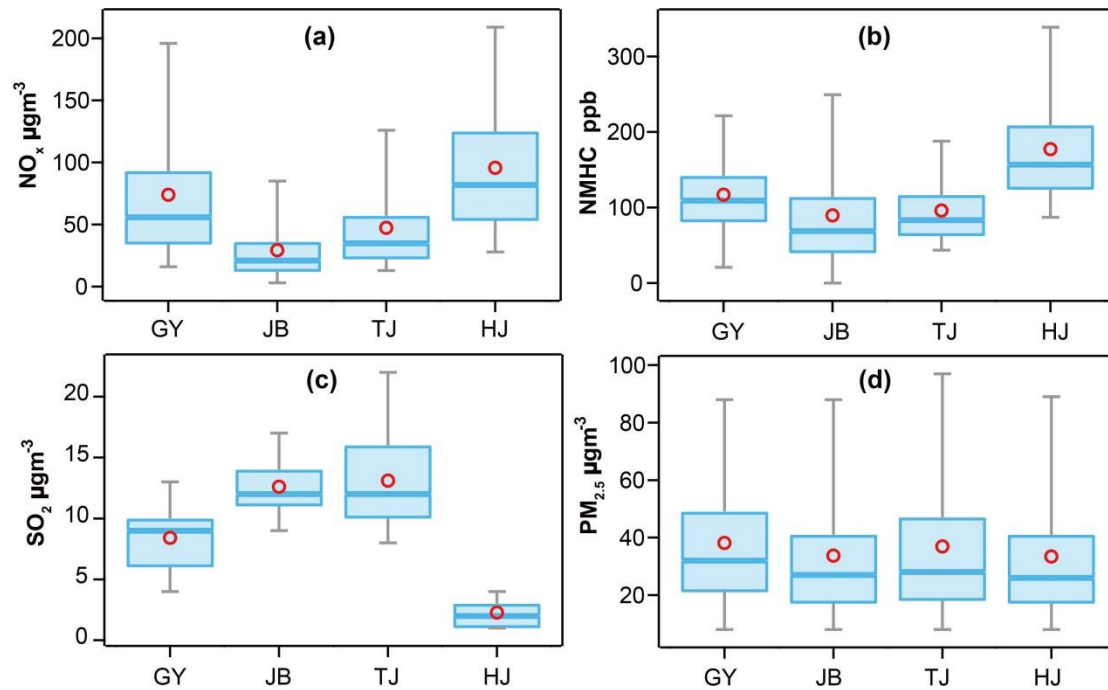

**Fig. S2.** Box plots of NO<sub>x</sub>, NMHC, SO<sub>2</sub>, and PM<sub>2.5</sub> at four sites during the sampling period.

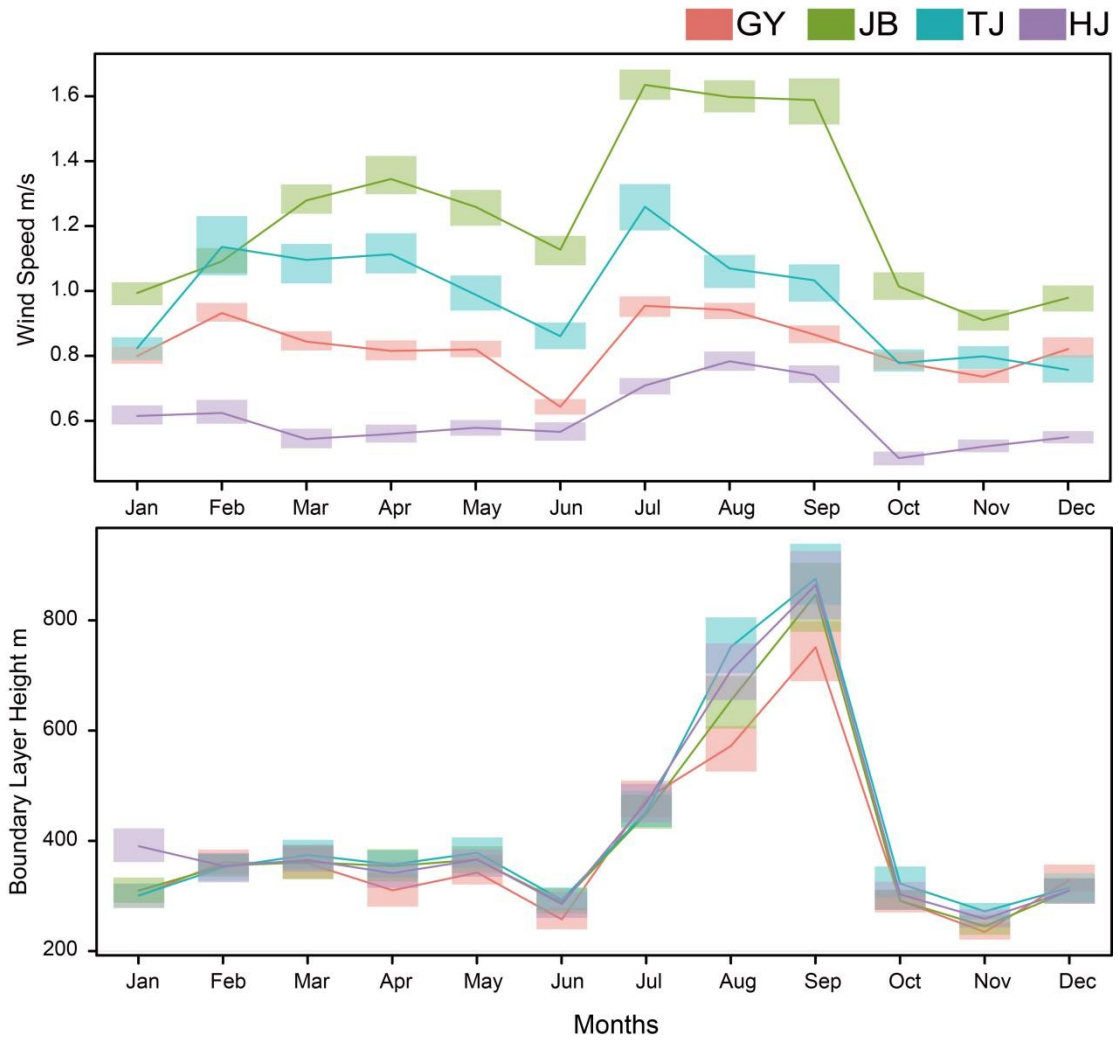

**Fig. S3.** Box plots of monthly variations in Wind speed (WS) and boundary layer height (BLH) across the sites.

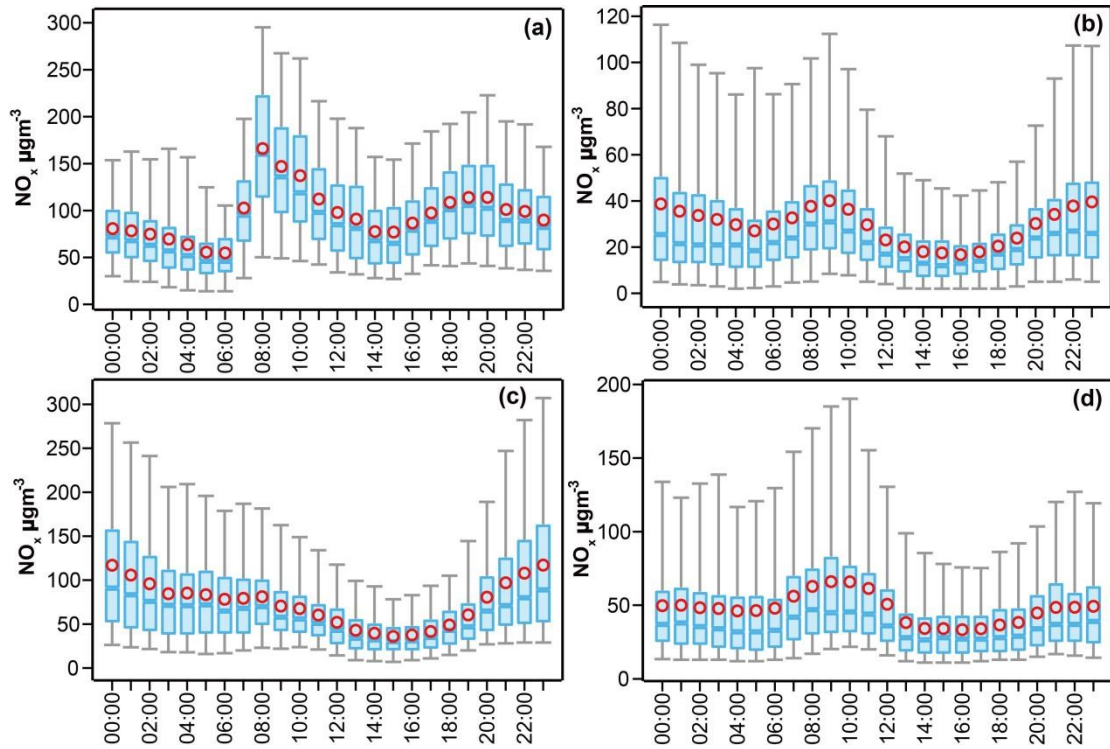

**Fig. S4.** Mean hourly  $\text{NO}_x$  concentrations at (a) HJ, (b) JB, (c) GY, and (d) TJ sites.

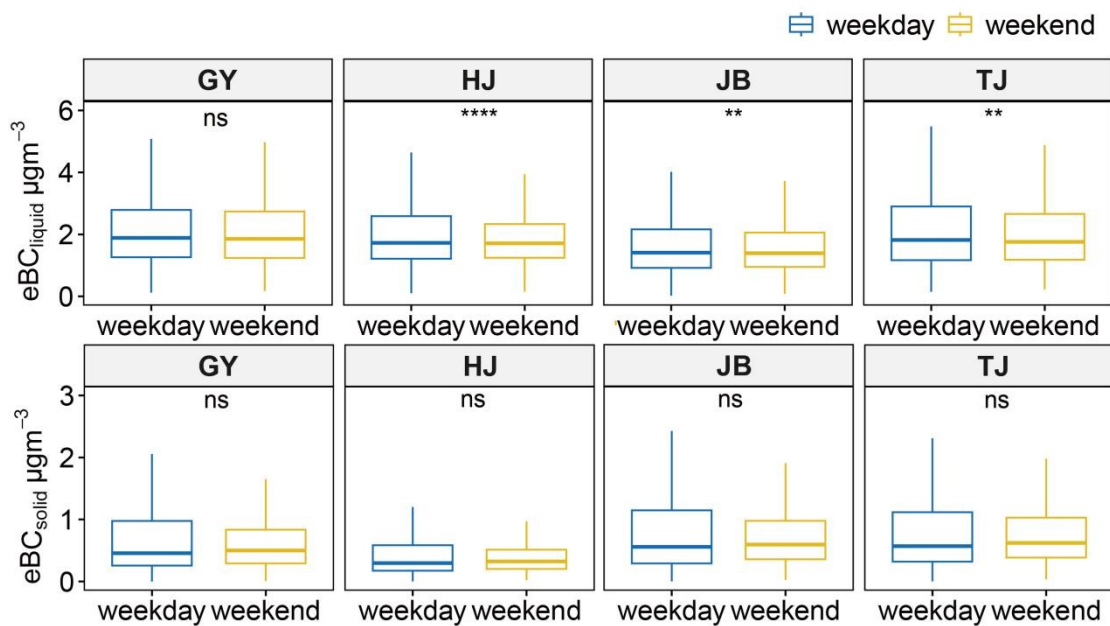

**Fig. S5.** Statistical results of  $\text{eBC}_{\text{liquid}}$  and  $\text{eBC}_{\text{solid}}$  from the independent samples t-test comparing weekday and weekend data. The blue box plot represents weekday data, while the yellow box plot represents weekend data.

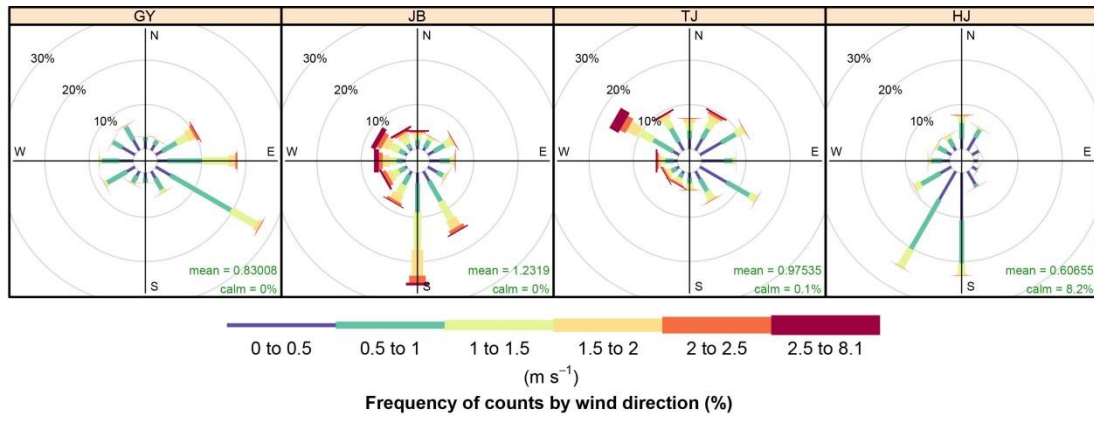

**Fig. S6.** Wind rose diagrams for four sites, showing the distribution of wind direction and speed during the sampling period.

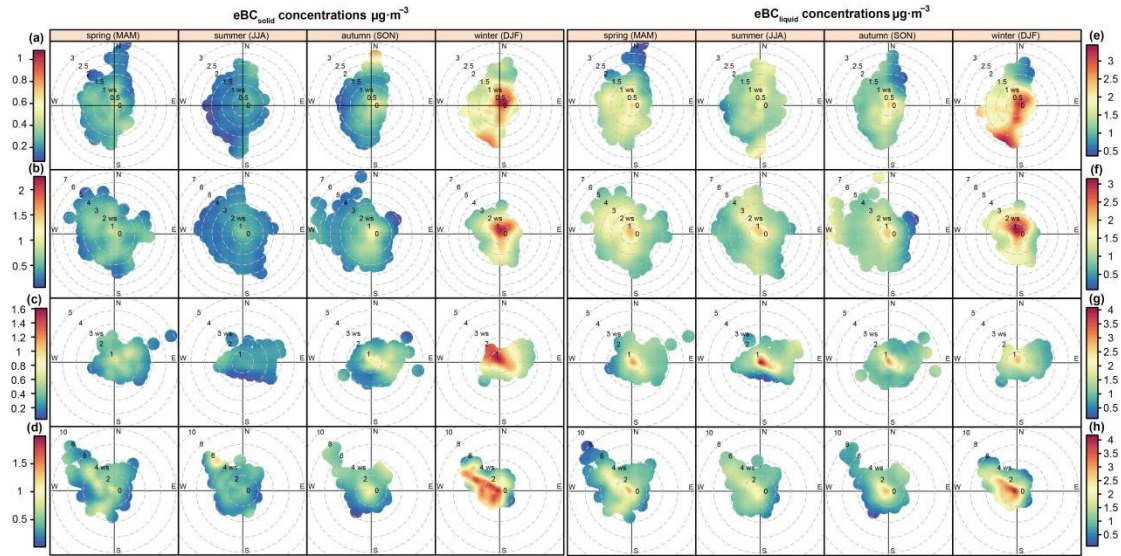

**Fig. S7.** Polar plots of  $eBC_{solid}$  and  $eBC_{liquid}$  for seasonal variations at all sites. (a)

$eBC_{solid}$  at HJ, (b)  $eBC_{solid}$  at JB, (c)  $eBC_{solid}$  at GY, (d)  $eBC_{solid}$  at TJ, (e)  $eBC_{liquid}$  at

HJ, (f)  $eBC_{liquid}$  at JB, (g)  $eBC_{liquid}$  at GY, and (h)  $eBC_{liquid}$  at TJ.

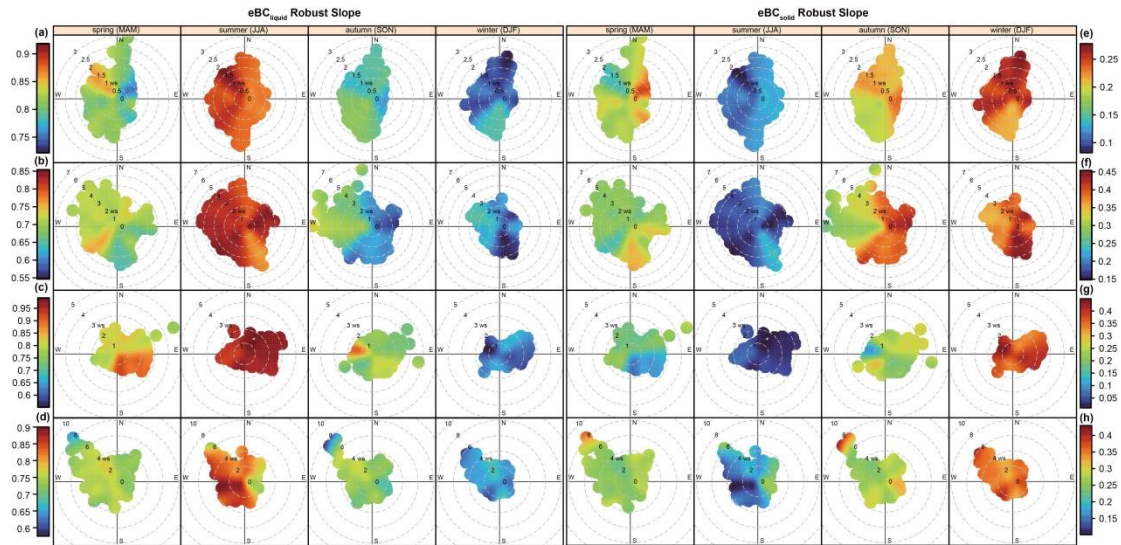

**Fig. S8.** Polar plots of the robust regression slope between  $eBC_{liquid}$  and  $eBC$ , and

between  $eBC_{solid}$  and  $eBC$  for seasonal variations at all sites. (a)  $eBC_{liquid}$  at HJ, (b)

$eBC_{liquid}$  at JB, (c)  $eBC_{liquid}$  at GY, (d)  $eBC_{liquid}$  at TJ, (e)  $eBC_{solid}$  at HJ, (f)  $eBC_{solid}$  at

JB, (g)  $eBC_{solid}$  at GY, and (h)  $eBC_{solid}$  at TJ.

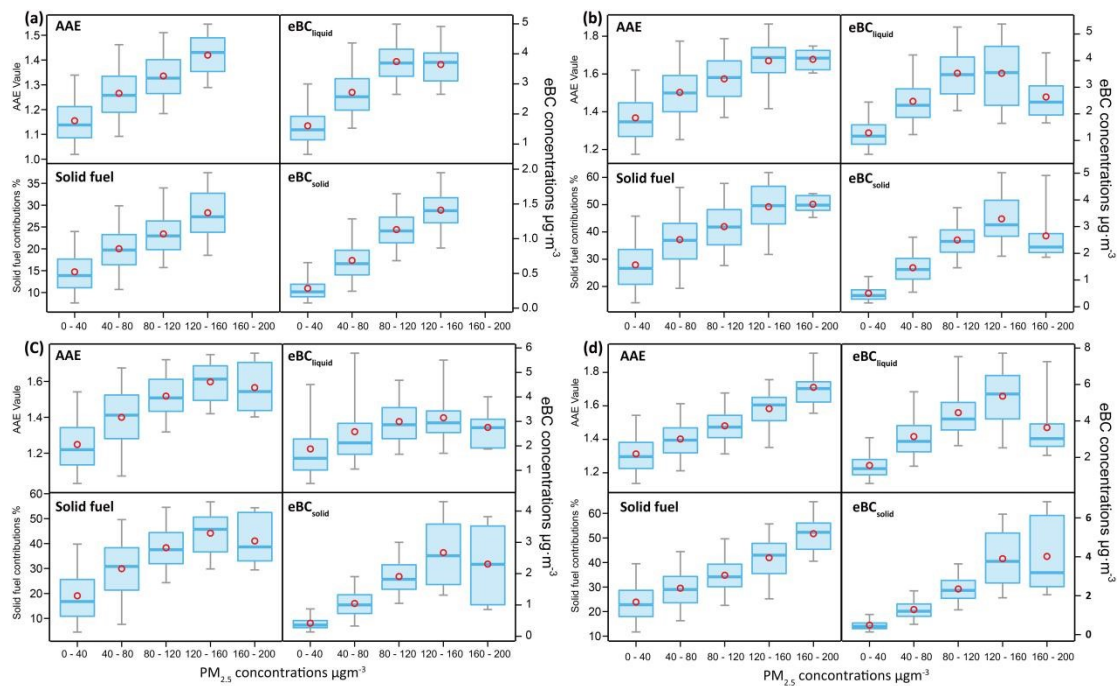

**Fig. S9.** Box plots of AAE,  $eBC_{\text{liquid}}$ , solid fuel contribution, and  $eBC_{\text{solid}}$  as a function of  $PM_{2.5}$  concentration at (a) HJ, (b) JB, (c) GY, and (d) TJ sites.

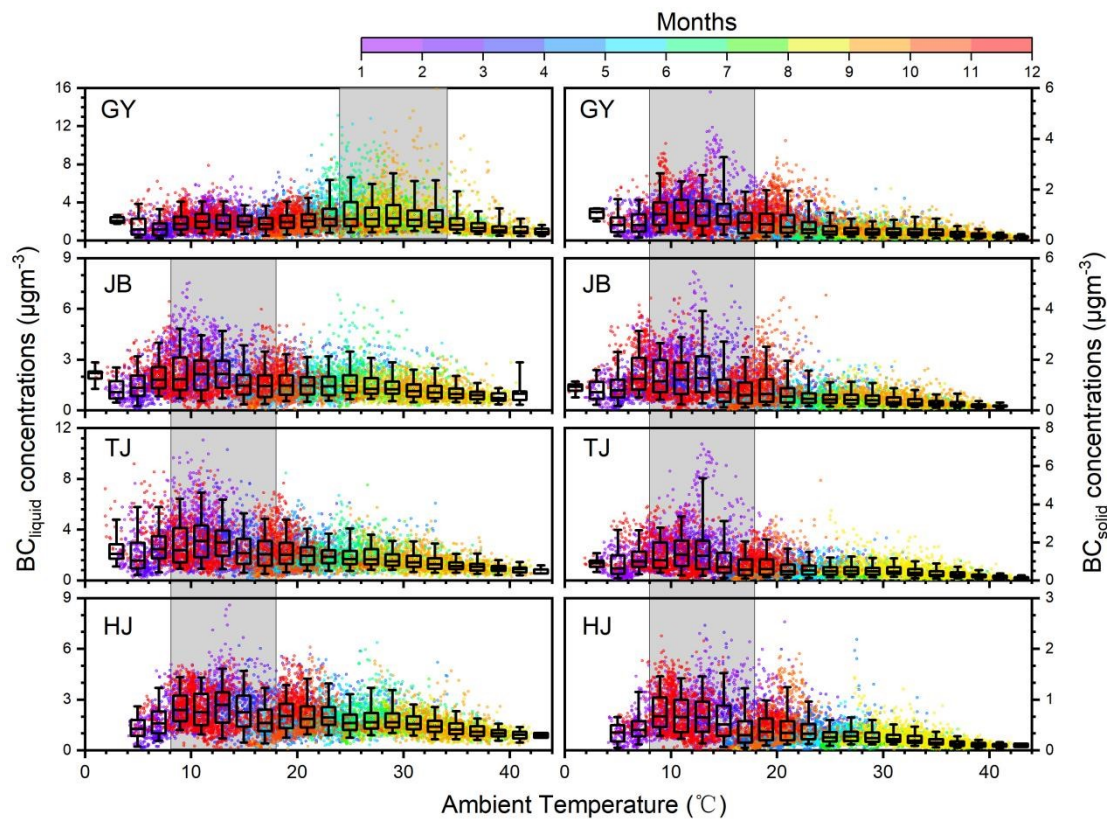

**Fig. S10.** Scatter plots and box plots of  $eBC$  concentration as a function of temperature across the sites.

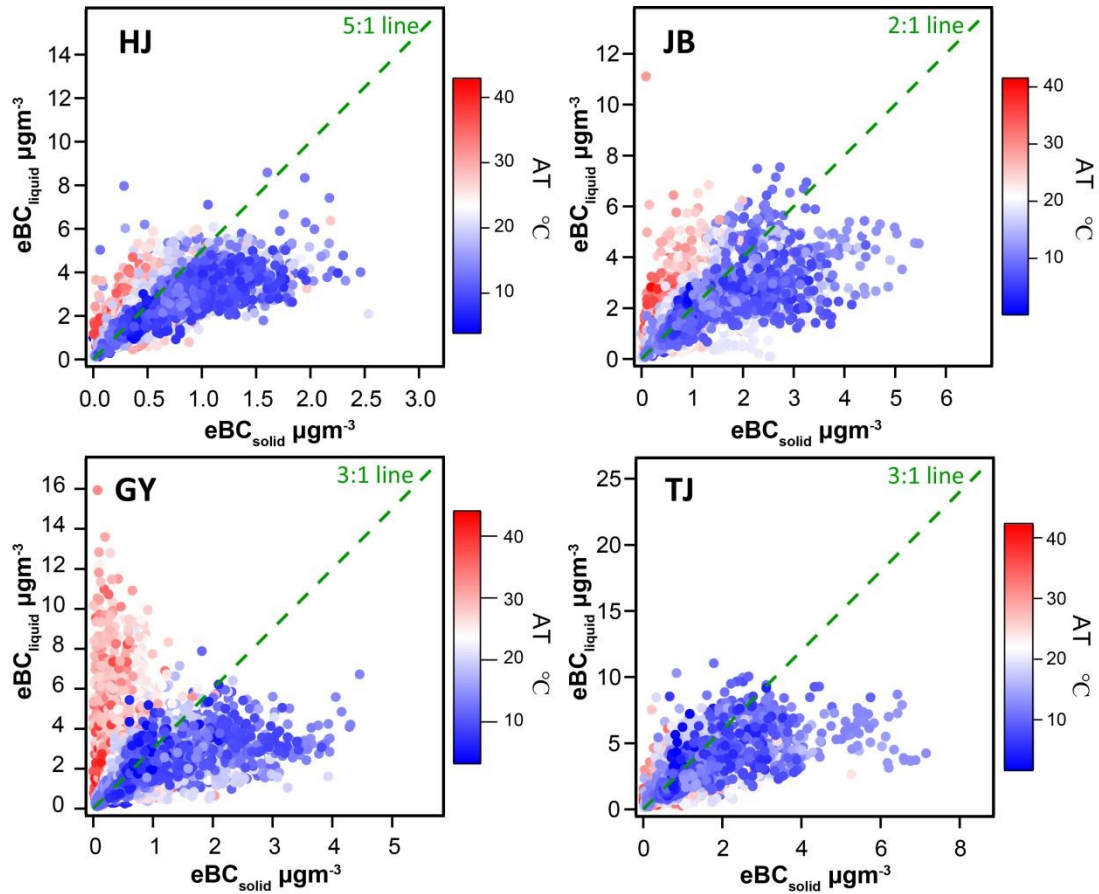

Fig. S11. Temperature dependence of  $eBC_{\text{liquid}}$  and  $eBC_{\text{solid}}$  at each site.

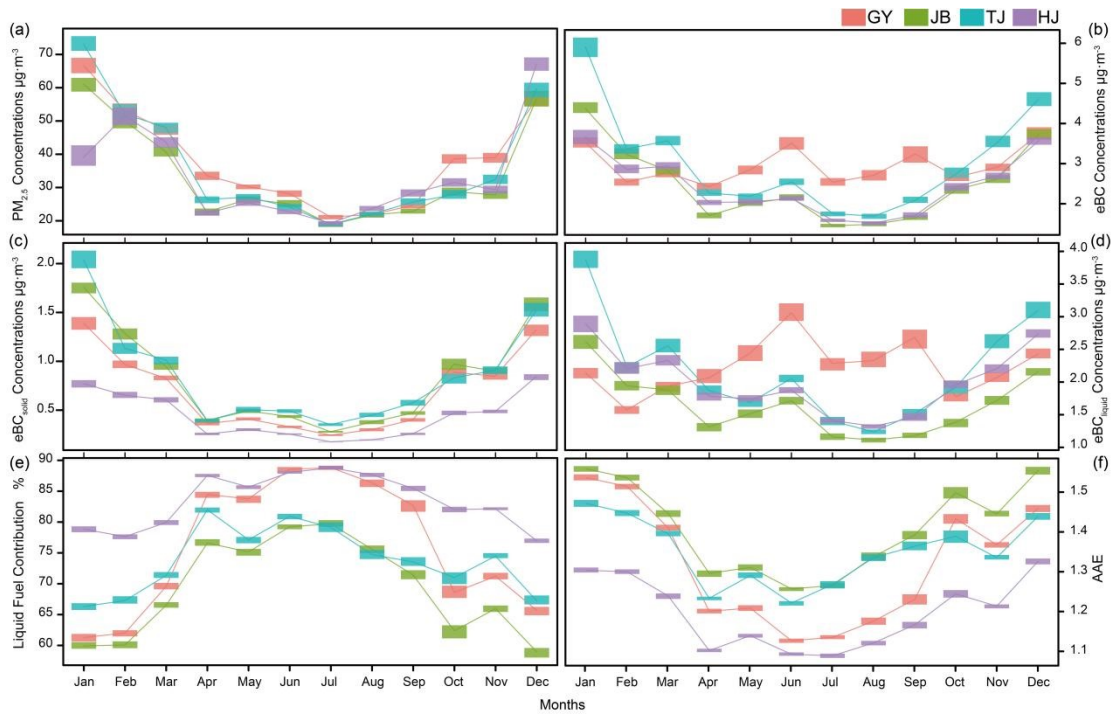

**Fig. S12.** Box plots of monthly variations in (a)  $PM_{2.5}$ , (b)  $eBC_{total}$ , (c)  $eBC_{solid}$ , (d)  $eBC_{liquid}$ , (e) liquid fuel contribution, and (f) AAE across the sites.

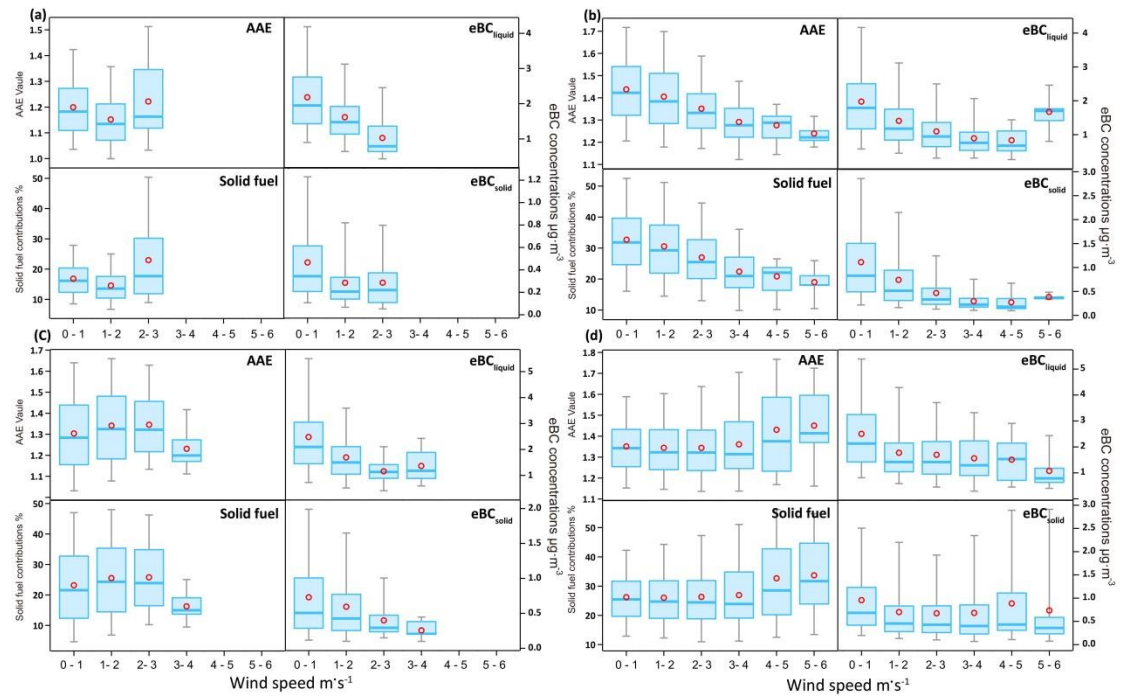

**Fig. S13.** Box plots of AAE,  $eBC_{liquid}$ , solid fuel contribution, and  $eBC_{solid}$  as a function of wind speed at (a) HJ, (b) JB, (c) GY, and (d) TJ sites.

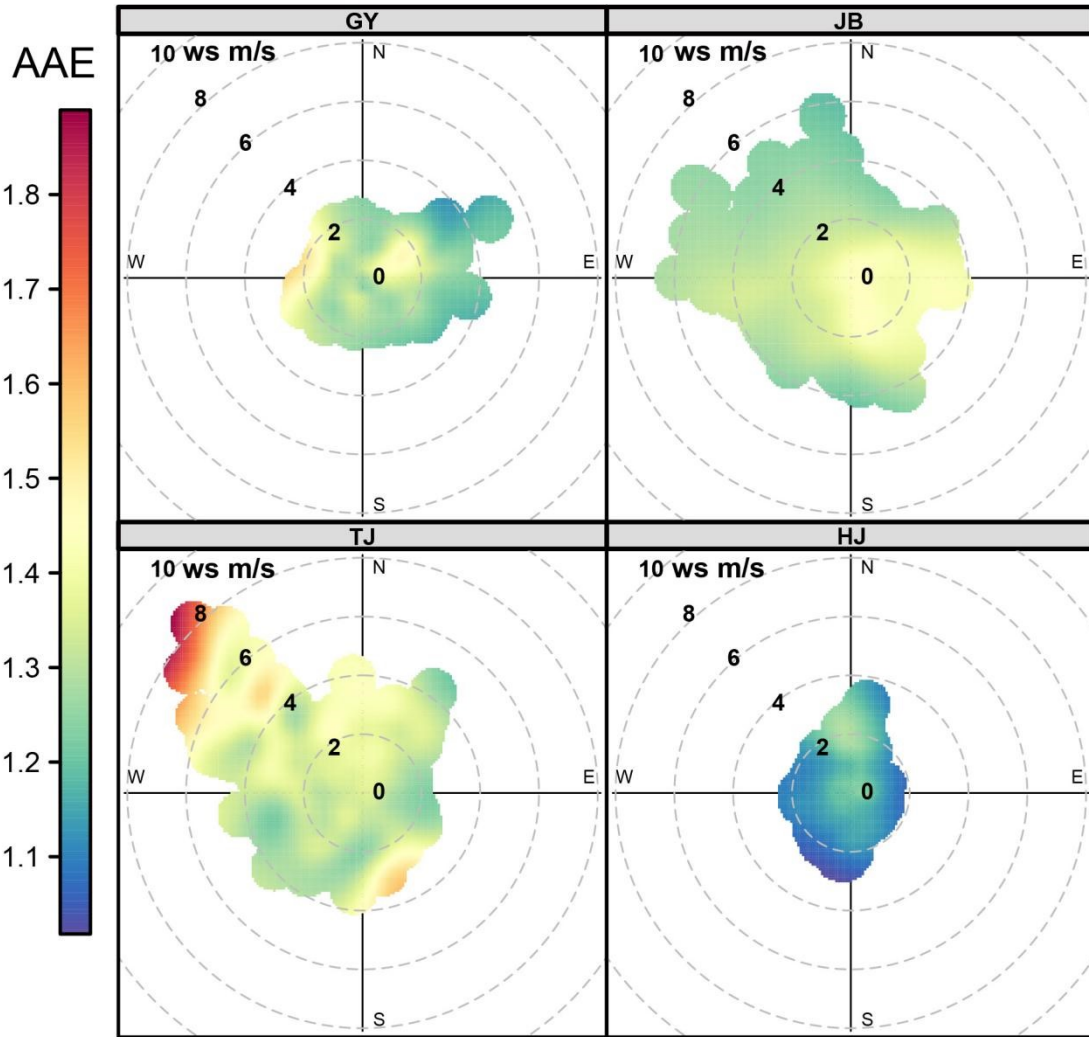

**Fig. S14.** Polar plots of AAE at each sites.

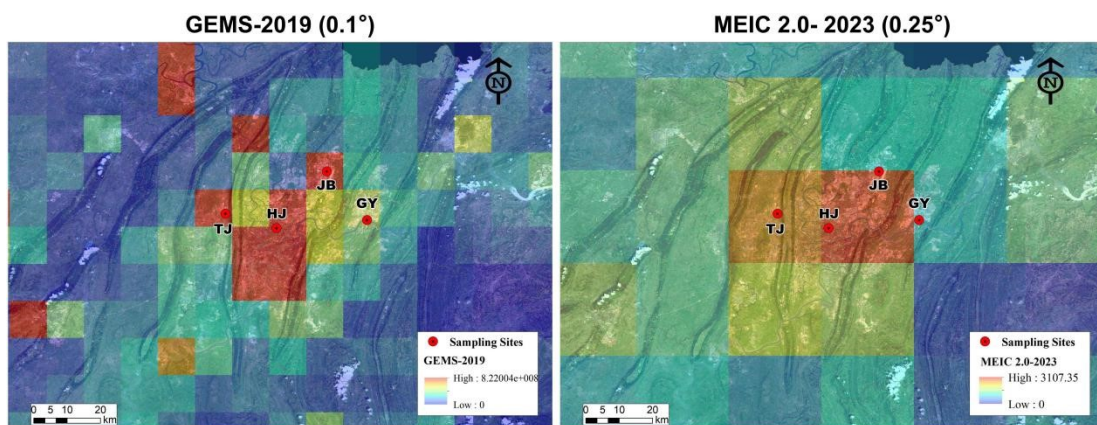

**Fig. S15.** Comparison of gridded BC emissions over the study region from GEMS (2019,  $0.1^\circ \times 0.1^\circ$ ) and MEIC v2.0 (2023,  $0.25^\circ \times 0.25^\circ$ ).

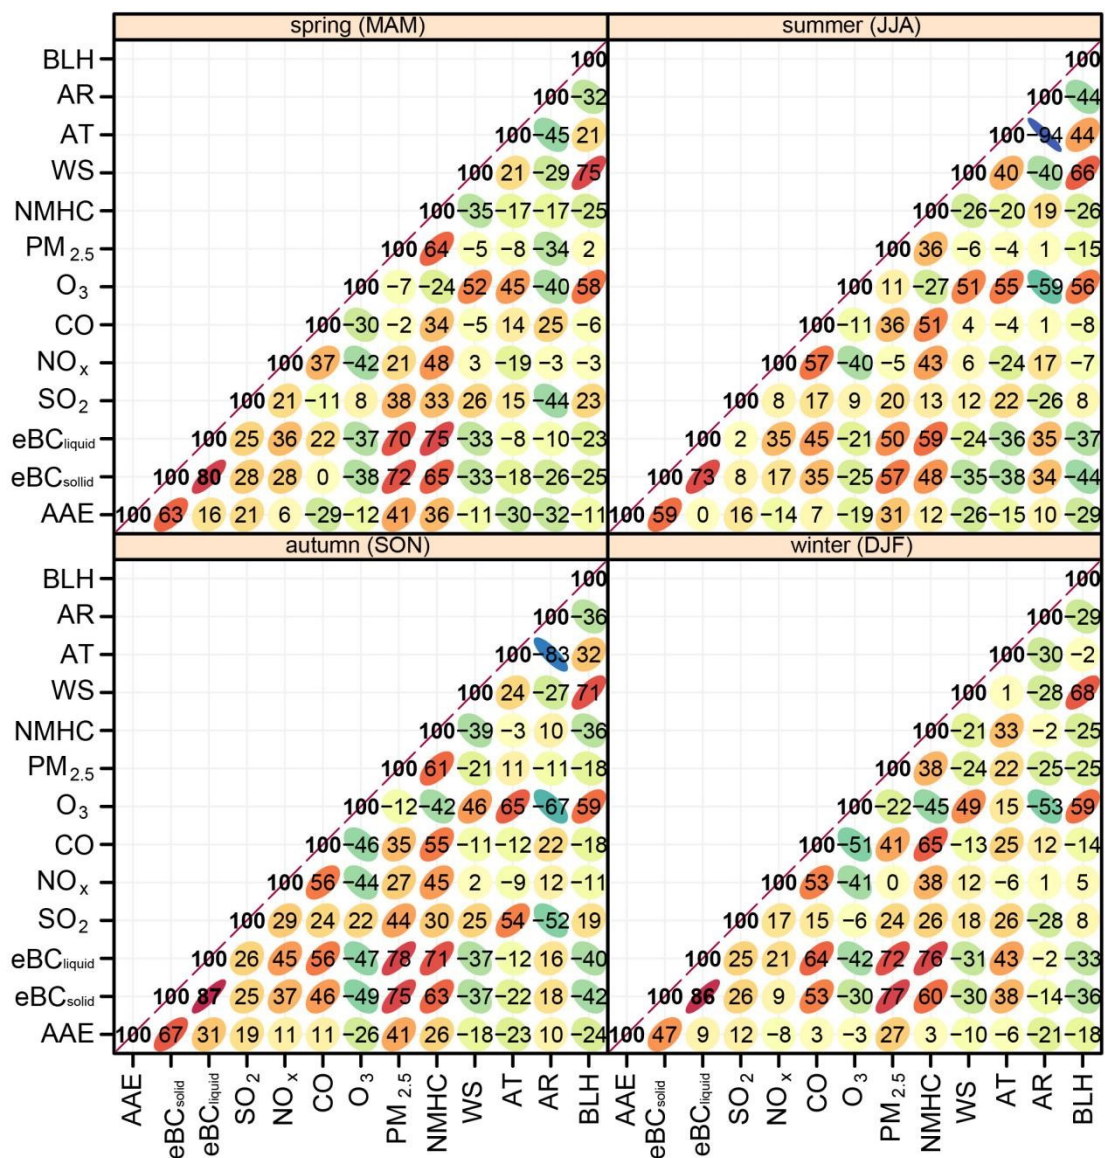

Fig. S16. Seasonal correlation matrices between the pollutants at the HJ site.

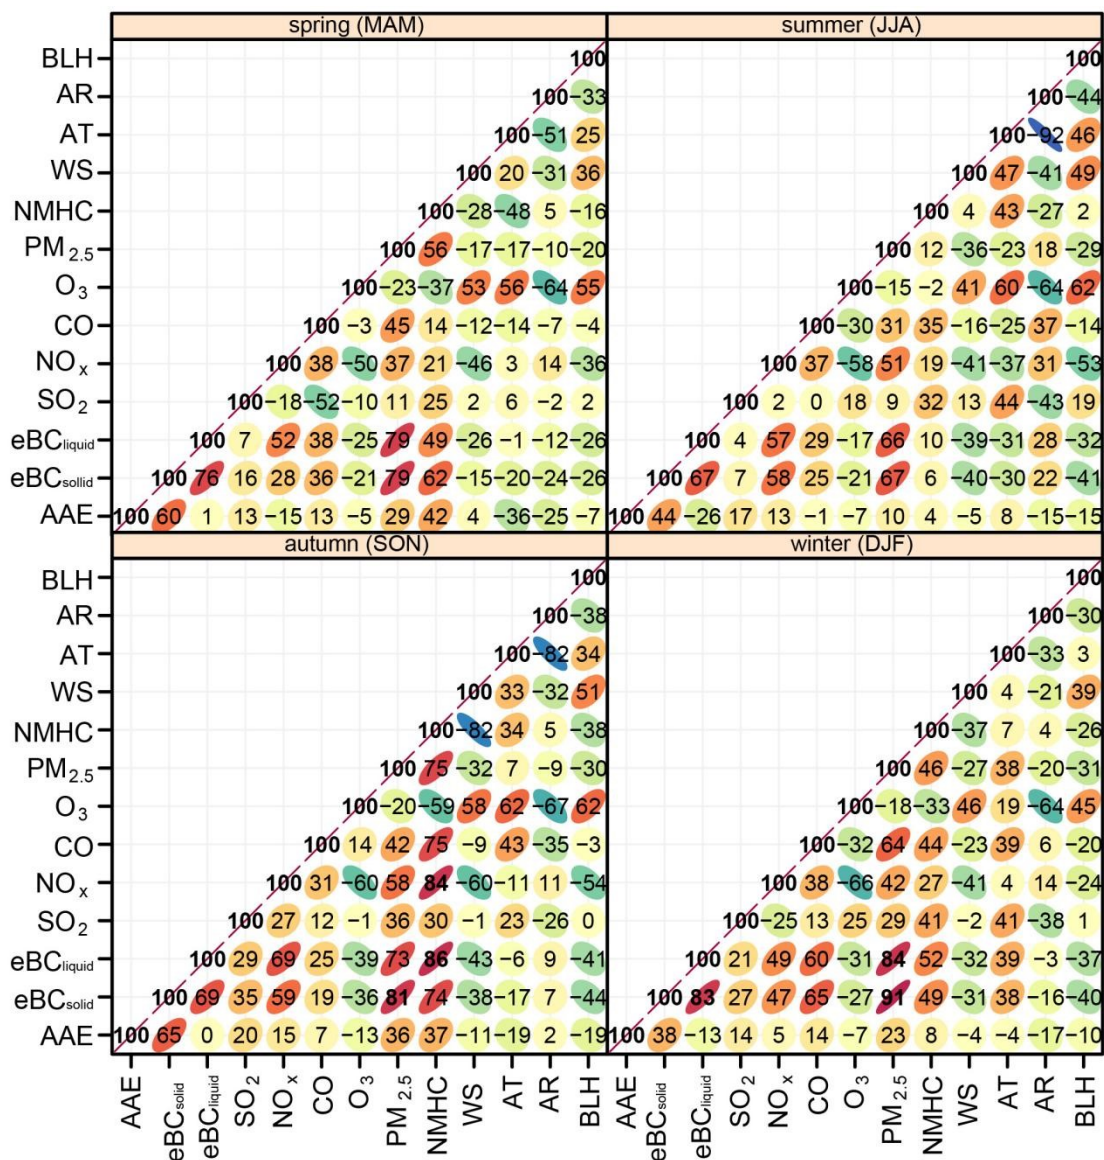

Fig. S17. Seasonal correlation matrices between the pollutants at the JB site.

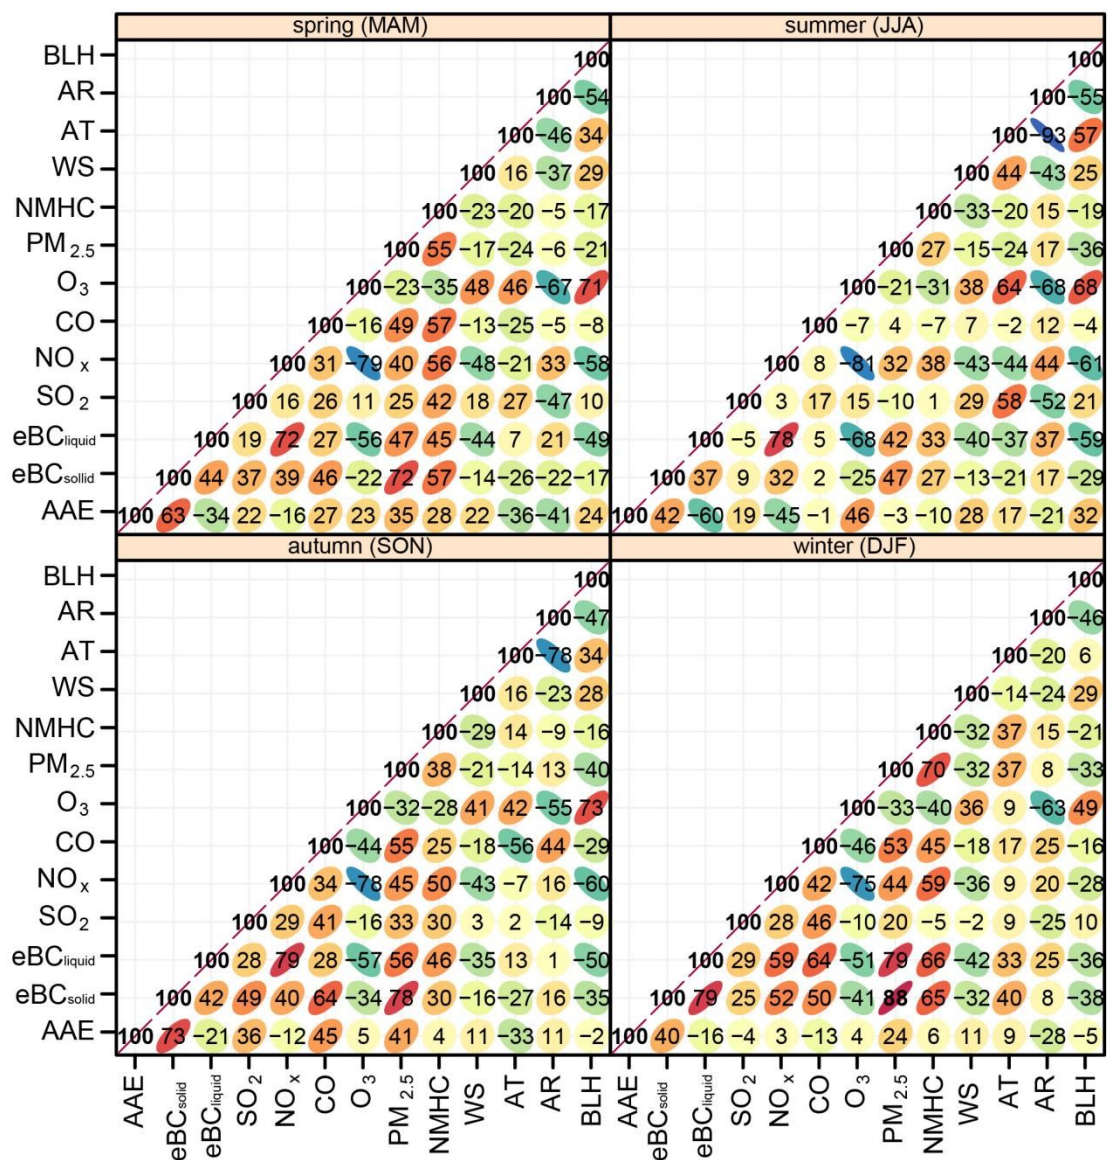

Fig. S18. Seasonal correlation matrices between the pollutants at the GY site.

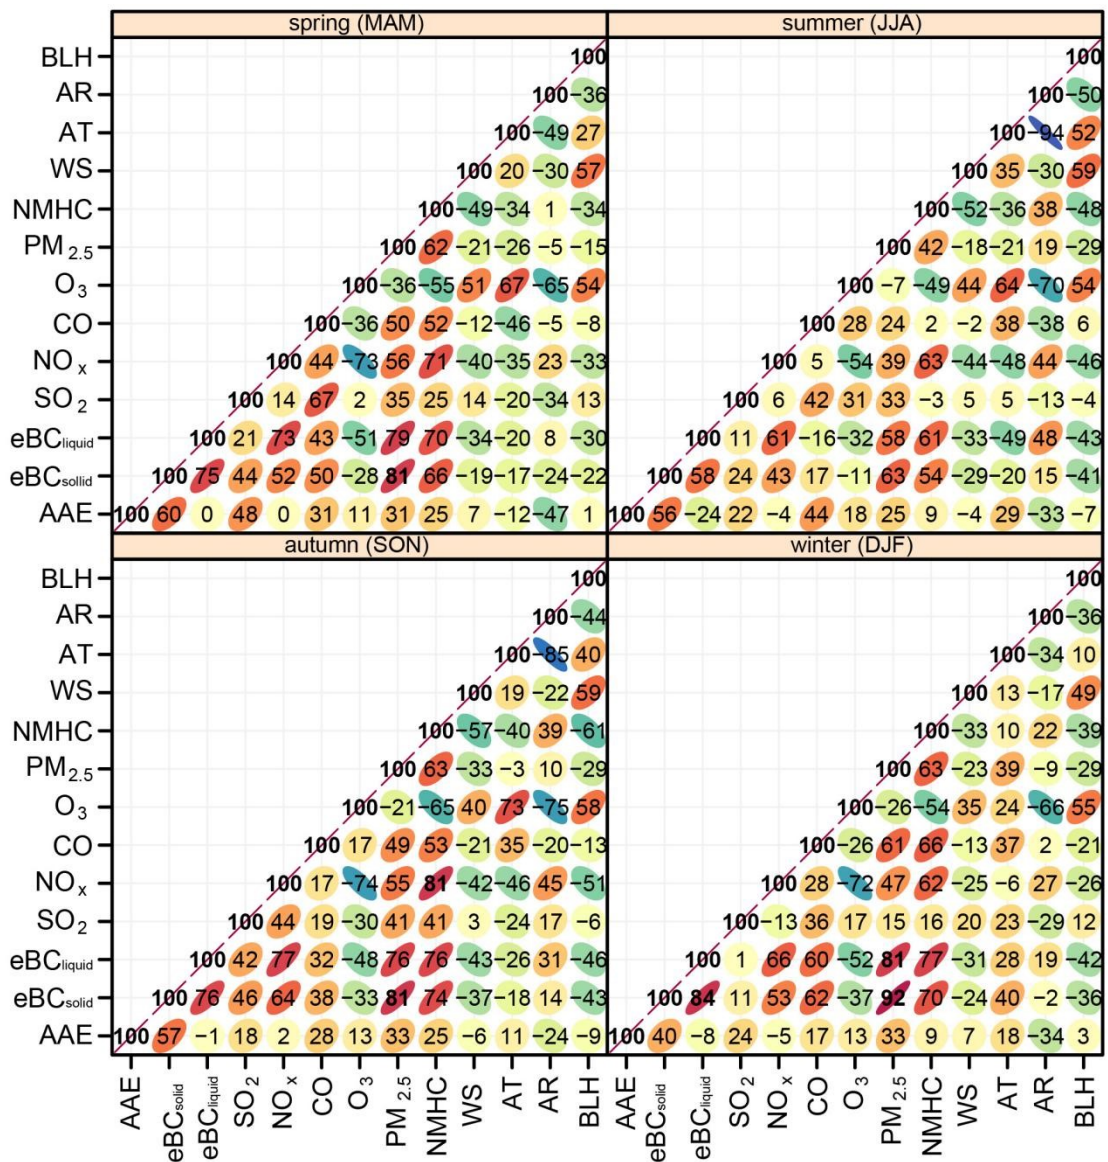

**Fig. S19.** Seasonal correlation matrices between the pollutants at the TJ site.

**Table S2.** GuoYuan Port Cargo Throughput recently (unit: Million Tons, Mt).

| Time period     | Cargo throughput | Reference                                                                                                                                               |
|-----------------|------------------|---------------------------------------------------------------------------------------------------------------------------------------------------------|
| Jan to Nov 2024 | 26.006 Mt        | <a href="https://www.cq.gov.cn/zt/xblhxt/drdxw/202412/t20241218_13902977.html">https://www.cq.gov.cn/zt/xblhxt/drdxw/202412/t20241218_13902977.html</a> |
| Jan to Jun 2024 | 12.909 Mt        | <a href="https://jtj.cq.gov.cn/sy_240/bmdt/202407/t20240712_13902977.html">https://jtj.cq.gov.cn/sy_240/bmdt/202407/t20240712_13902977.html</a>         |

[718\\_13381096.html](#)

Jul to Nov 2024 2.619 Mt per month derived from above data

Jan to Jun 2024 2.151 Mt per month derived from above data

Jan-25 2.146 Mt

<https://www.cqgyzone.com/home/articles/1379.h>

[tml](#)

[https://jtj.cq.gov.cn/sy\\_240/bmdt/202504/t20250](https://jtj.cq.gov.cn/sy_240/bmdt/202504/t20250)

Jan to Mar 2025 2.214 Mt per month

[411\\_14514839.html](#)

---

## References

- 1 A. Mousavi, M. H. Sowlat, C. Lovett, M. Rauber, S. Szidat, R. Boffi, A. Borgini, C. De Marco, A. A. Ruprecht and C. Sioutas, Source apportionment of black carbon (BC) from fossil fuel and biomass burning in metropolitan Milan, Italy, *Atmospheric Environment*, 2019, **203**, 252–261.
- 2 K. P. Wyche, R. L. Cordell, L. Smith M, K. L. Smallbone, P. Lyons, S. M. L. Hama, P. S. Monks, J. Staelens, J. Hofman, C. Stroobants, E. Roekens, G. P. A. Kos, E. P. Weijers, P. Panteliadis and M. B. A. Dijkema, The spatio-temporal evolution of black carbon in the North-West European ‘air pollution hotspot’, *Atmospheric Environment*, 2020, **243**, 117874.
- 3 M. Becerril-Valle, E. Coz, A. S. H. Prévôt, G. Močnik, S. N. Pandis, A. M. Sánchez De La Campa, A. Alastuey, E. Díaz, R. M. Pérez and B. Artíñano, Characterization of atmospheric black carbon and co-pollutants in urban and rural areas of Spain, *Atmospheric Environment*, 2017, **169**, 36–53.
- 4 M. Savadkoohi, M. Pandolfi, C. Reche, J. V. Niemi, D. Mooibroek, G. Titos, D. C. Green, A. H. Tremper, C. Hueglin, E. Liakakou, N. Mihalopoulos, I. Stavroulas, B. Artíñano, E. Coz, L. Alados-Arboledas, D. Beddows, V. Riffault, J. F. De Brito, S. Bastian, A. Baudic, C. Colombi, F. Costabile, B. Chazeau, N. Marchand, J. L. Gómez-Amo, V. Estellés, V. Matos, E. Van Der Gaag, G. Gille, K. Luoma, H. E. Manninen, M. Norman, S. Silvergren, J.-E. Petit, J.-P. Putaud, O. V. Rattigan, H. Timonen, T. Tuch, M. Merkel, K. Weinhold, S. Vratolis, J. Vasilescu, O. Favez, R. M. Harrison, P. Laj, A. Wiedensohler, P. K. Hopke, T. Petäjä, A. Alastuey and X. Querol, The variability of mass concentrations and source apportionment analysis of equivalent black carbon across urban Europe, *Environment International*, 2023, **178**, 108081.

- 5 O. V. Rattigan, K. Civerolo, P. Doraiswamy, H. D. Felton and P. K. Hopke, Long Term Black Carbon Measurements at Two Urban Locations in New York, *Aerosol Air Qual. Res.*, 2013, **13**, 1181–1196.
- 6 A. Mousavi, M. H. Sowlat, S. Hasheminassab, A. Polidori and C. Sioutas, Spatio-temporal trends and source apportionment of fossil fuel and biomass burning black carbon (BC) in the Los Angeles Basin, *Science of The Total Environment*, 2018, **640–641**, 1231–1240.
- 7 O. Peralta, A. Ortíz-Alvarez, R. Basaldud, N. Santiago, H. Alvarez-Ospina, K. De La Cruz, V. Barrera, M. De La Luz Espinosa, I. Saavedra, T. Castro, A. Martínez-Arroyo, V. H. Páramo, L. G. Ruíz-Suárez, F. A. Vazquez-Galvez and A. Gavilán, Atmospheric black carbon concentrations in Mexico, *Atmospheric Research*, 2019, **230**, 104626.
- 8 H. Hayami, S. Saito and S. Hasegawa, Spatiotemporal Variations of Fine Particulate Organic and Elemental Carbons in Greater Tokyo, *Asian J. Atmos. Environ*, 2019, **13**, 161–170.
- 9 U. C. Dumka, D. G. Kaskaoutis, S. Tiwari, P. D. Safai, S. D. Attri, V. K. Soni, N. Singh and N. Mihalopoulos, Assessment of biomass burning and fossil fuel contribution to black carbon concentrations in Delhi during winter, *Atmospheric Environment*, 2018, **194**, 93–109.
- 10 U. C. Dumka, D. G. Kaskaoutis, P. C. S. Devara, R. Kumar, S. Kumar, S. Tiwari, E. Gerasopoulos and N. Mihalopoulos, Year-long variability of the fossil fuel and wood burning black carbon components at a rural site in southern Delhi outskirts, *Atmospheric Research*, 2019, **216**, 11–25.
- 11 X. Peng, M. Liu, Y. Zhang, Z. Meng, V. Achal, T. Zhou, L. Long and Q. She, The characteristics and local-regional contributions of atmospheric black carbon over urban and suburban locations in Shanghai, China, *Environmental Pollution*, 2019, **255**, 113188.
- 12 J. Zhang, Y. Yao, C. Xiao, Y. Gu, X. Jin, P. Wang and L. Zhao, The pollution characterization of black carbon aerosols in the southwest suburb of Beijing from 2013 to 2019, *Atmospheric Pollution Research*, 2023, **14**, 101669.
- 13 J. Sun, Z. Wang, W. Zhou, C. Xie, C. Wu, C. Chen, T. Han, Q. Wang, Z. Li, J. Li, P. Fu, Z. Wang and Y. Sun, Measurement report: Long-term changes in black carbon and aerosol optical properties from 2012 to 2020 in Beijing, China, *Atmospheric Chemistry and Physics*, 2022, **22**, 561–575.
- 14 J. Su, R. Zhang, B. Liu, M. Tong, S. Xiao, X. Wang, Q. Zhao, W. Song, D. Talifu and X. Wang, Seasonal and Day–Night Variations in Carbonaceous Aerosols and Their Light-Absorbing Properties in Guangzhou, China, *Atmosphere*, 2023, **14**, 1545.
- 15 D. Cheng, C. Wu, L. Song, T. L. Sun and A. M. Liu, Comparative study on the characteristics of black carbon aerosol in urban and suburban areas of Shenzhen, *China Environ. Sci.*, 2018, **38**, 1653–1662.
