# Supplementary material
Source: Royal Society of Chemistry journal article supplement (doi:10.1039/d6ea00019c)

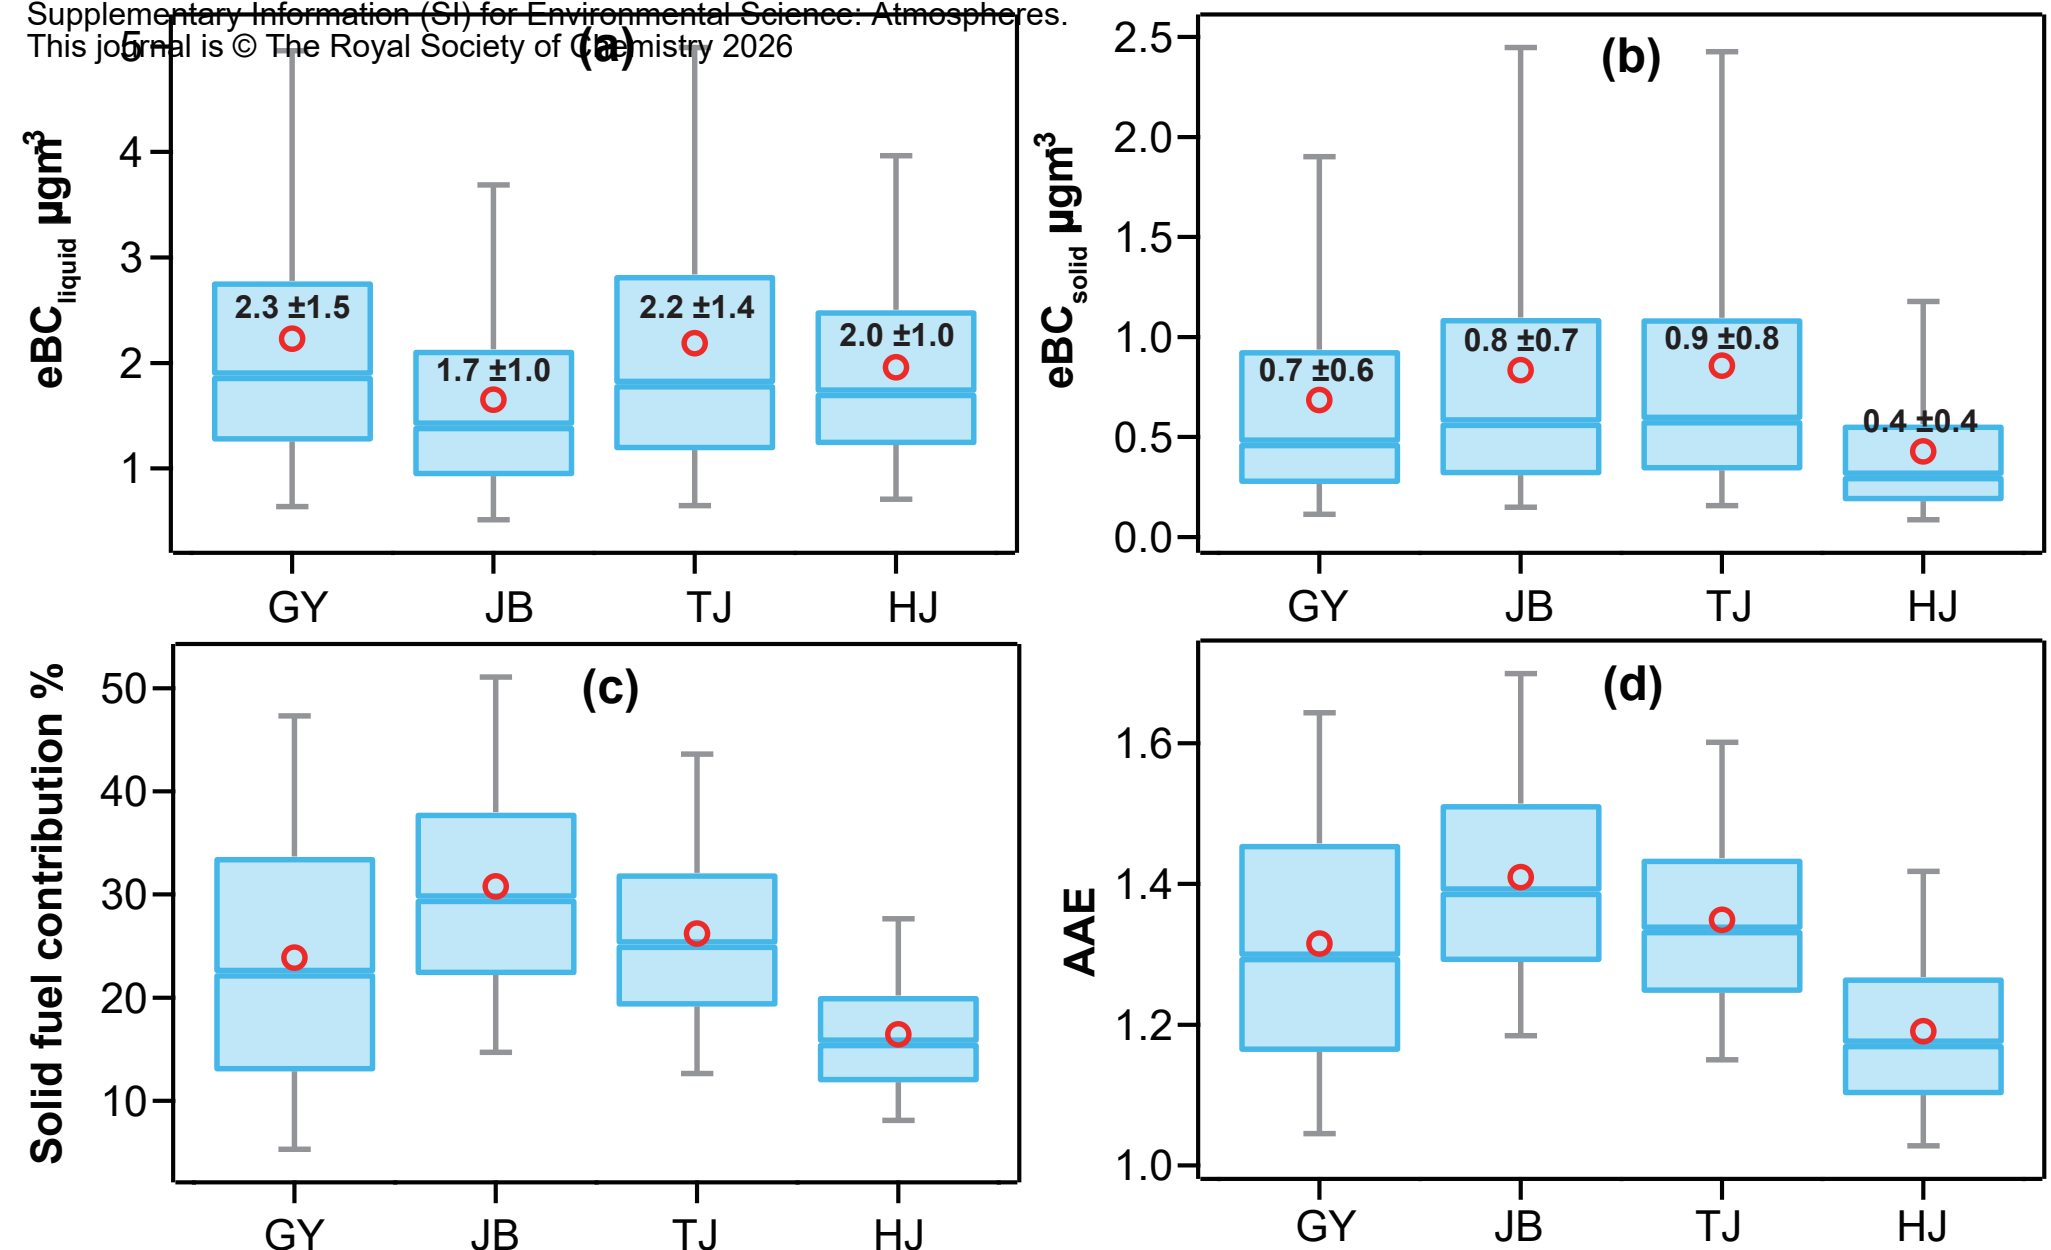

Supplement: d6ea00019c1.pdf [file d6ea00019c1.pdf]

Months

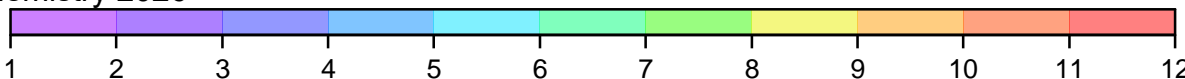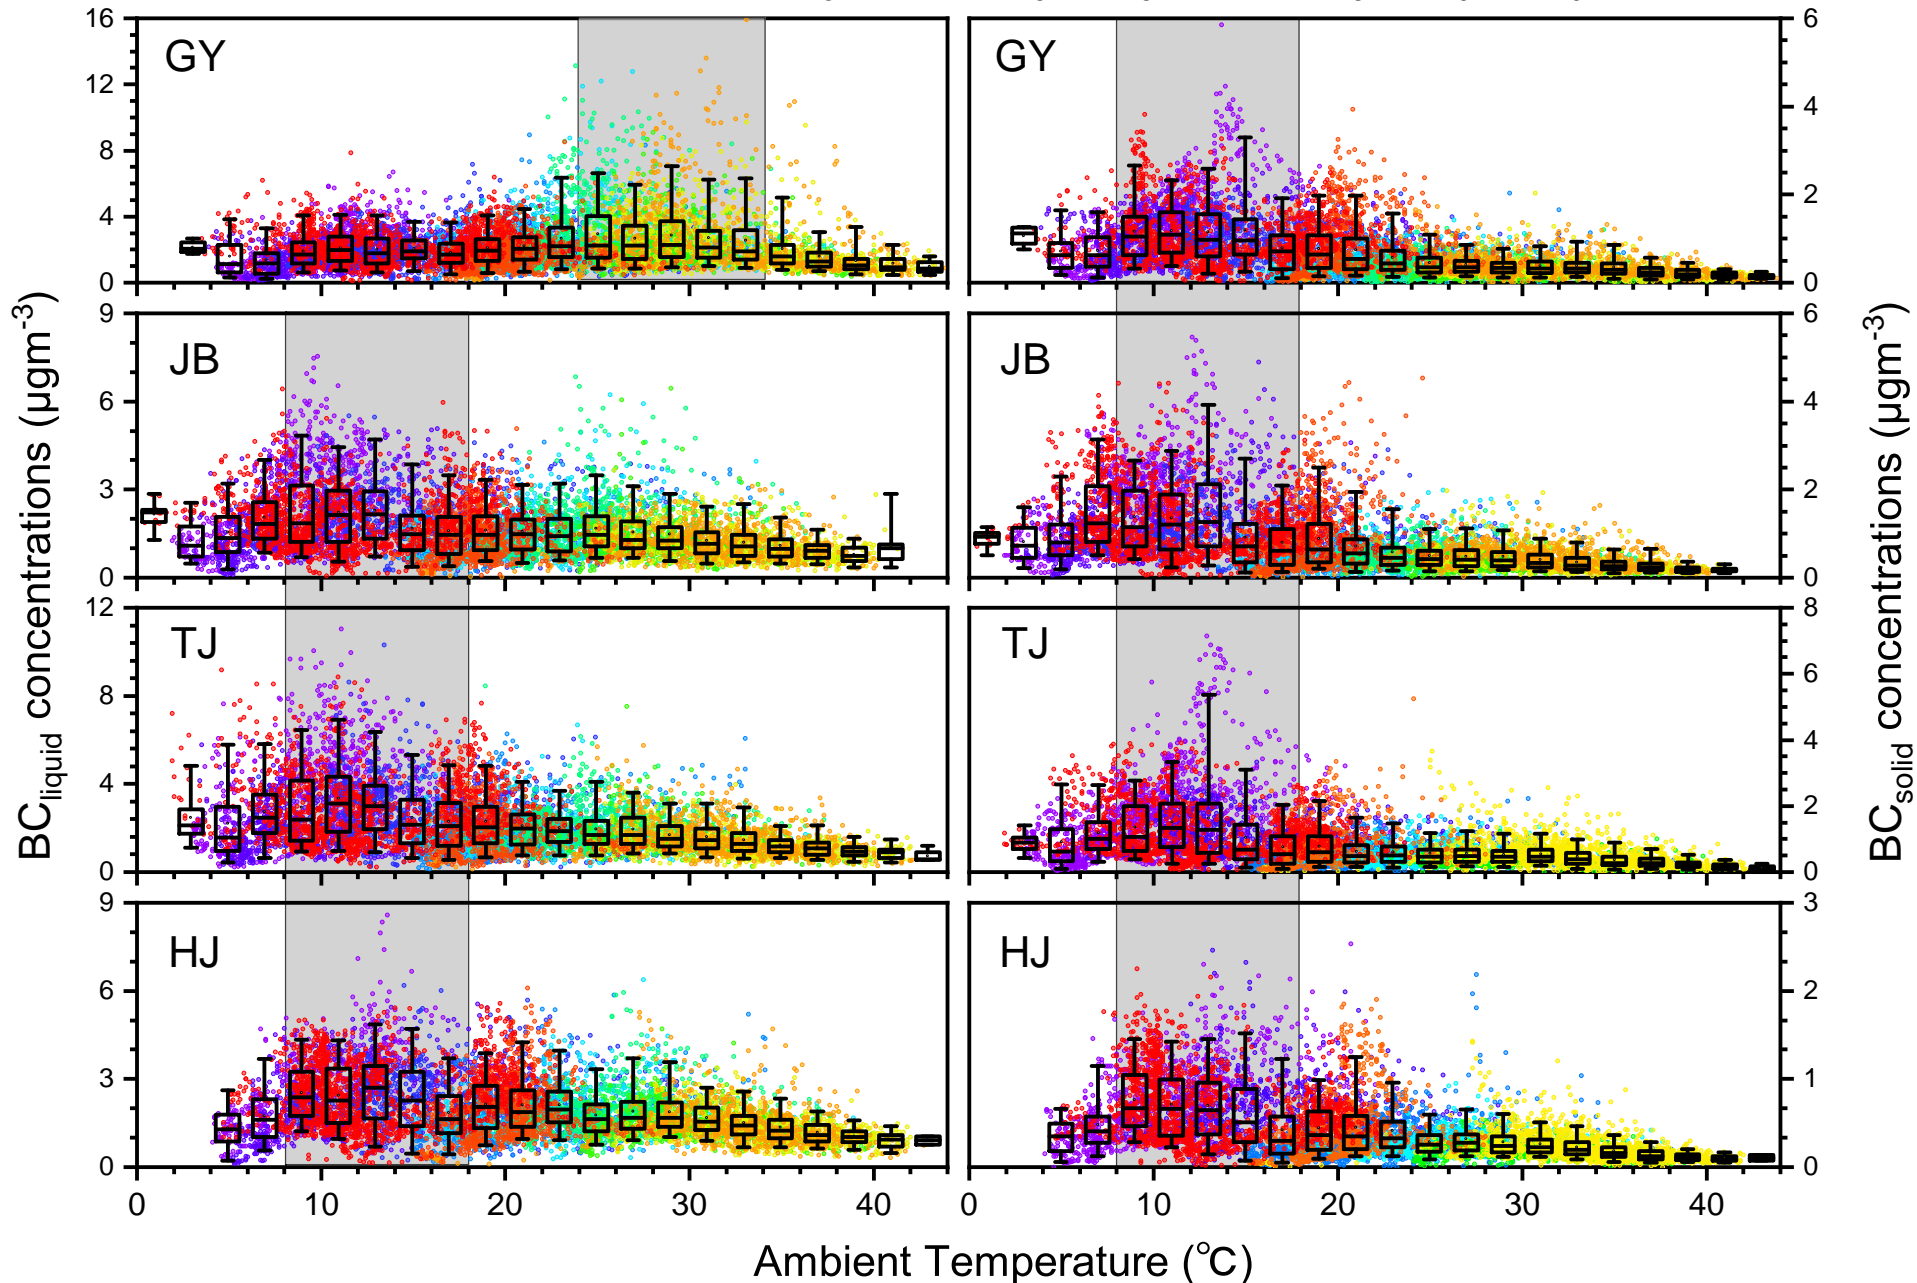

Supplement: d6ea00019c10.pdf [file d6ea00019c10.pdf]

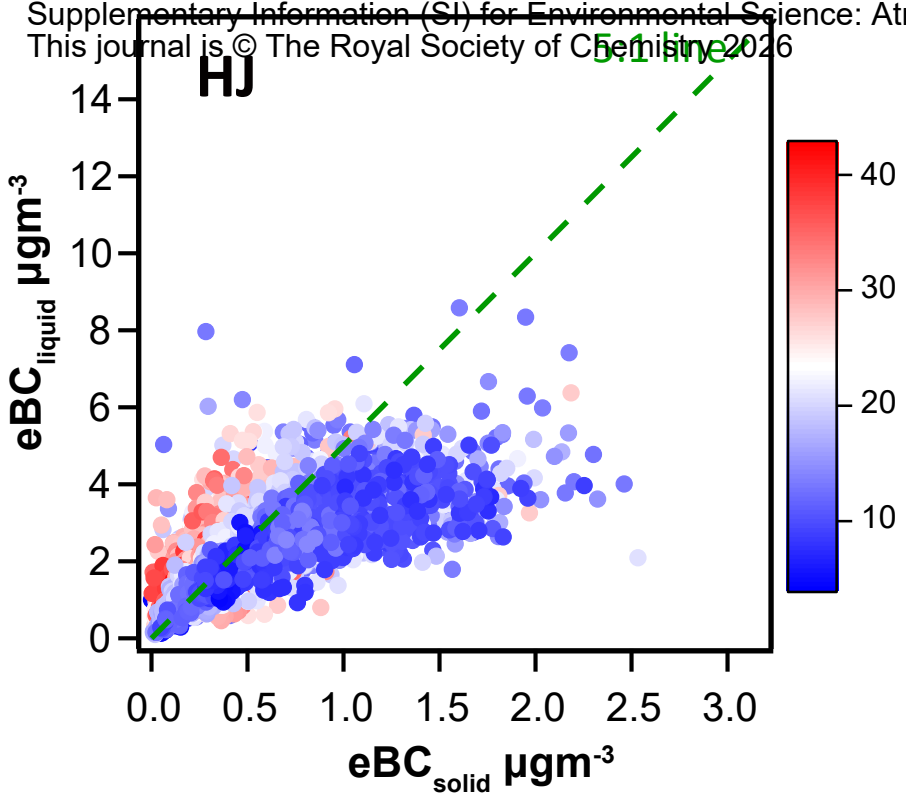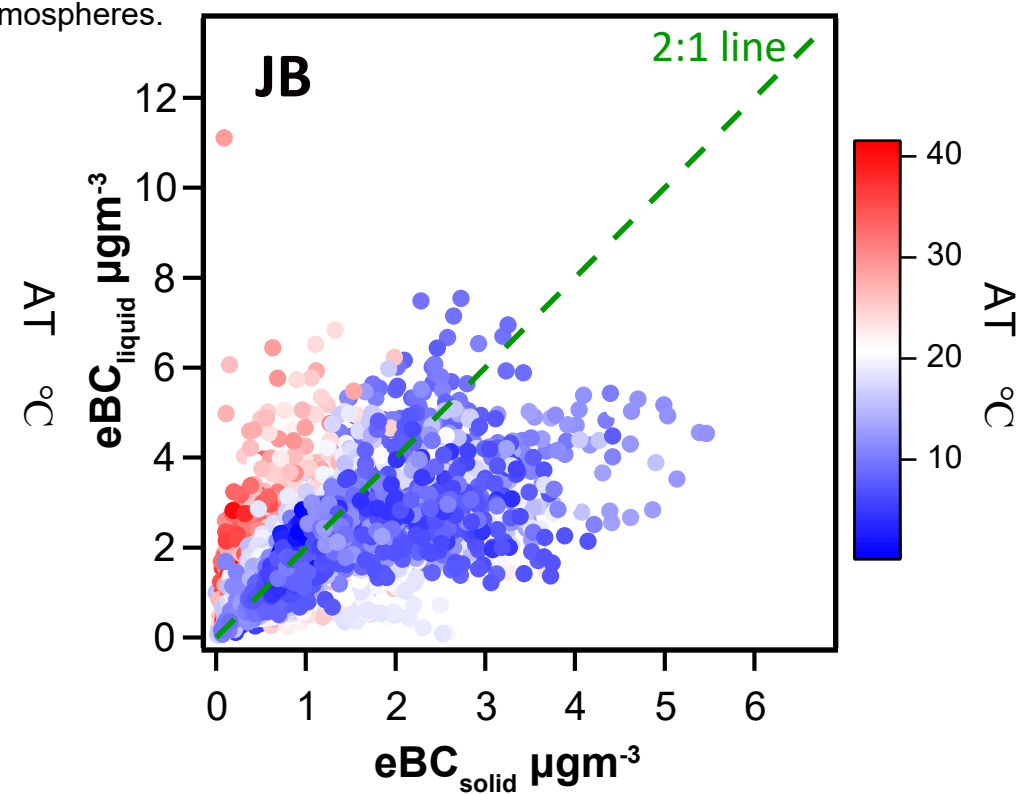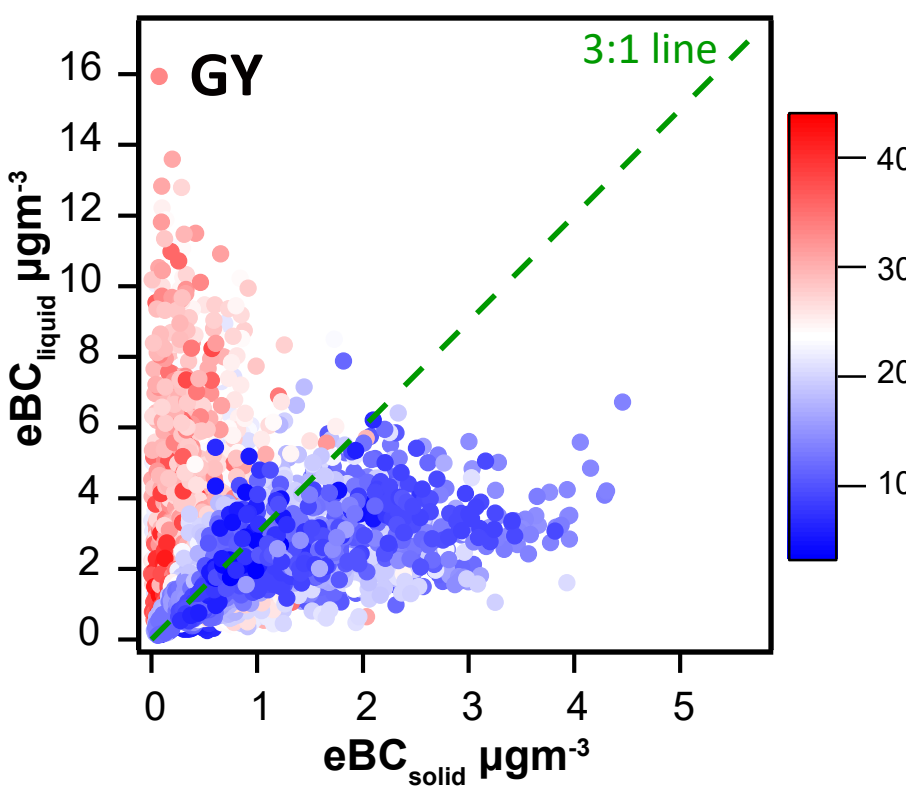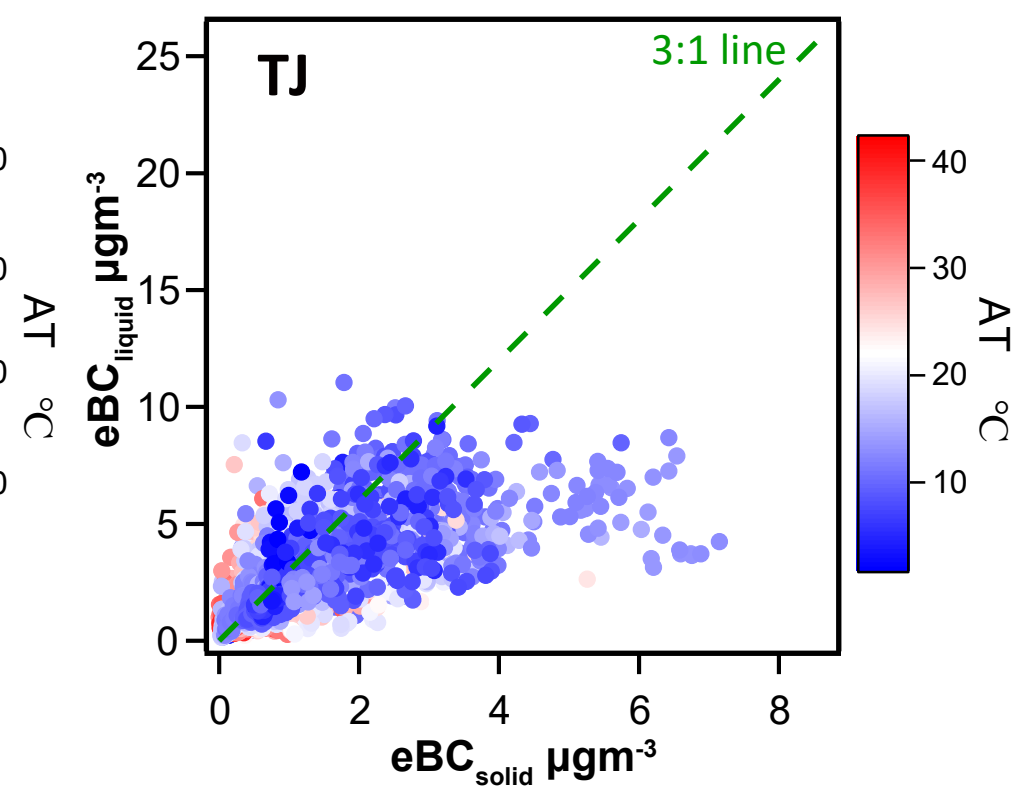

Supplement: d6ea00019c11.pdf [file d6ea00019c11.pdf]

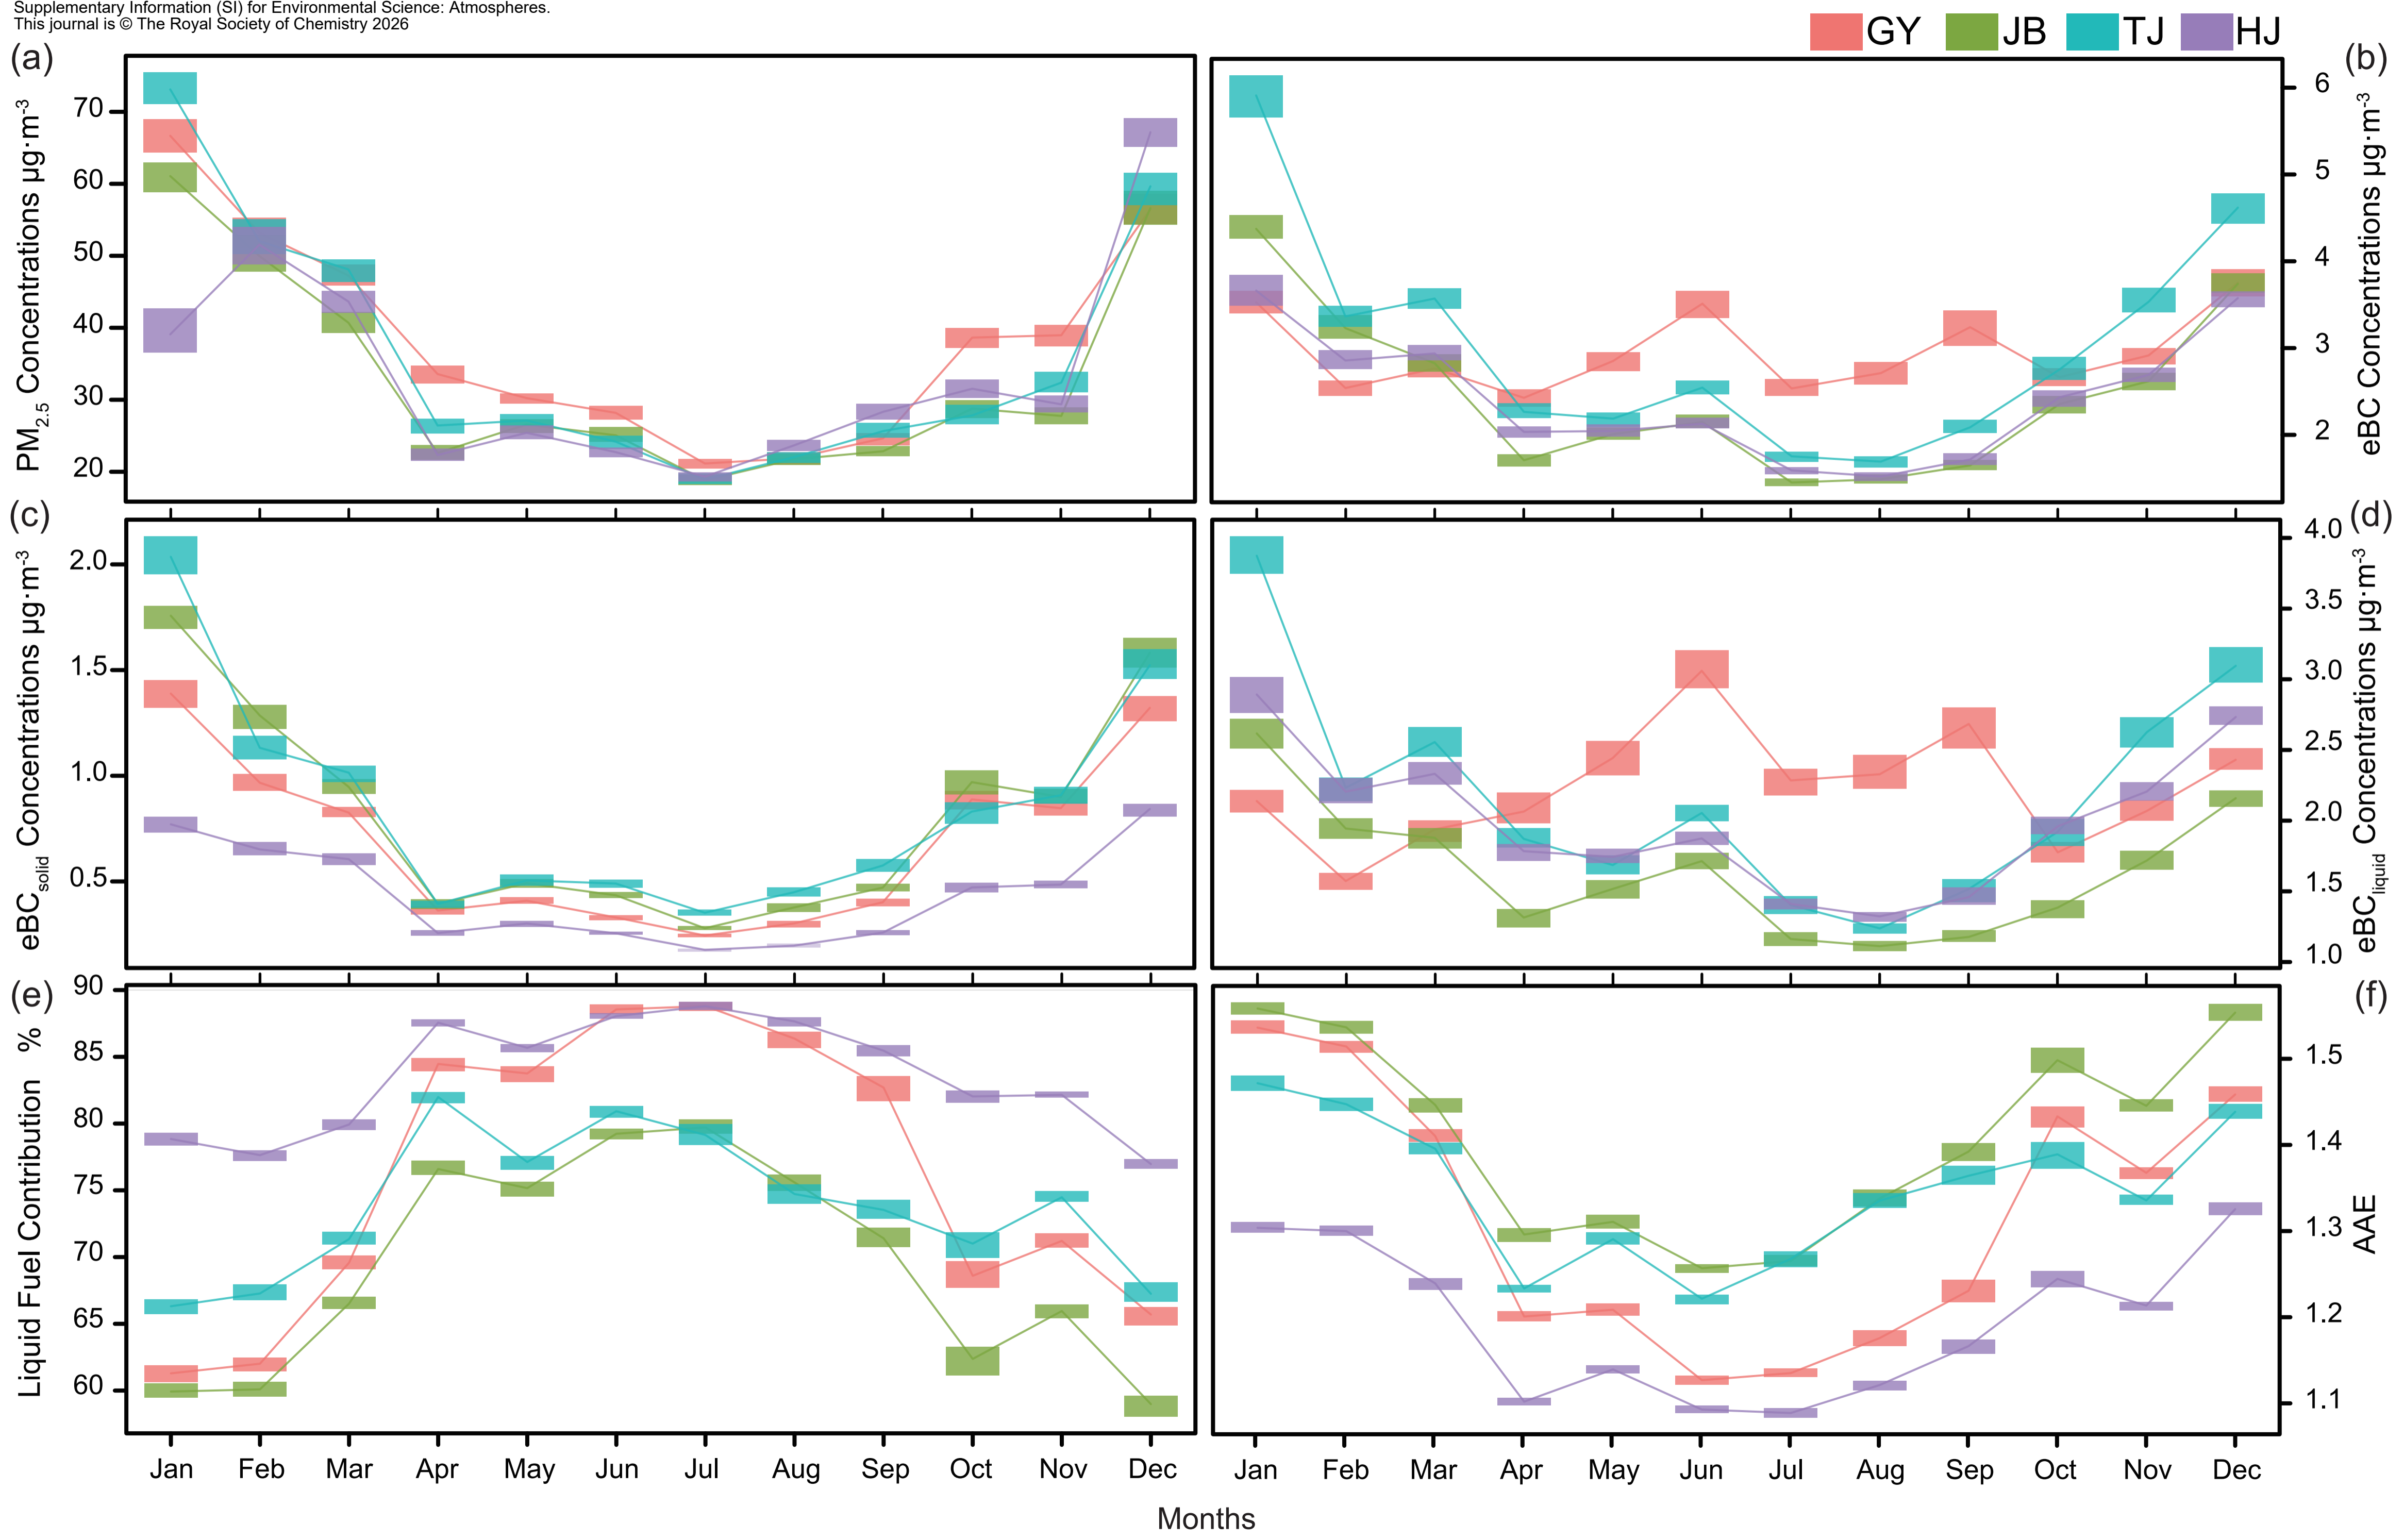

Supplement: d6ea00019c12.pdf [file d6ea00019c12.pdf]

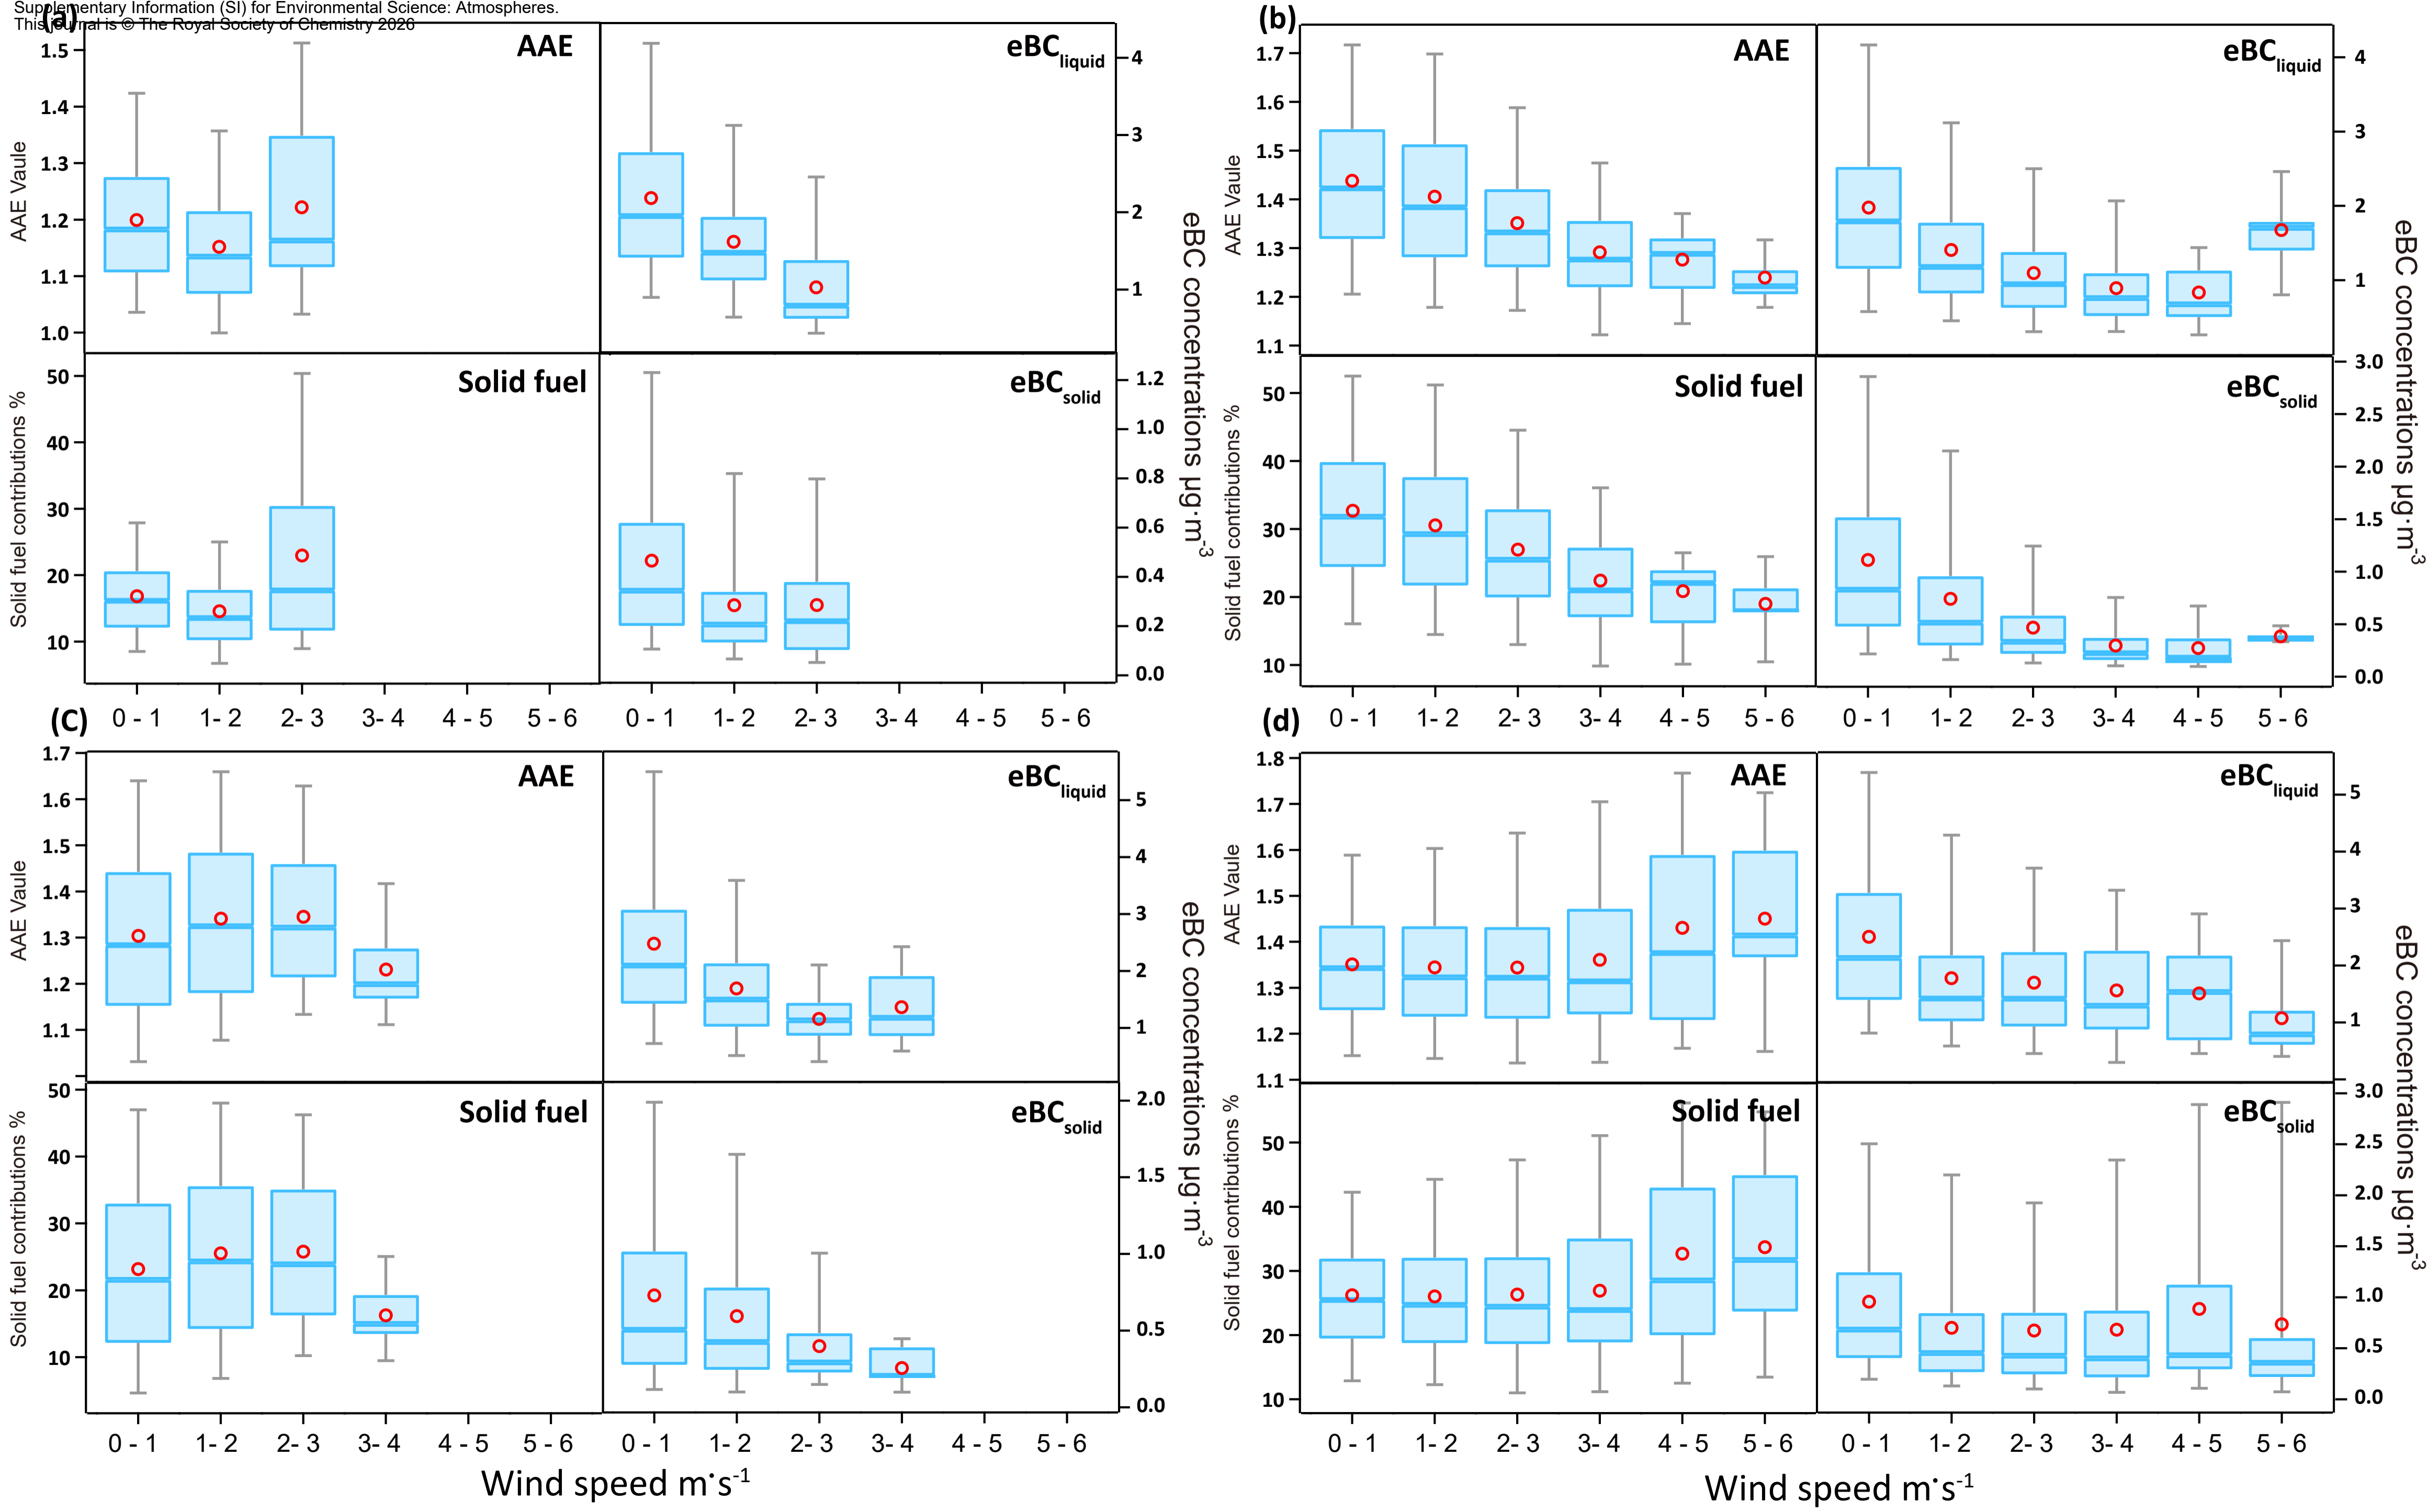

Supplement: d6ea00019c13.pdf [file d6ea00019c13.pdf]

AAE

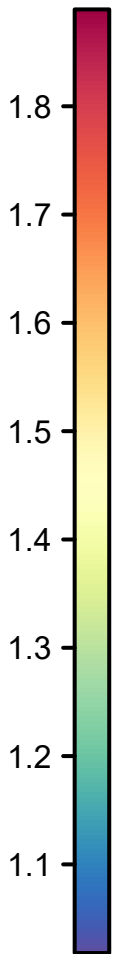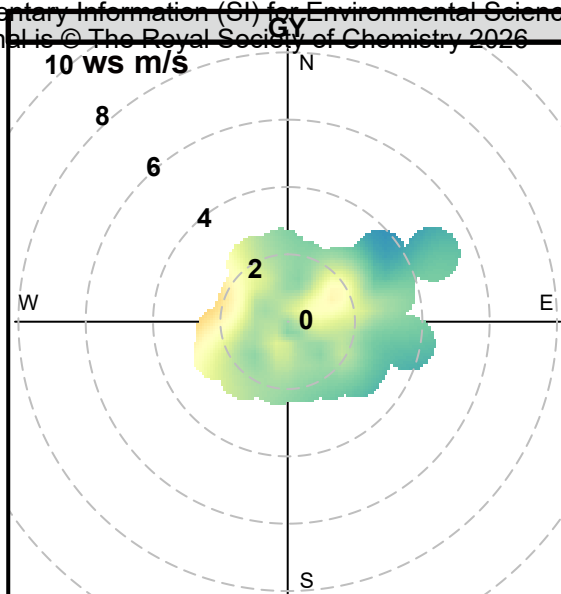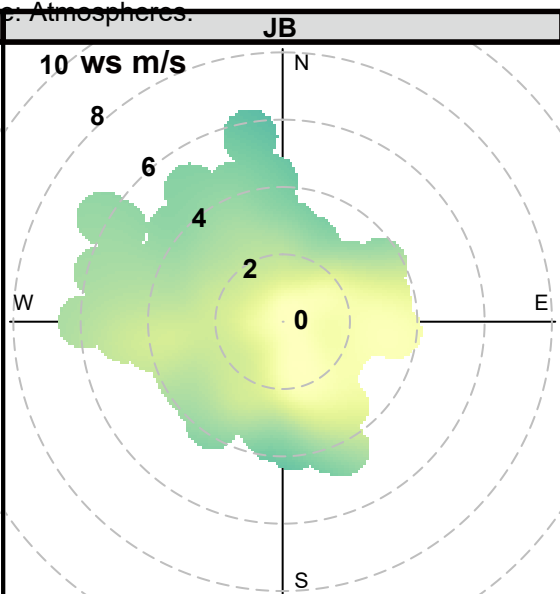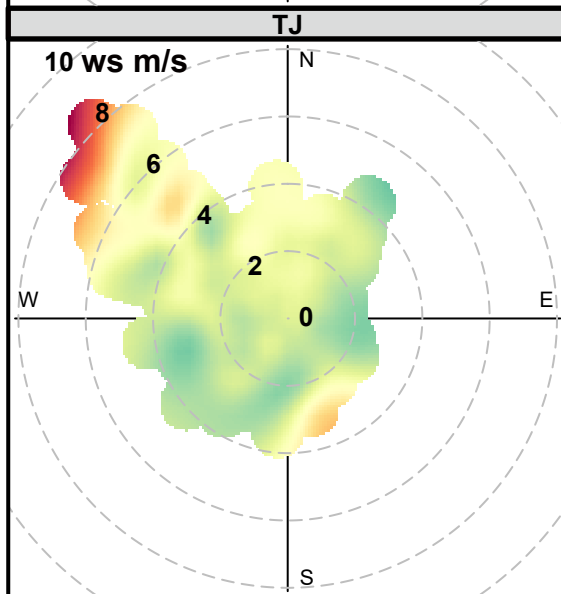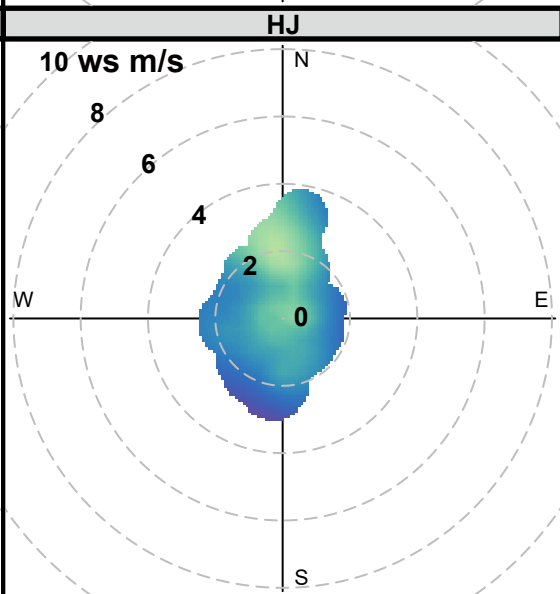

Supplement: d6ea00019c14.pdf [file d6ea00019c14.pdf]

# GEMS-2019 (0.1°)

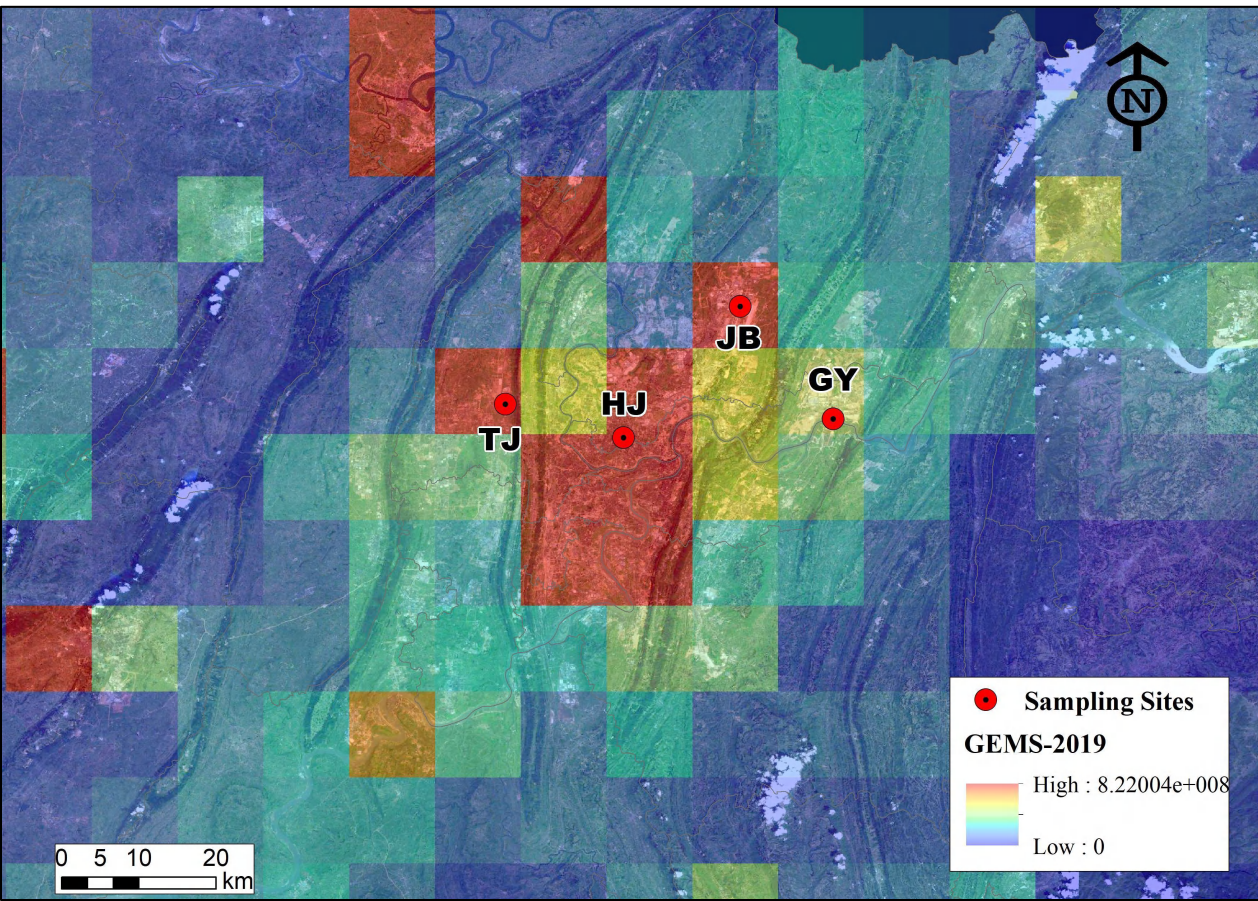

# MEIC 2.0-2023 (0.25°)

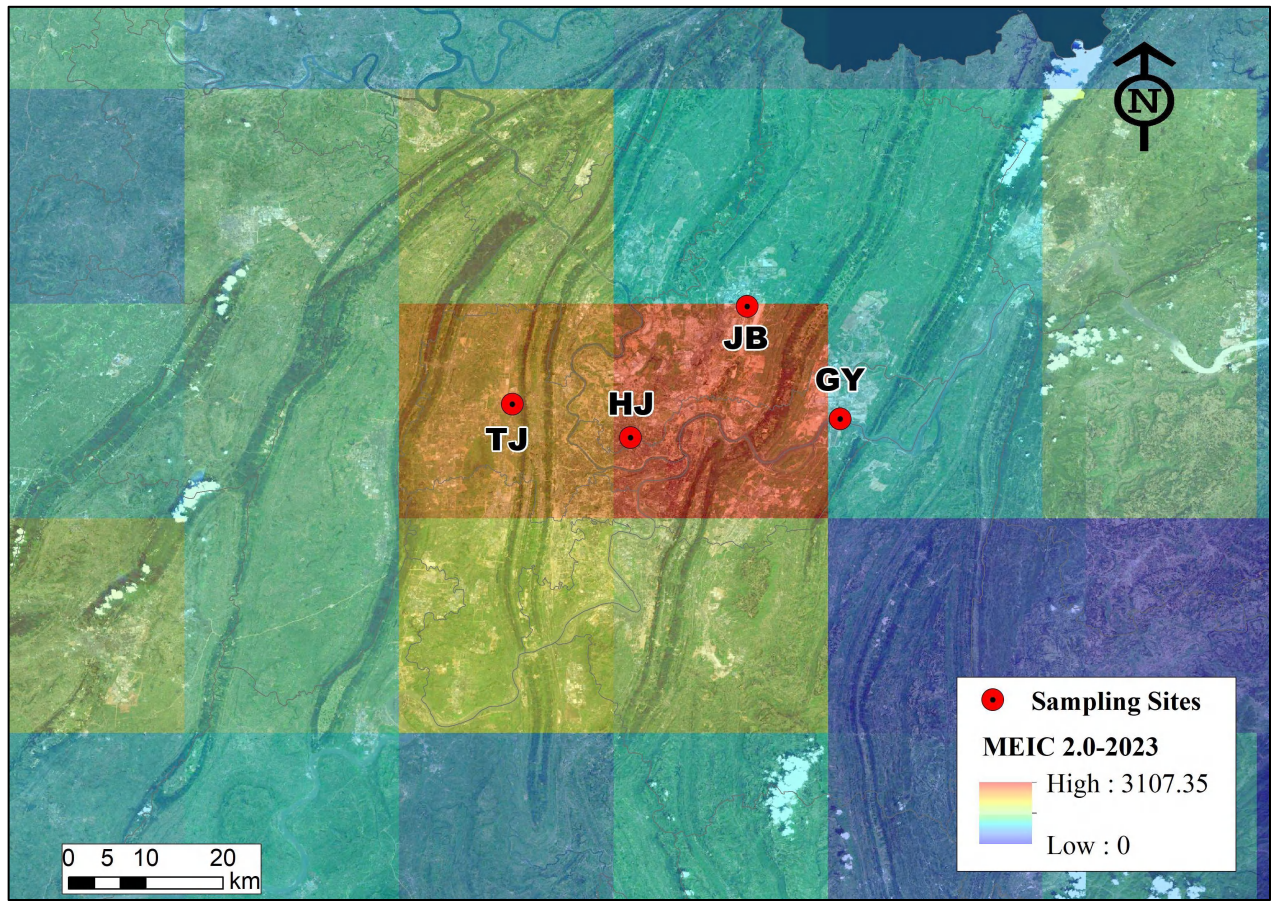

Supplement: d6ea00019c15.pdf [file d6ea00019c15.pdf]

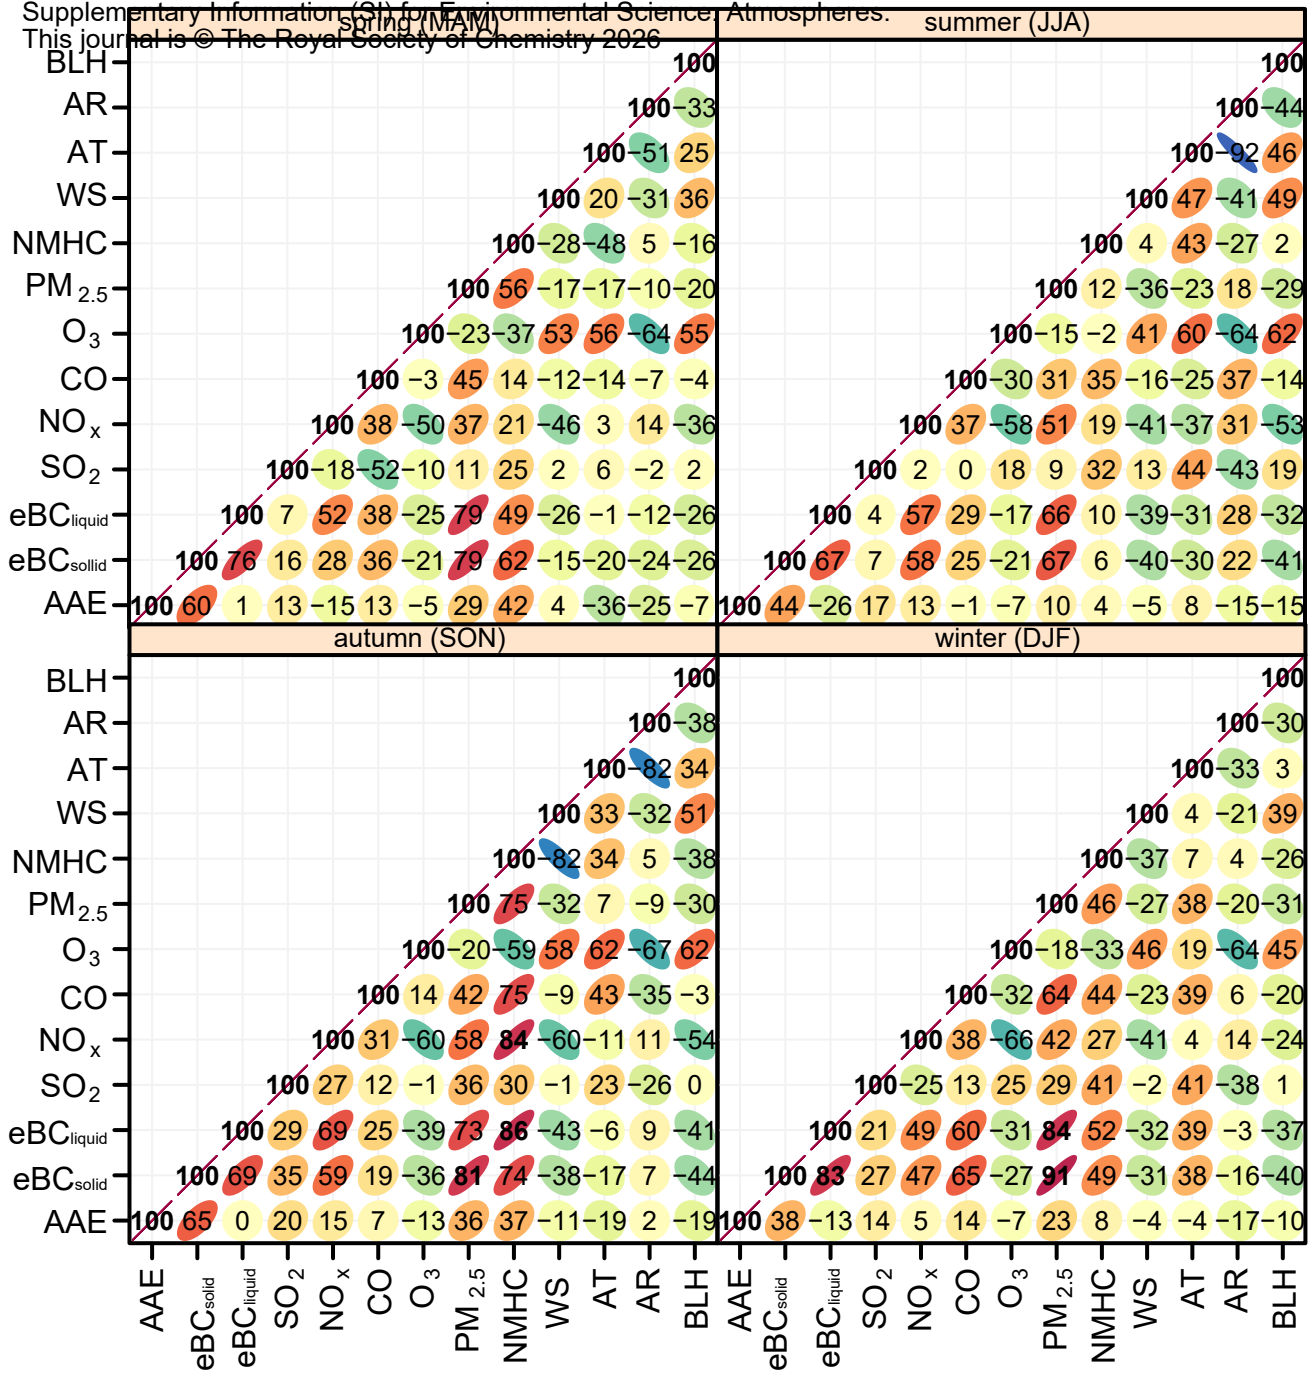

Supplement: d6ea00019c17.pdf [file d6ea00019c17.pdf]

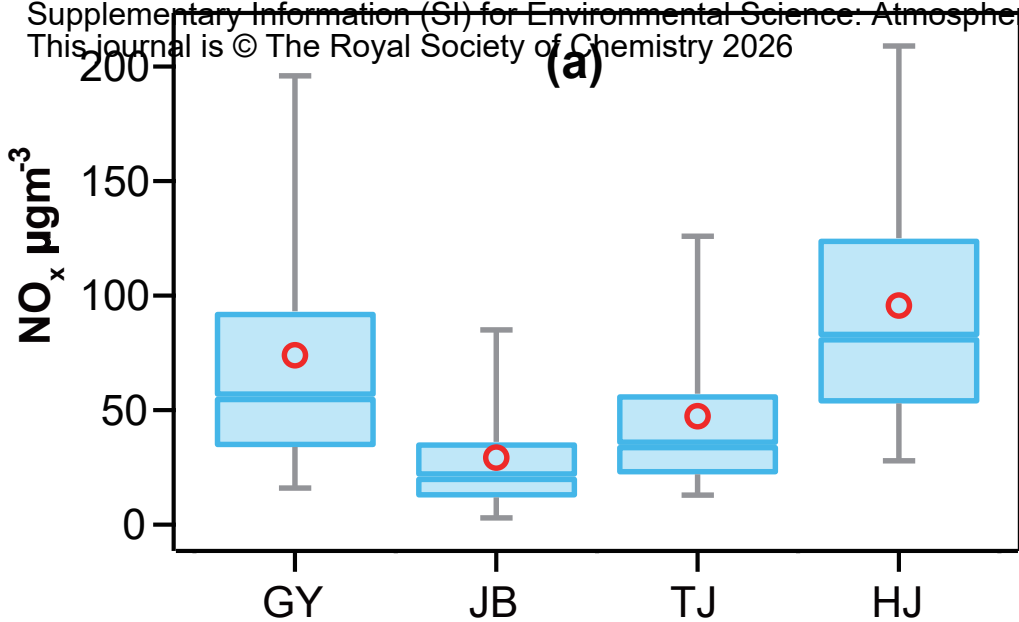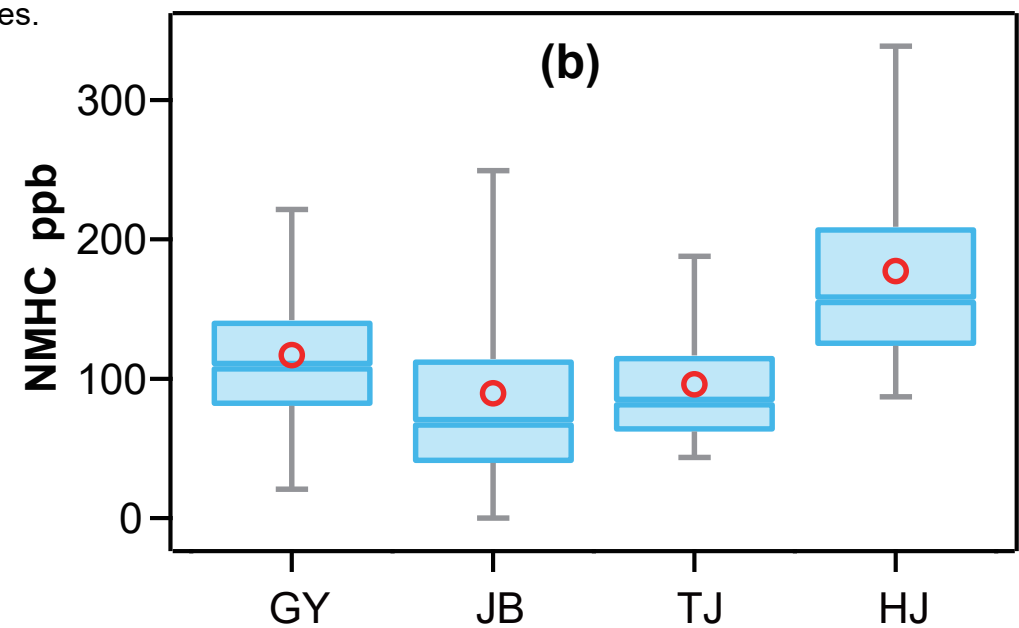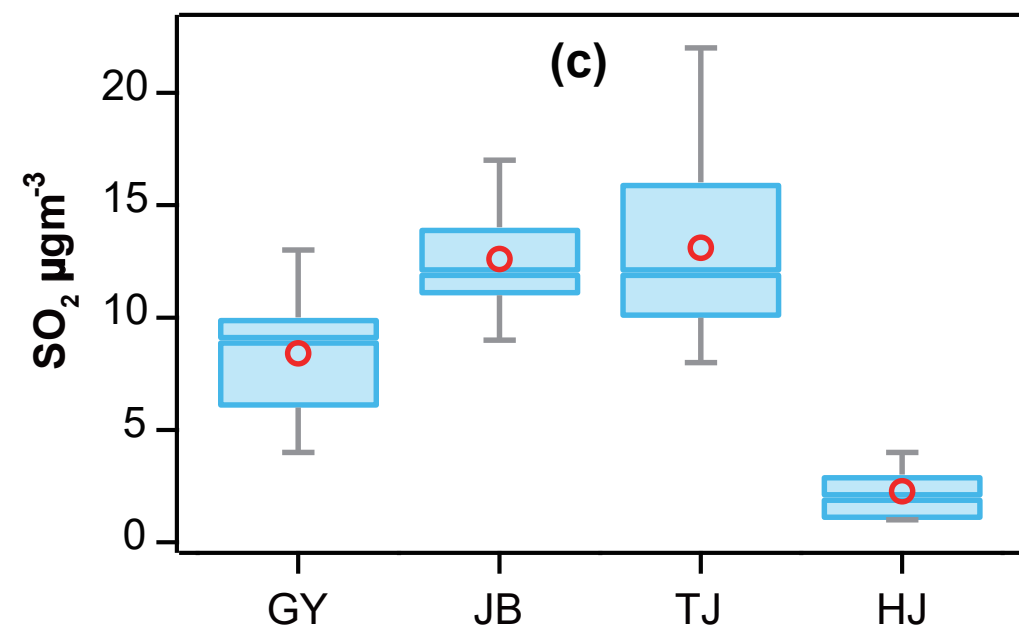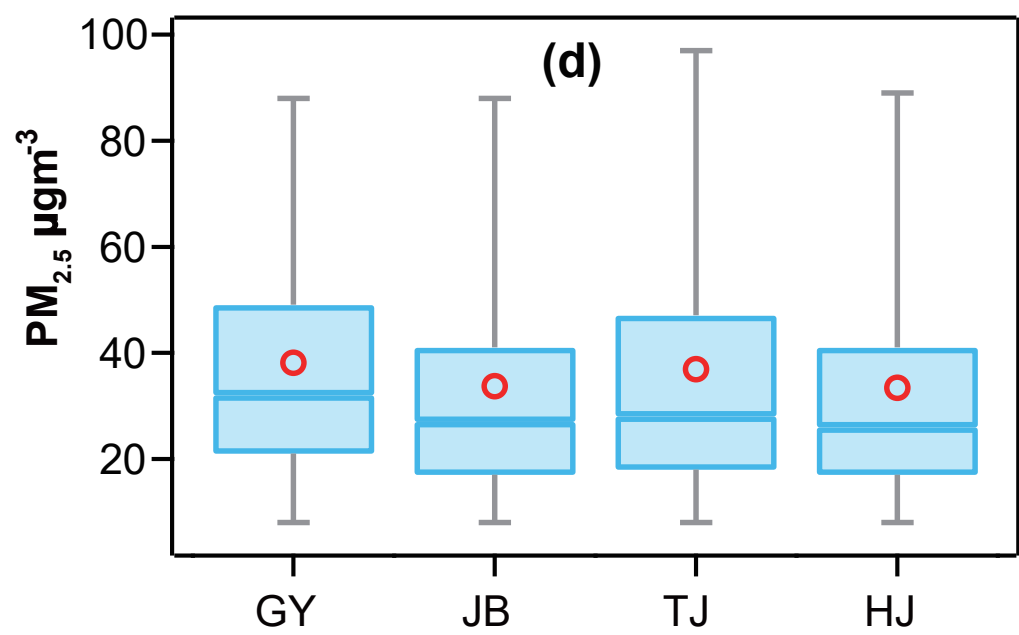

Supplement: d6ea00019c2.pdf [file d6ea00019c2.pdf]

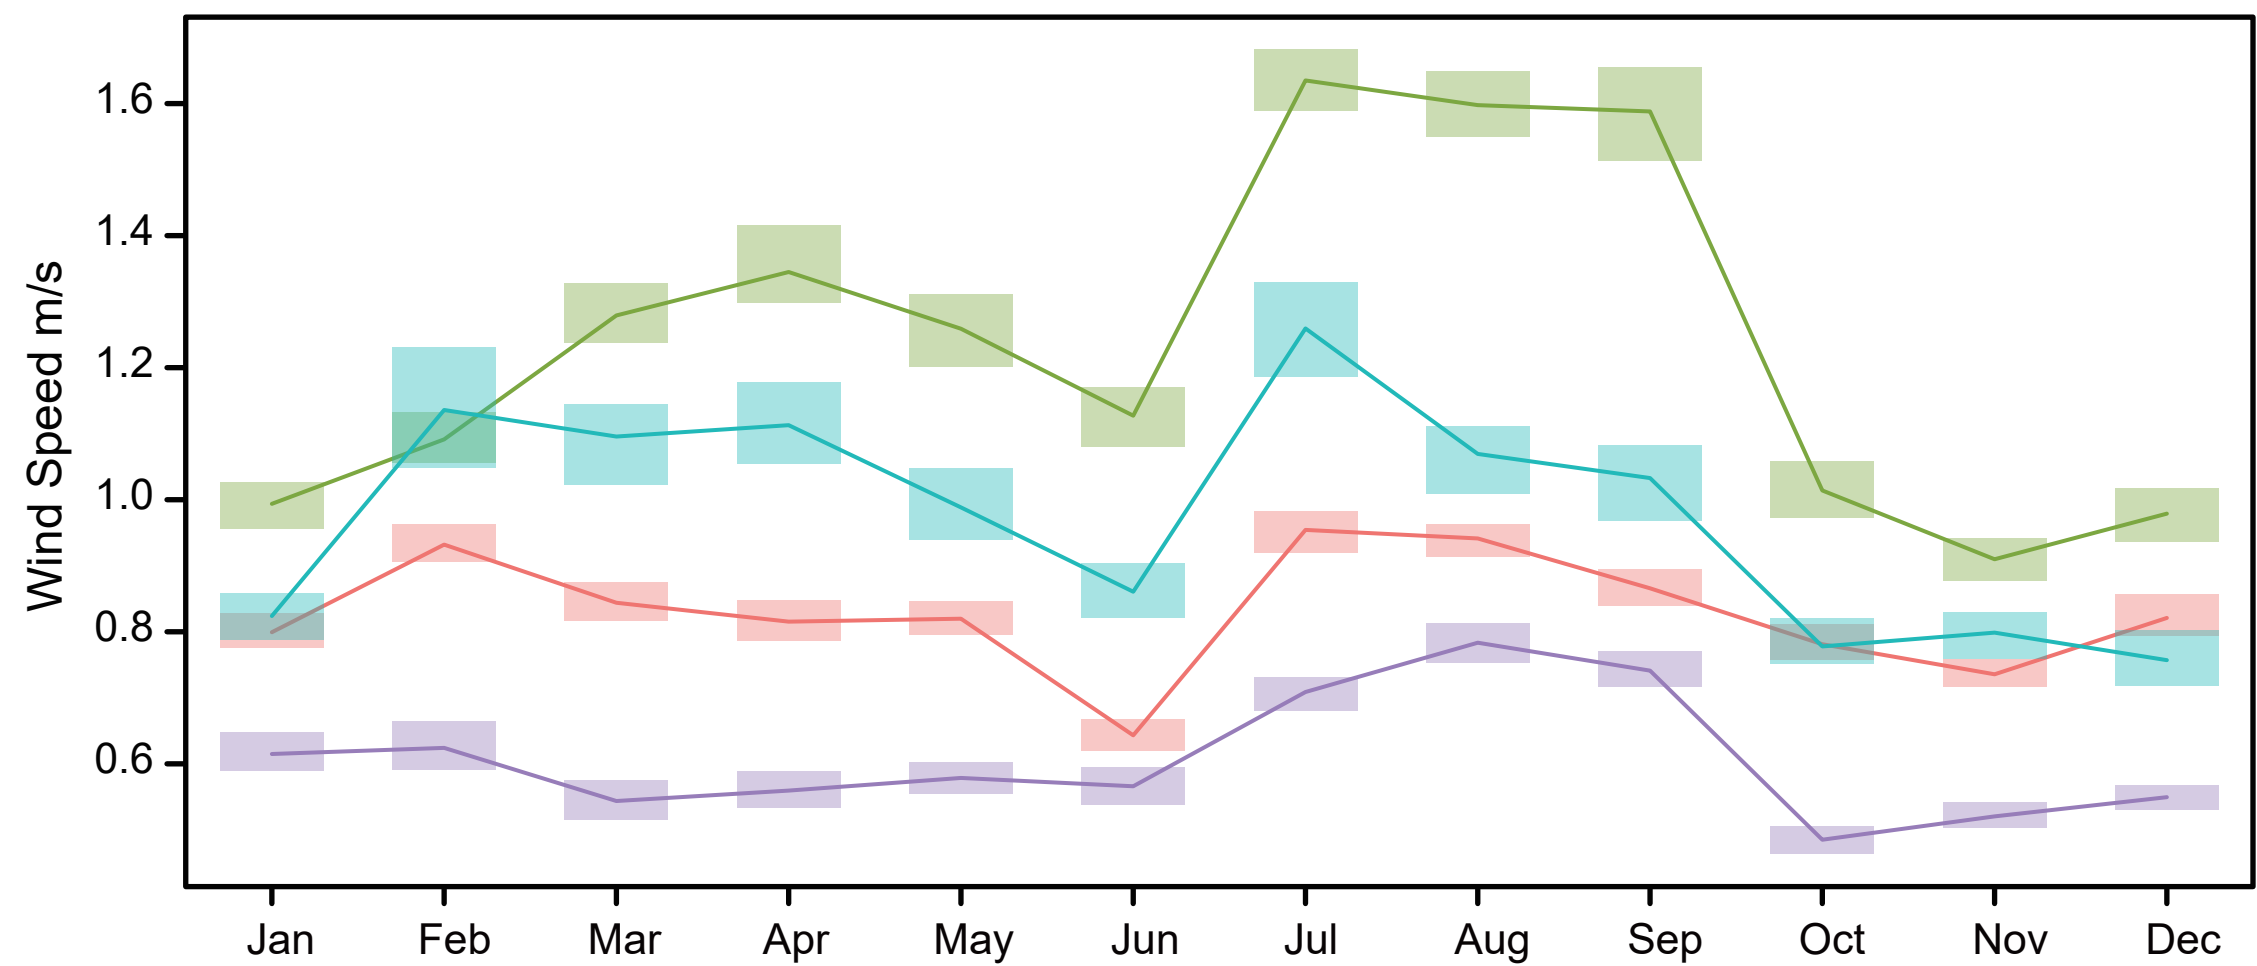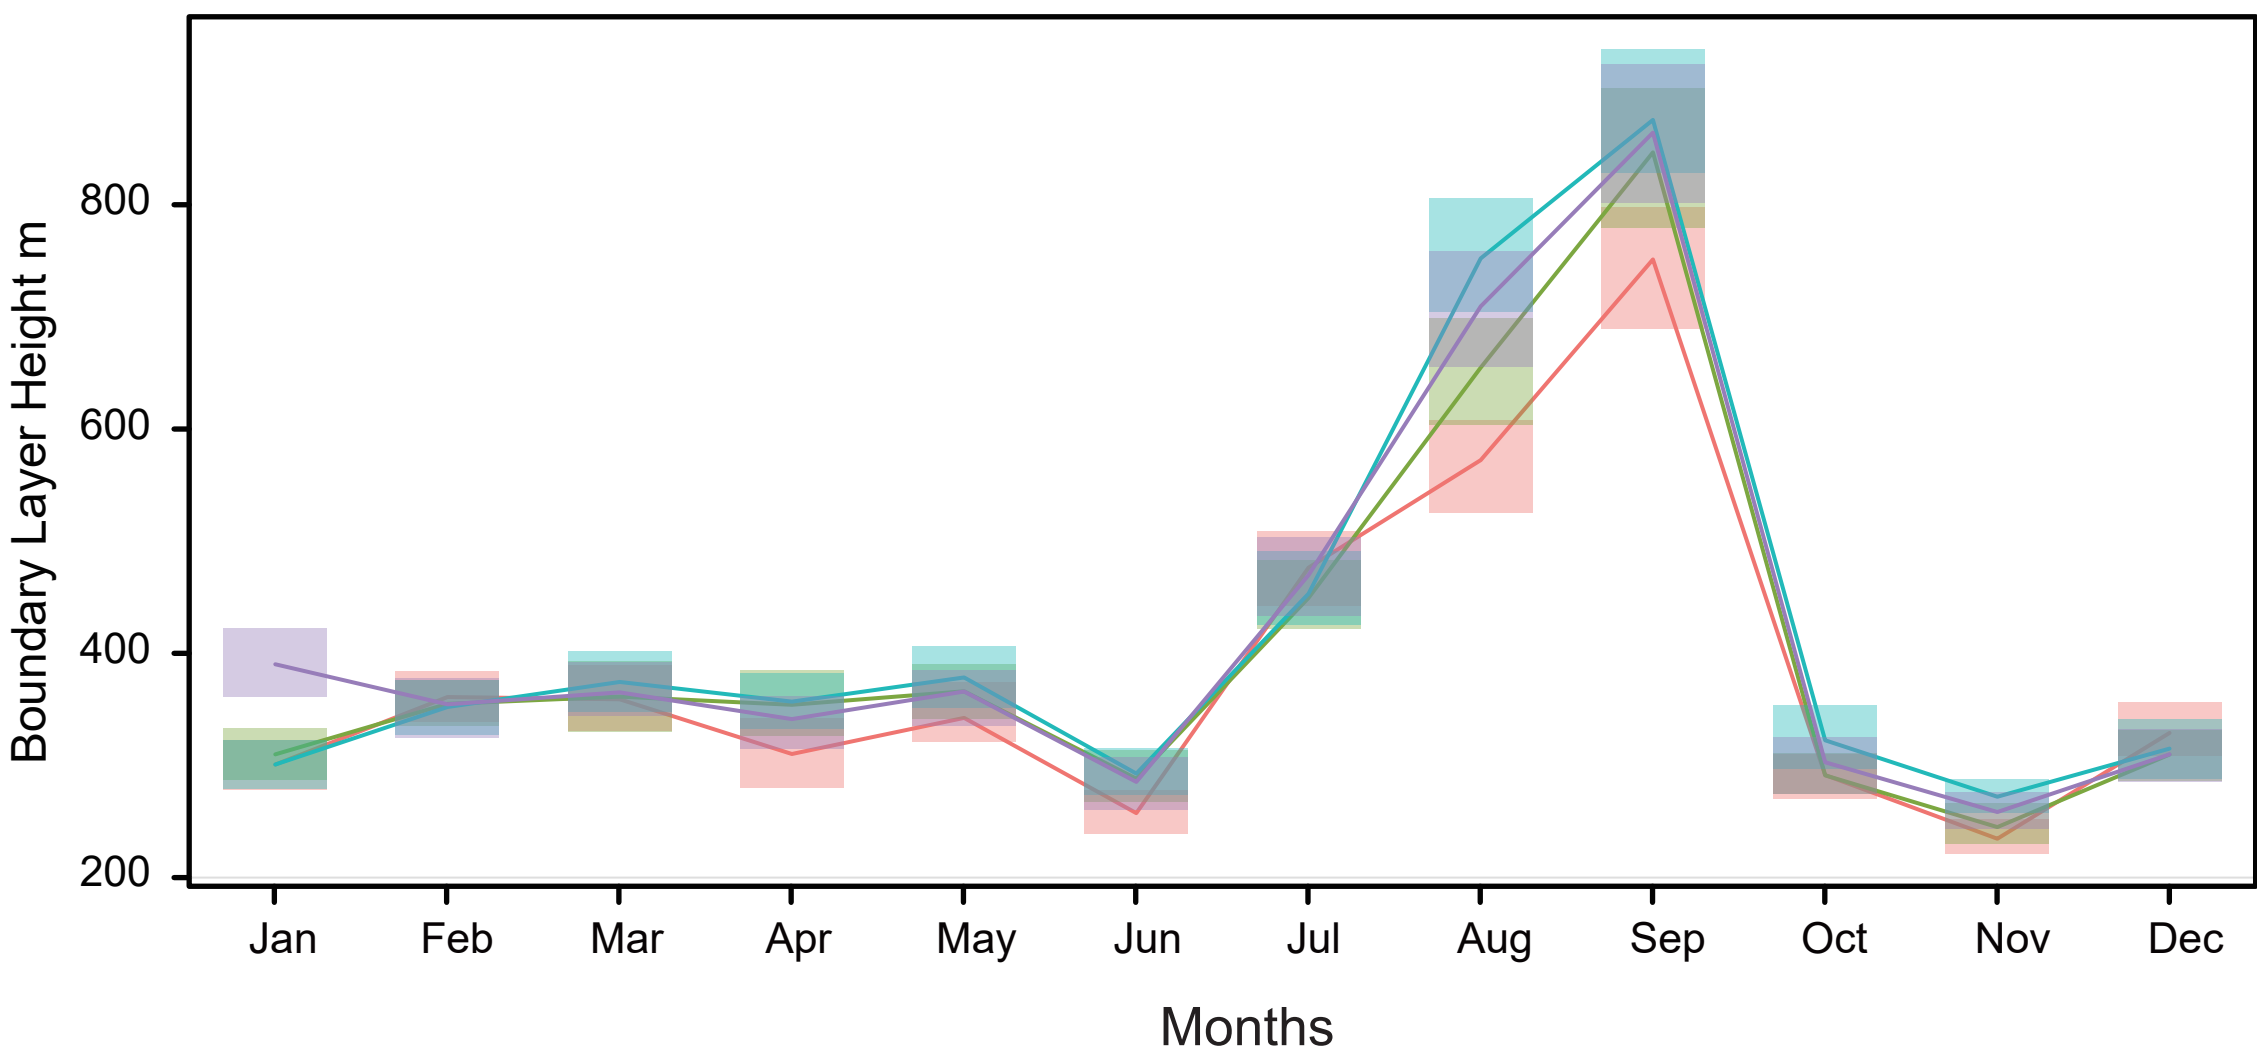

Supplement: d6ea00019c3.pdf [file d6ea00019c3.pdf]

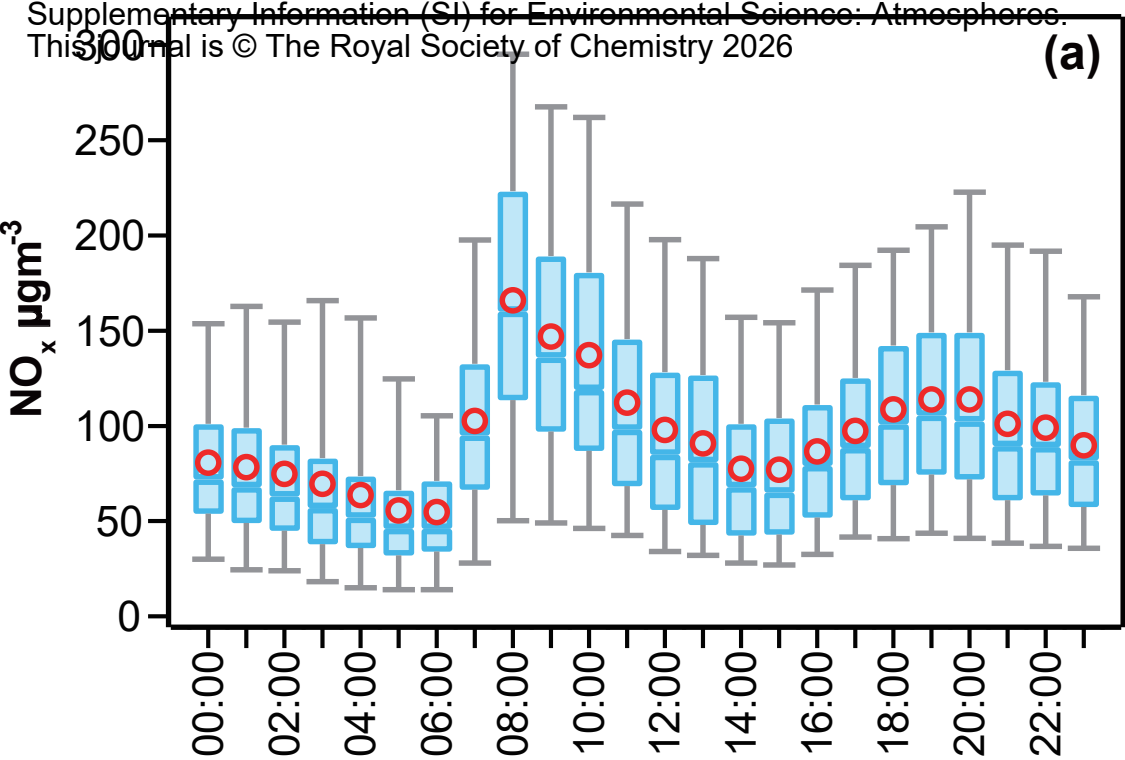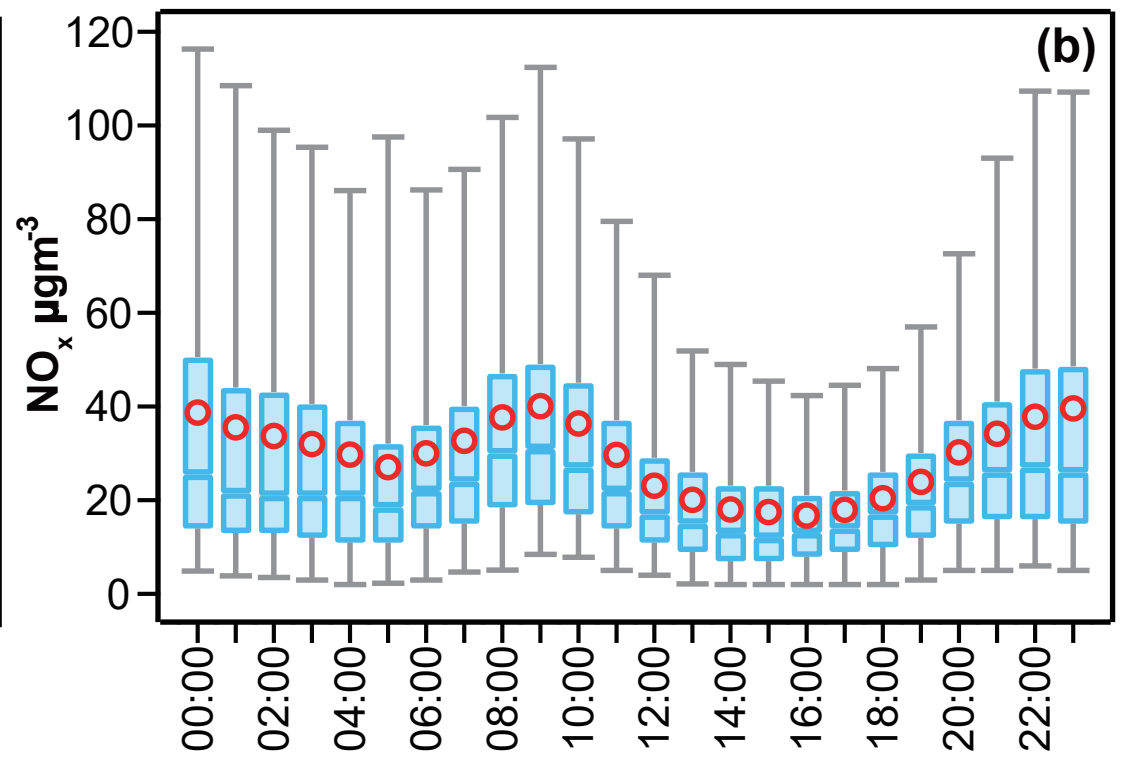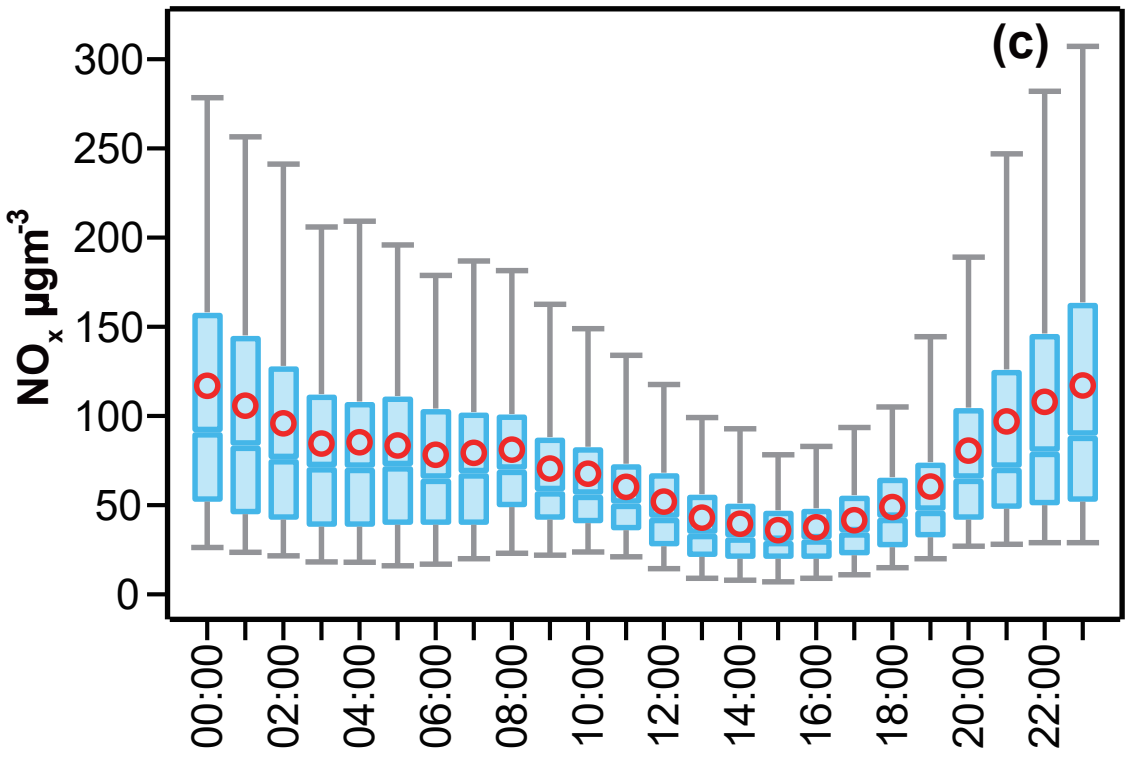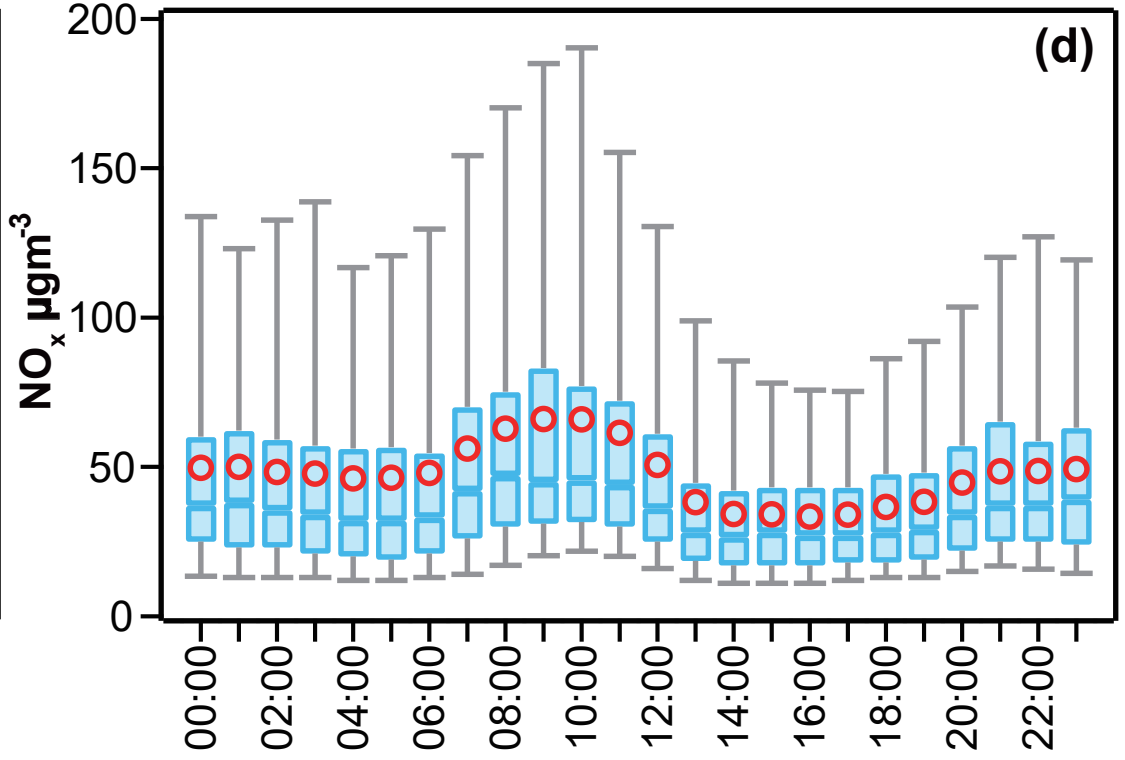

Supplement: d6ea00019c4.pdf [file d6ea00019c4.pdf]

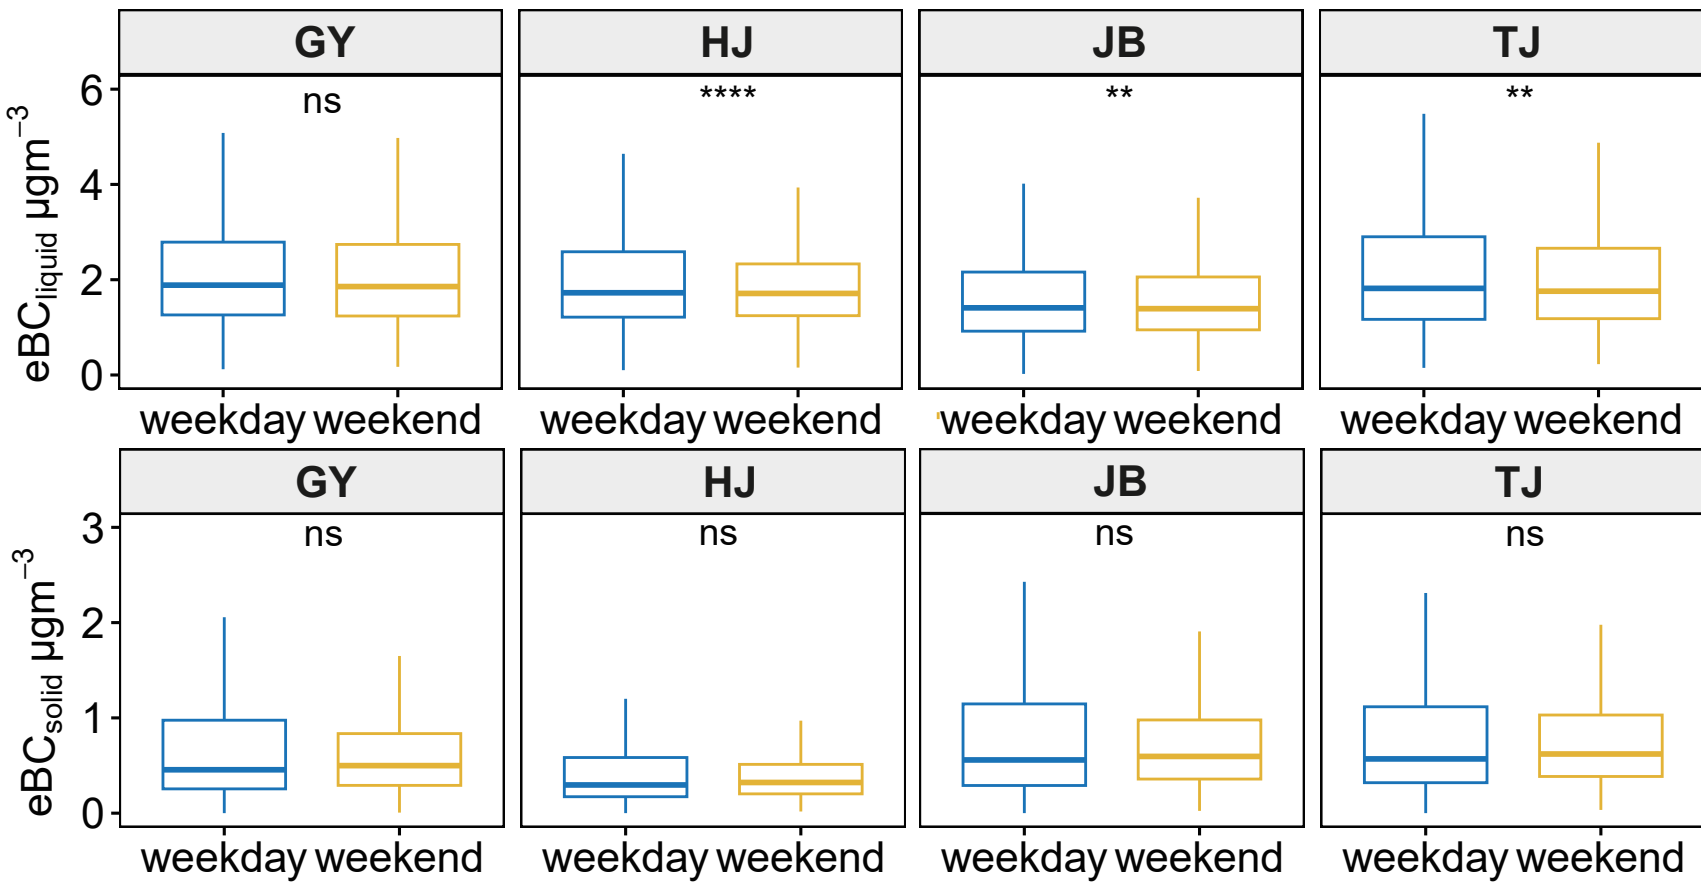

Supplement: d6ea00019c5.pdf [file d6ea00019c5.pdf]

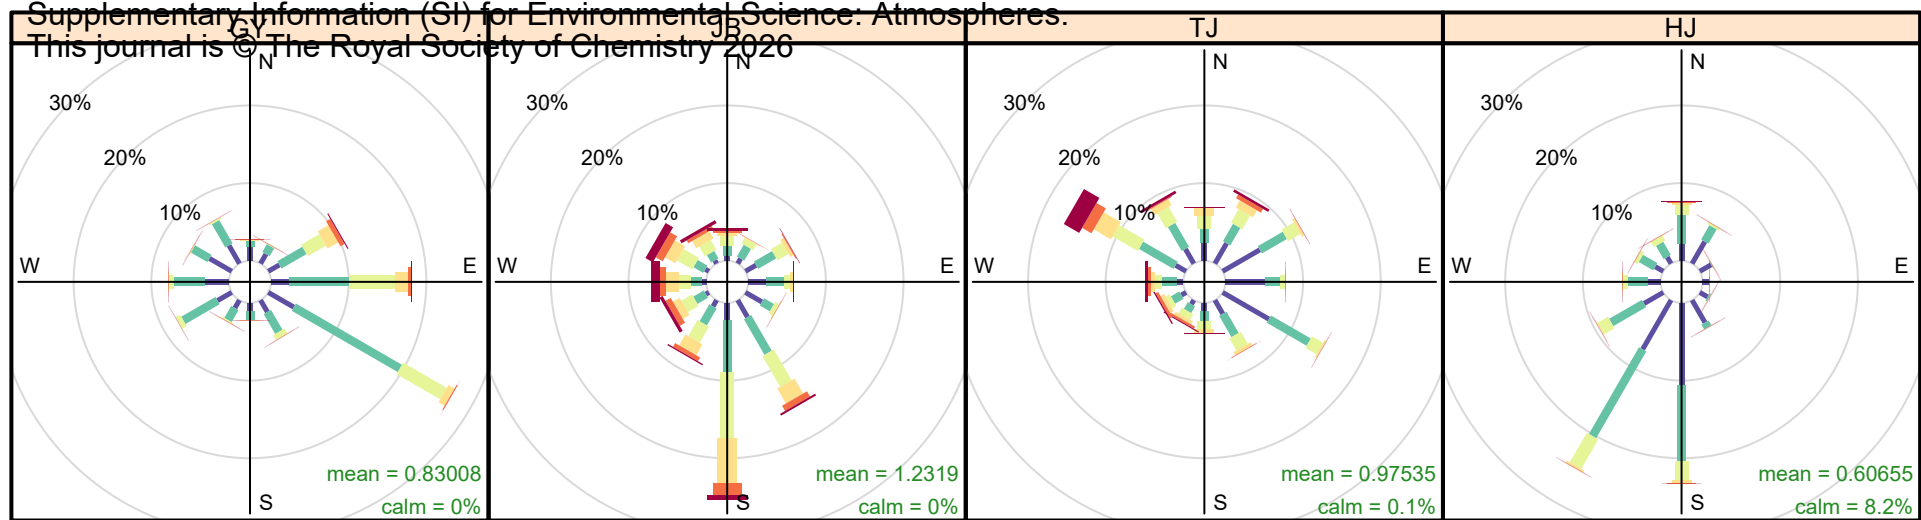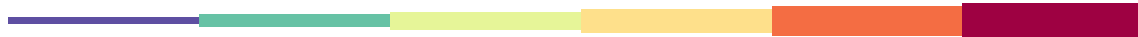

0 to 0.5    0.5 to 1    1 to 1.5    1.5 to 2    2 to 2.5    2.5 to 8.1

(m s<sup>-1</sup>)

Frequency of counts by wind direction (%)

Supplement: d6ea00019c6.pdf [file d6ea00019c6.pdf]

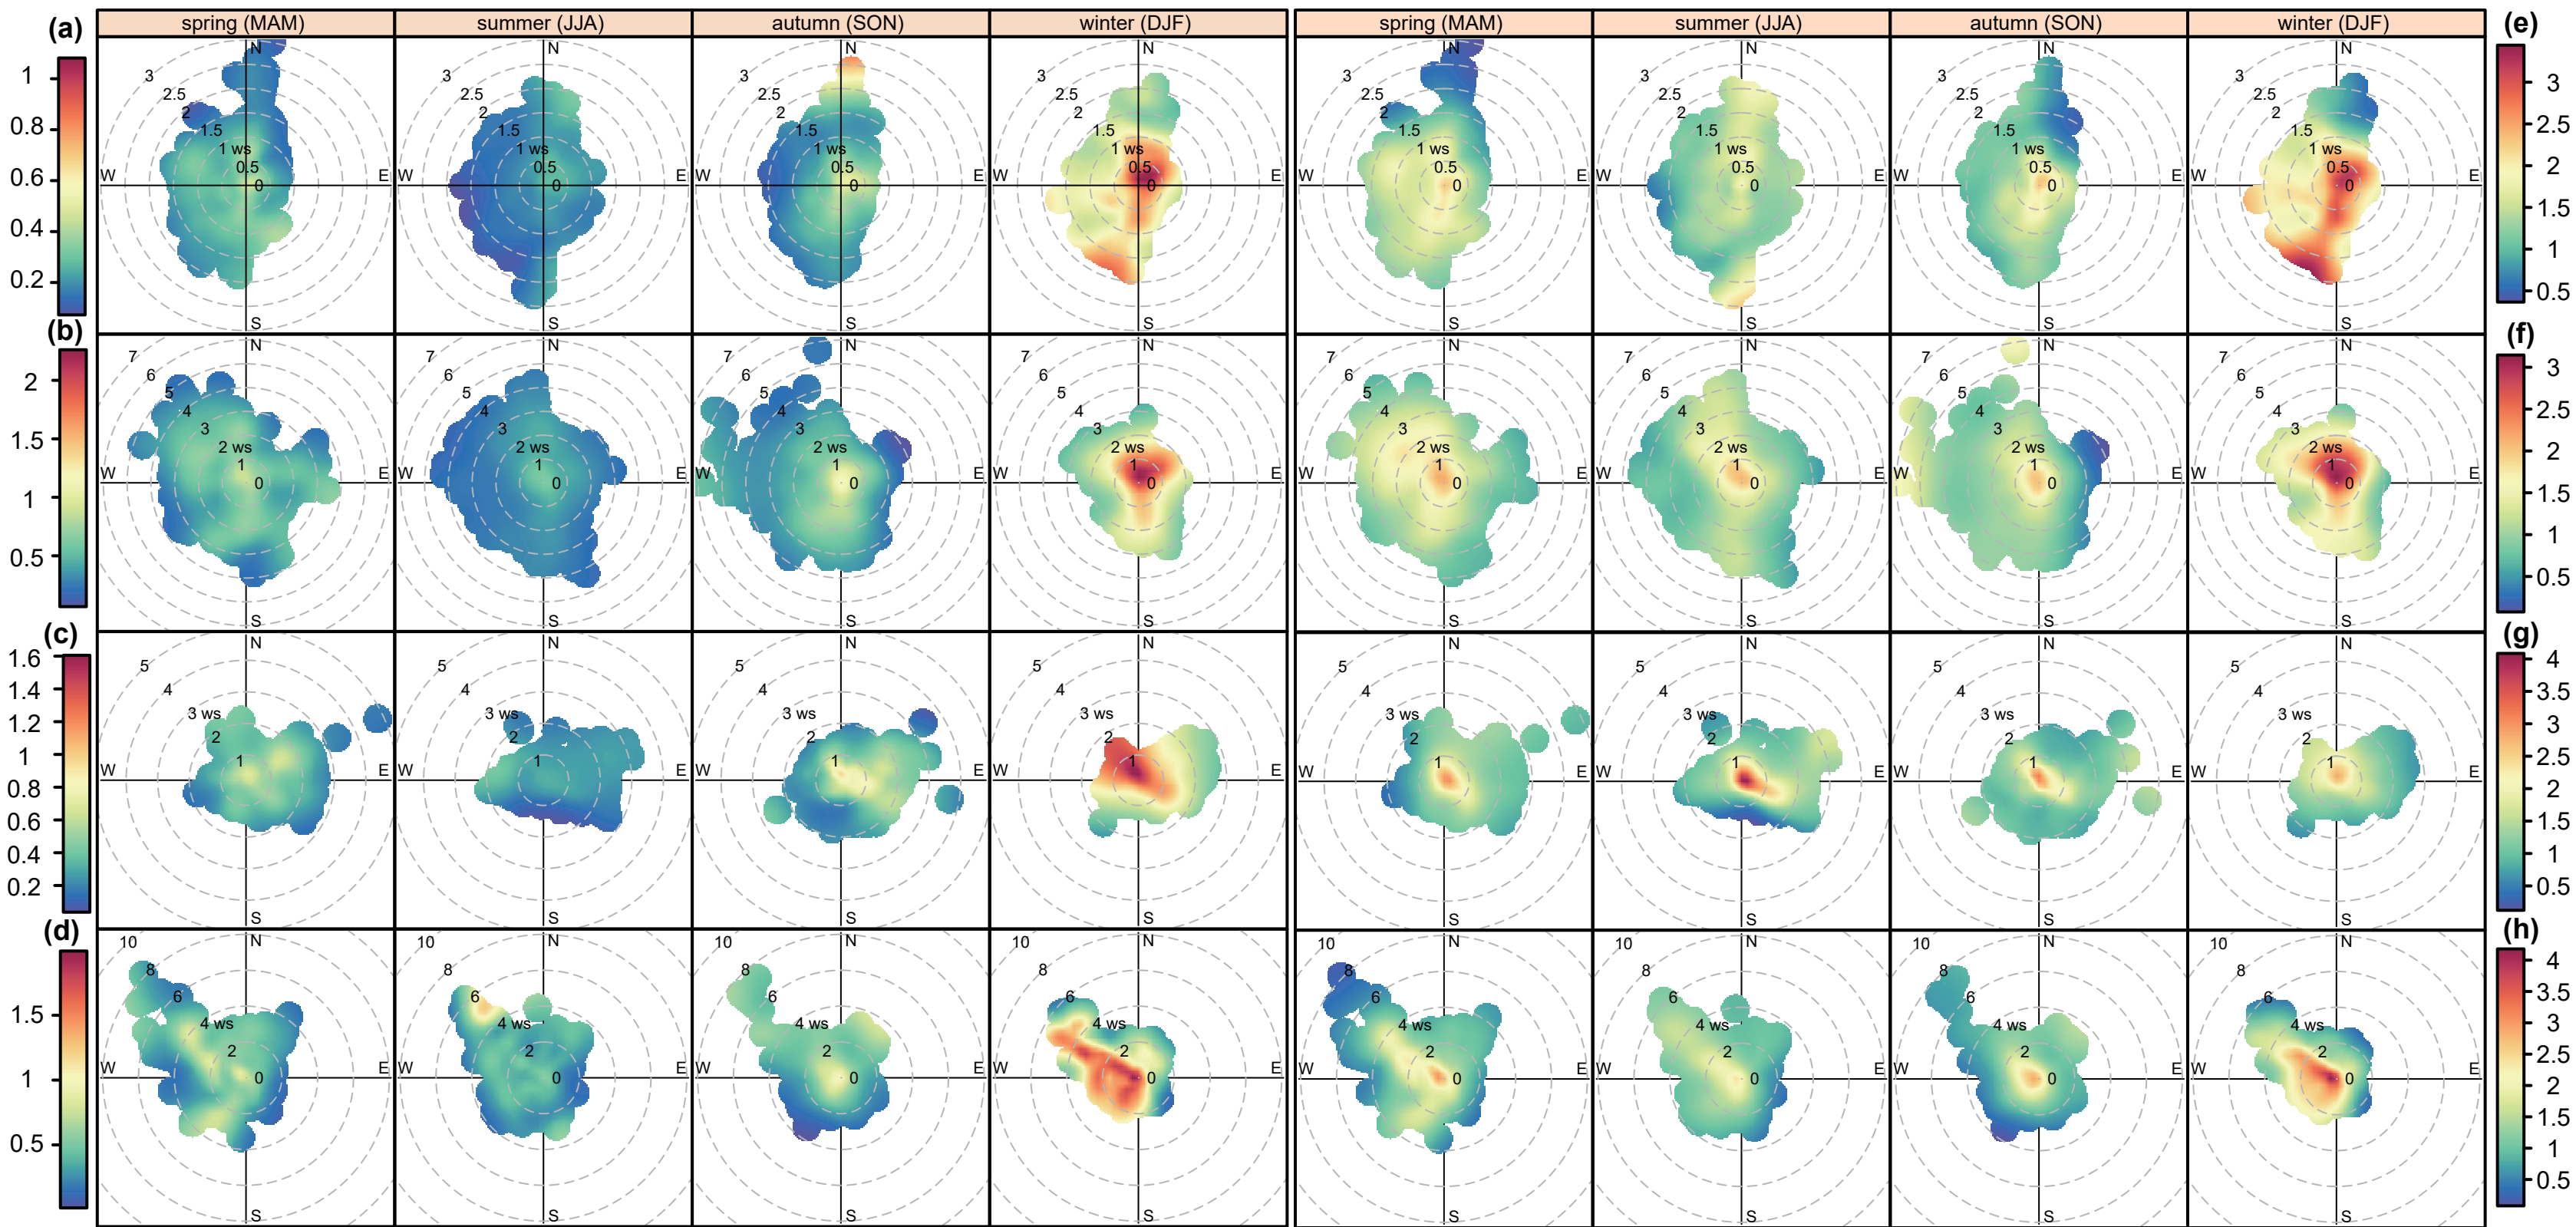

Supplement: d6ea00019c7.pdf [file d6ea00019c7.pdf]

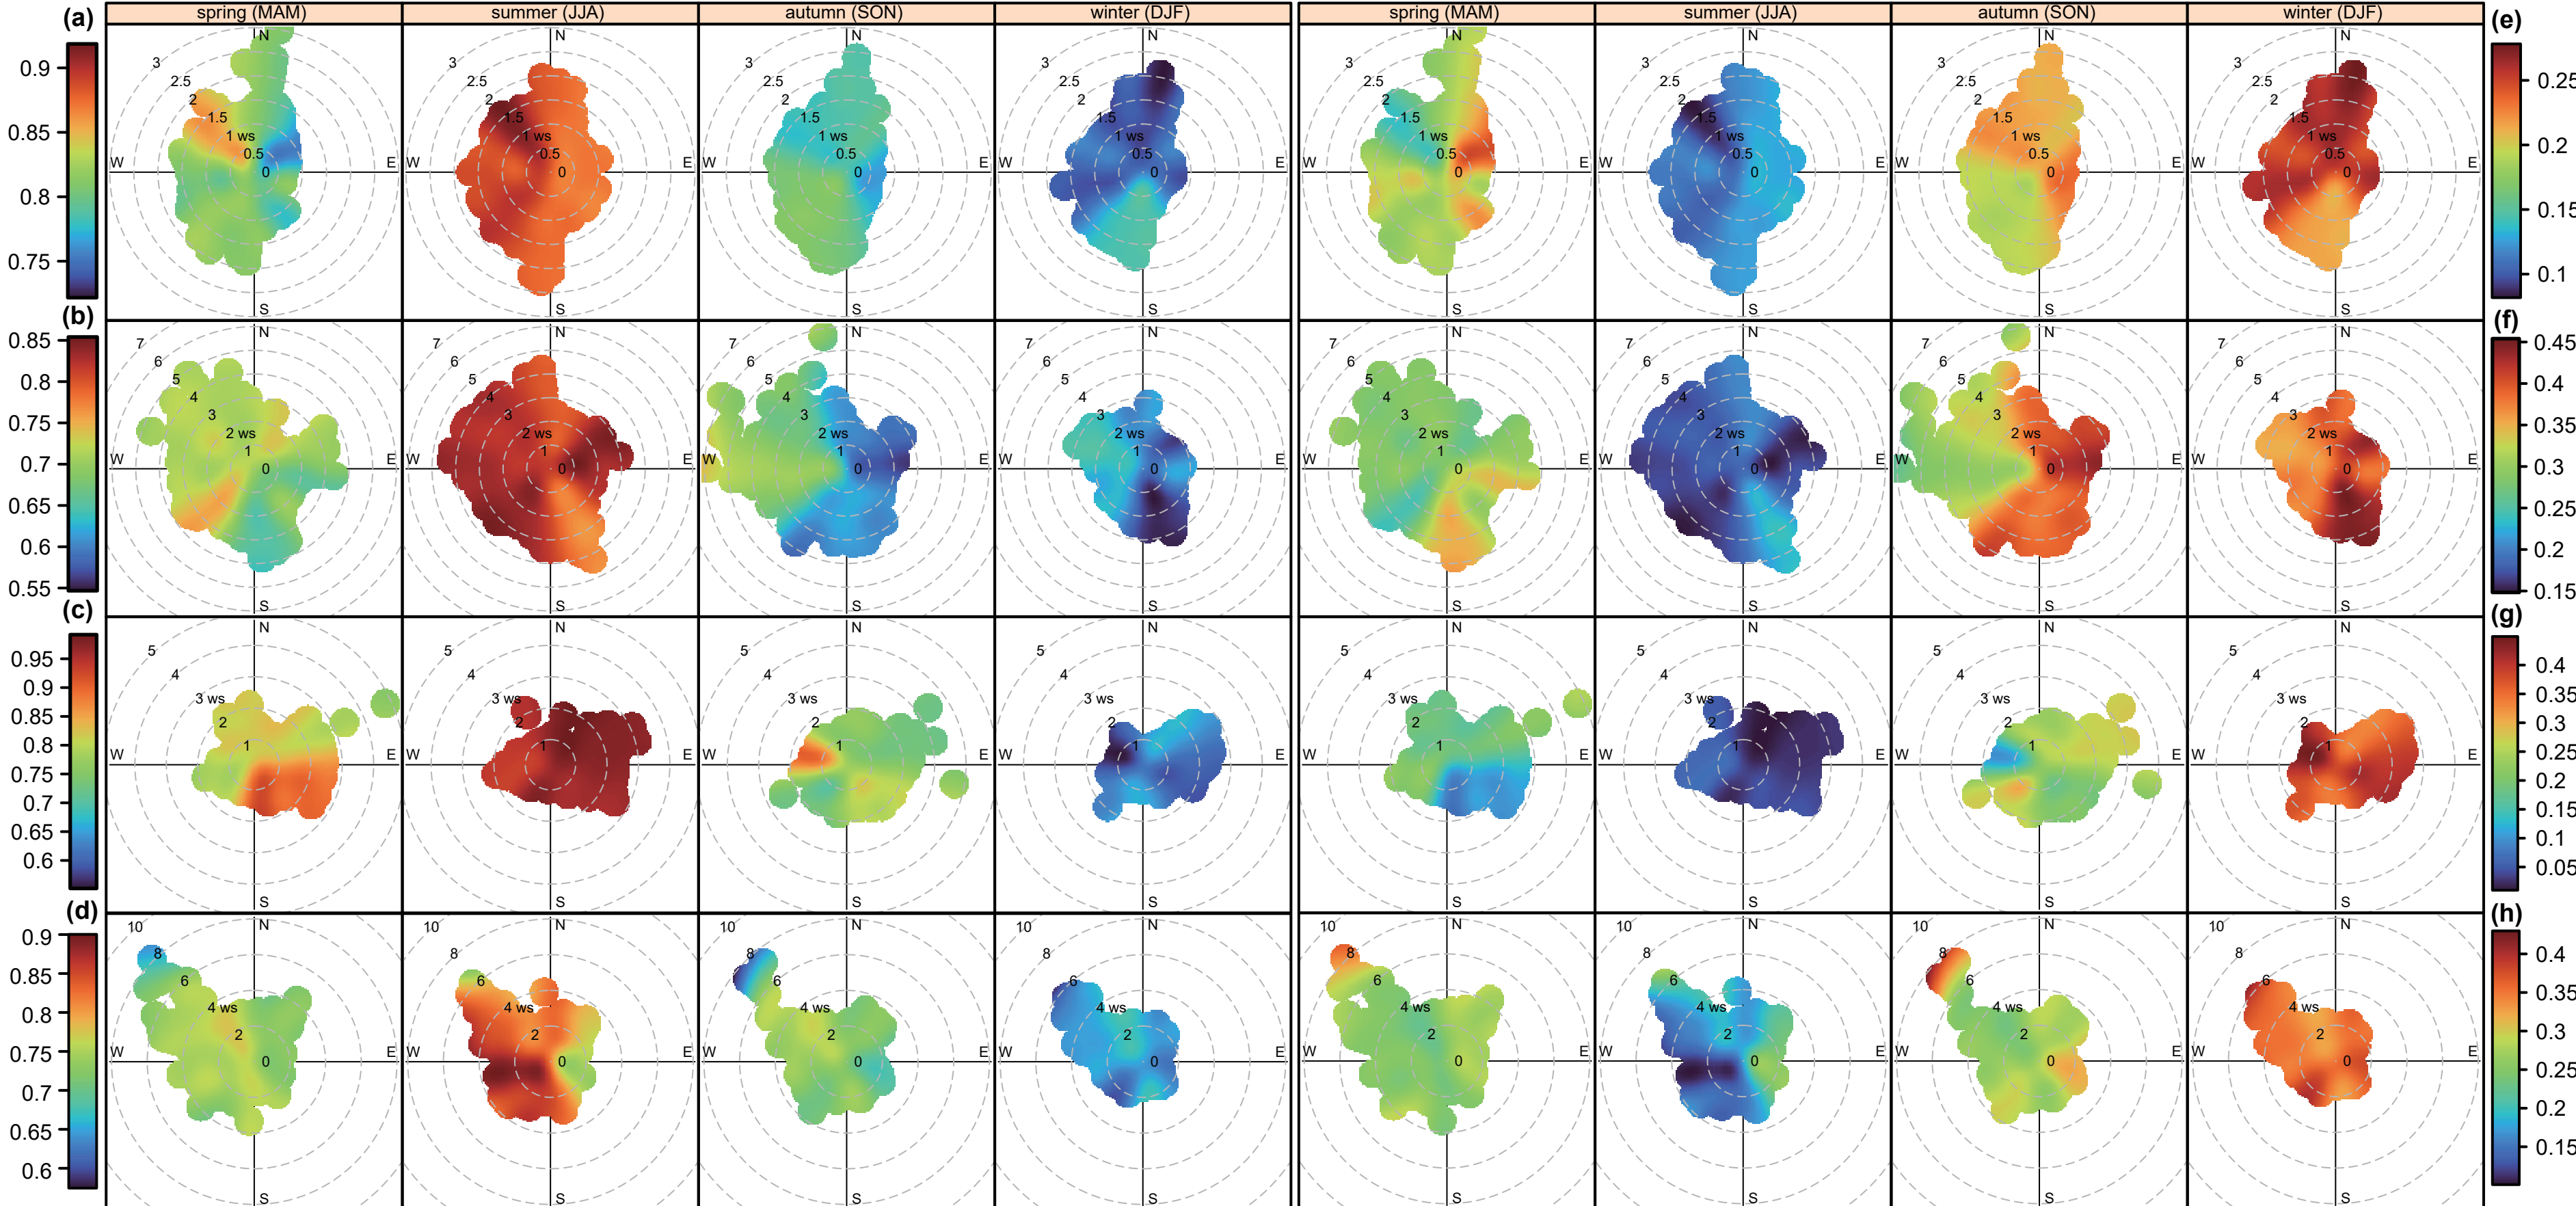

Supplement: d6ea00019c8.pdf [file d6ea00019c8.pdf]

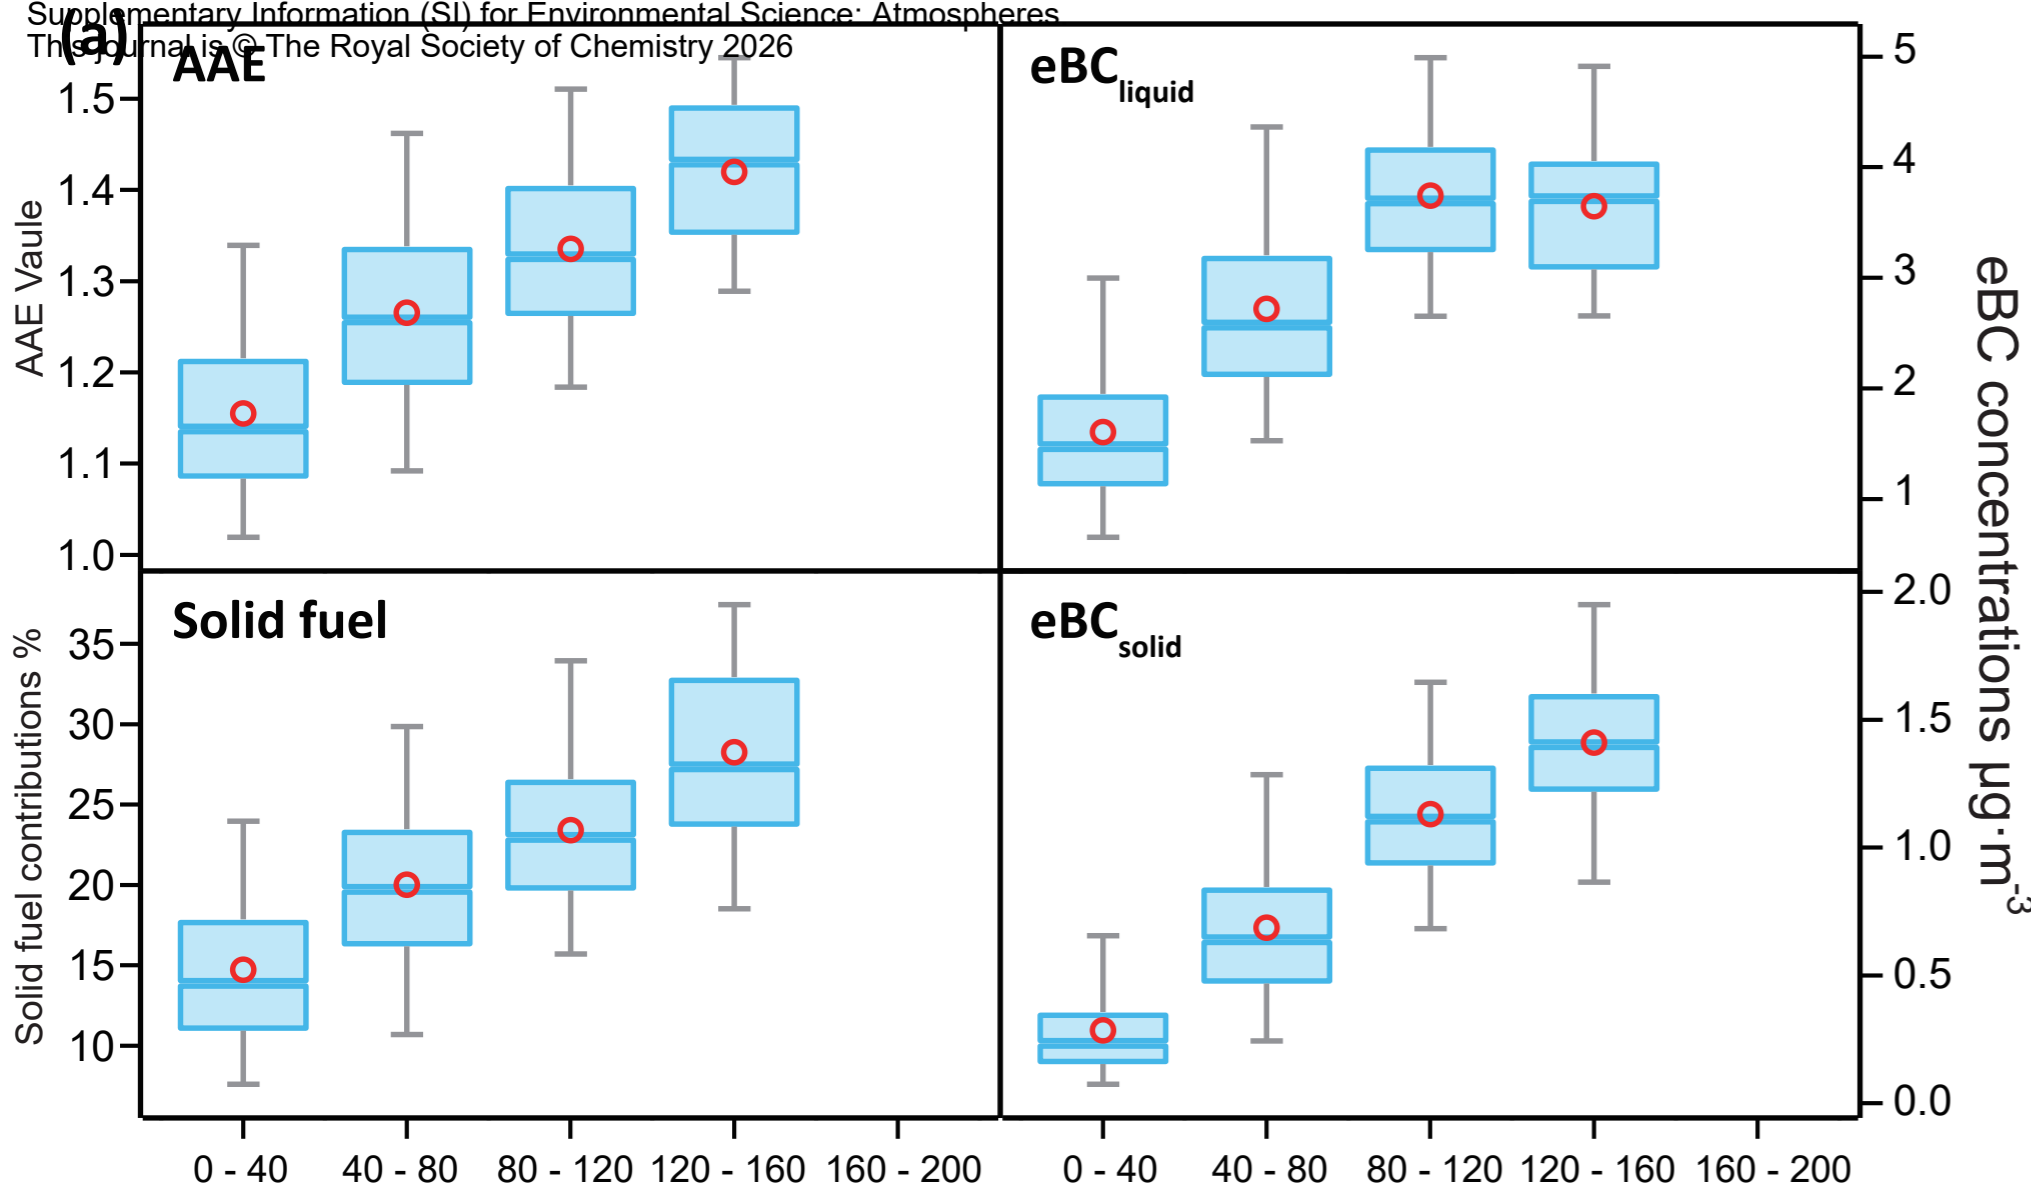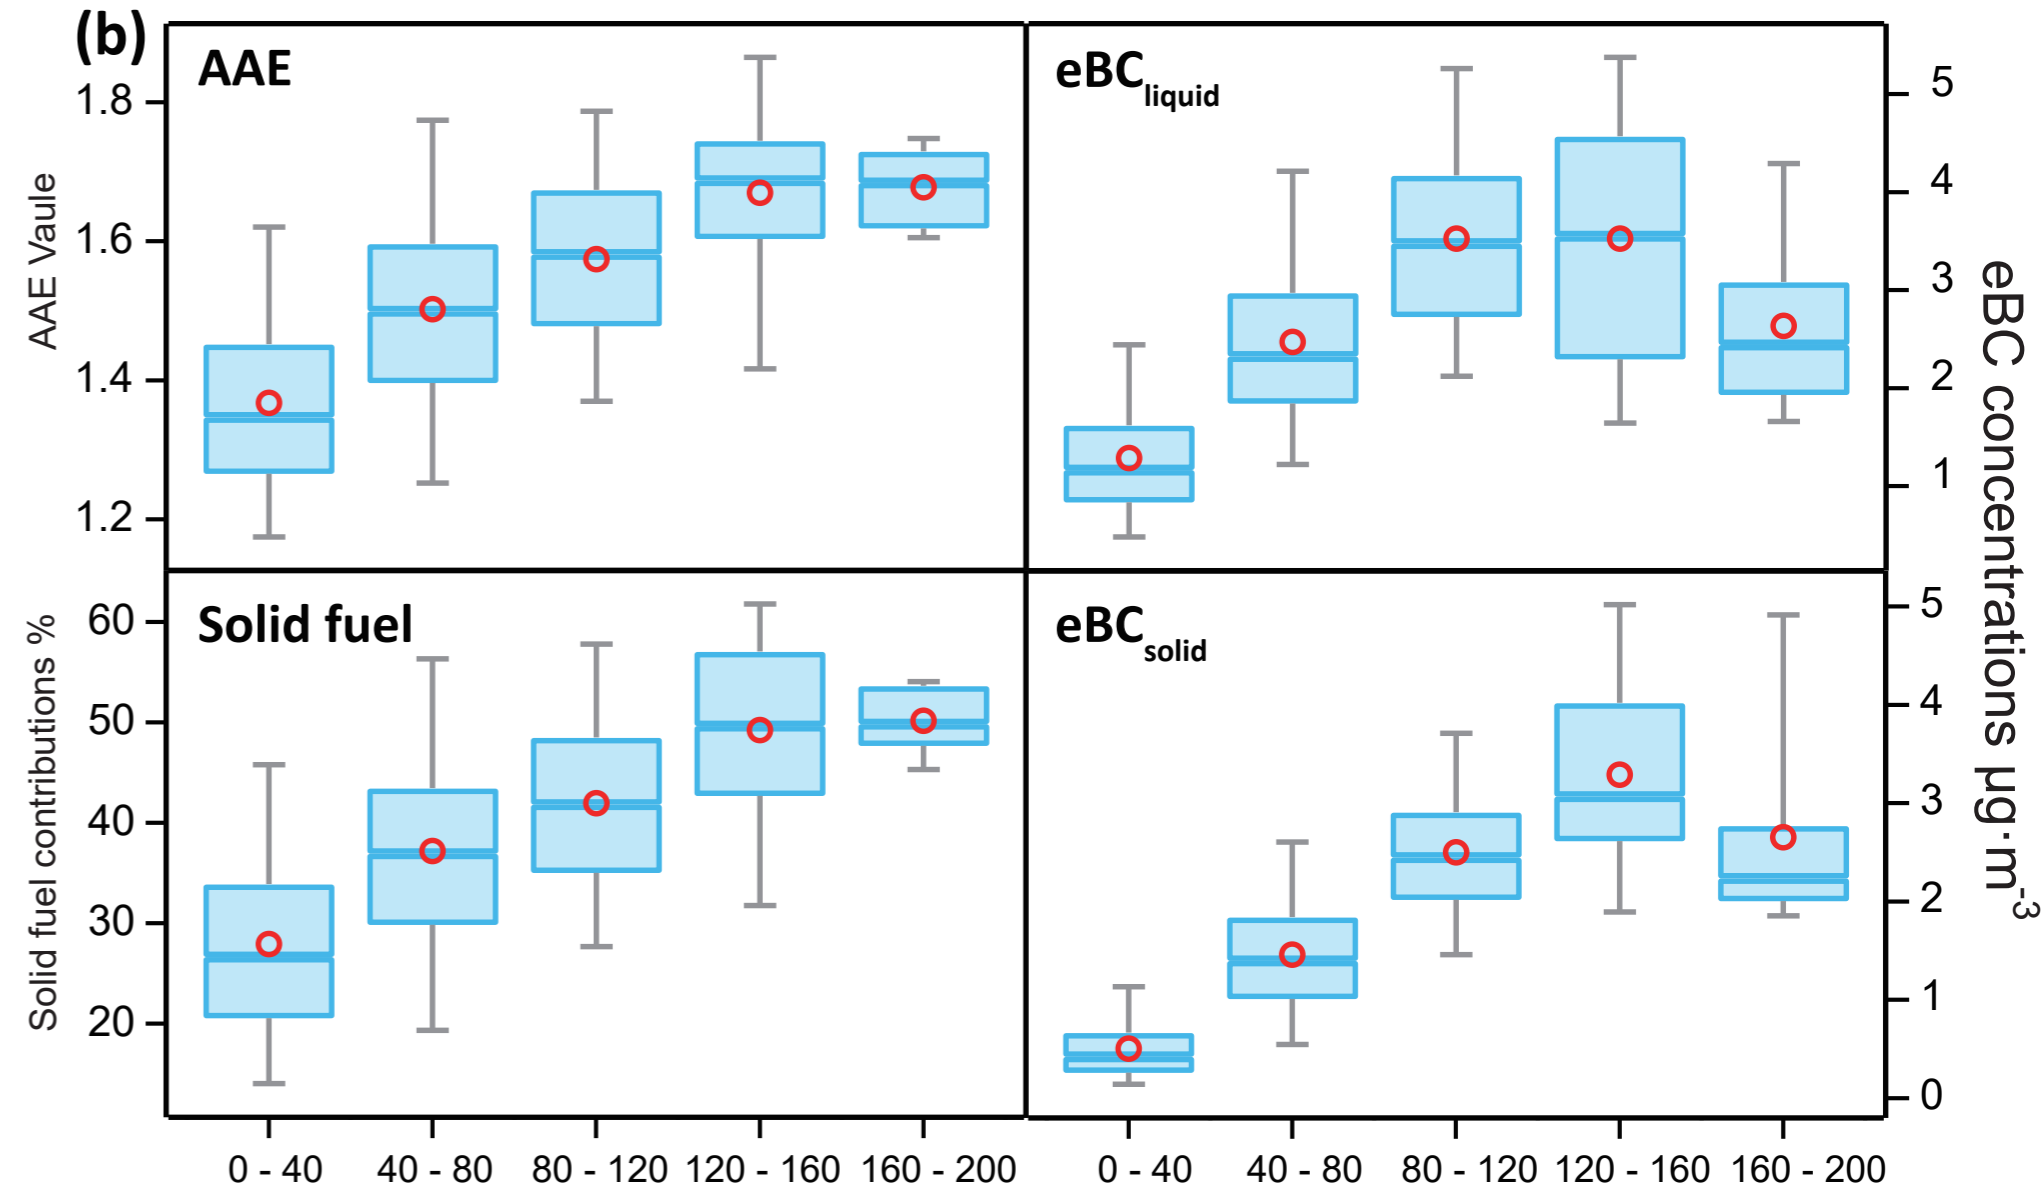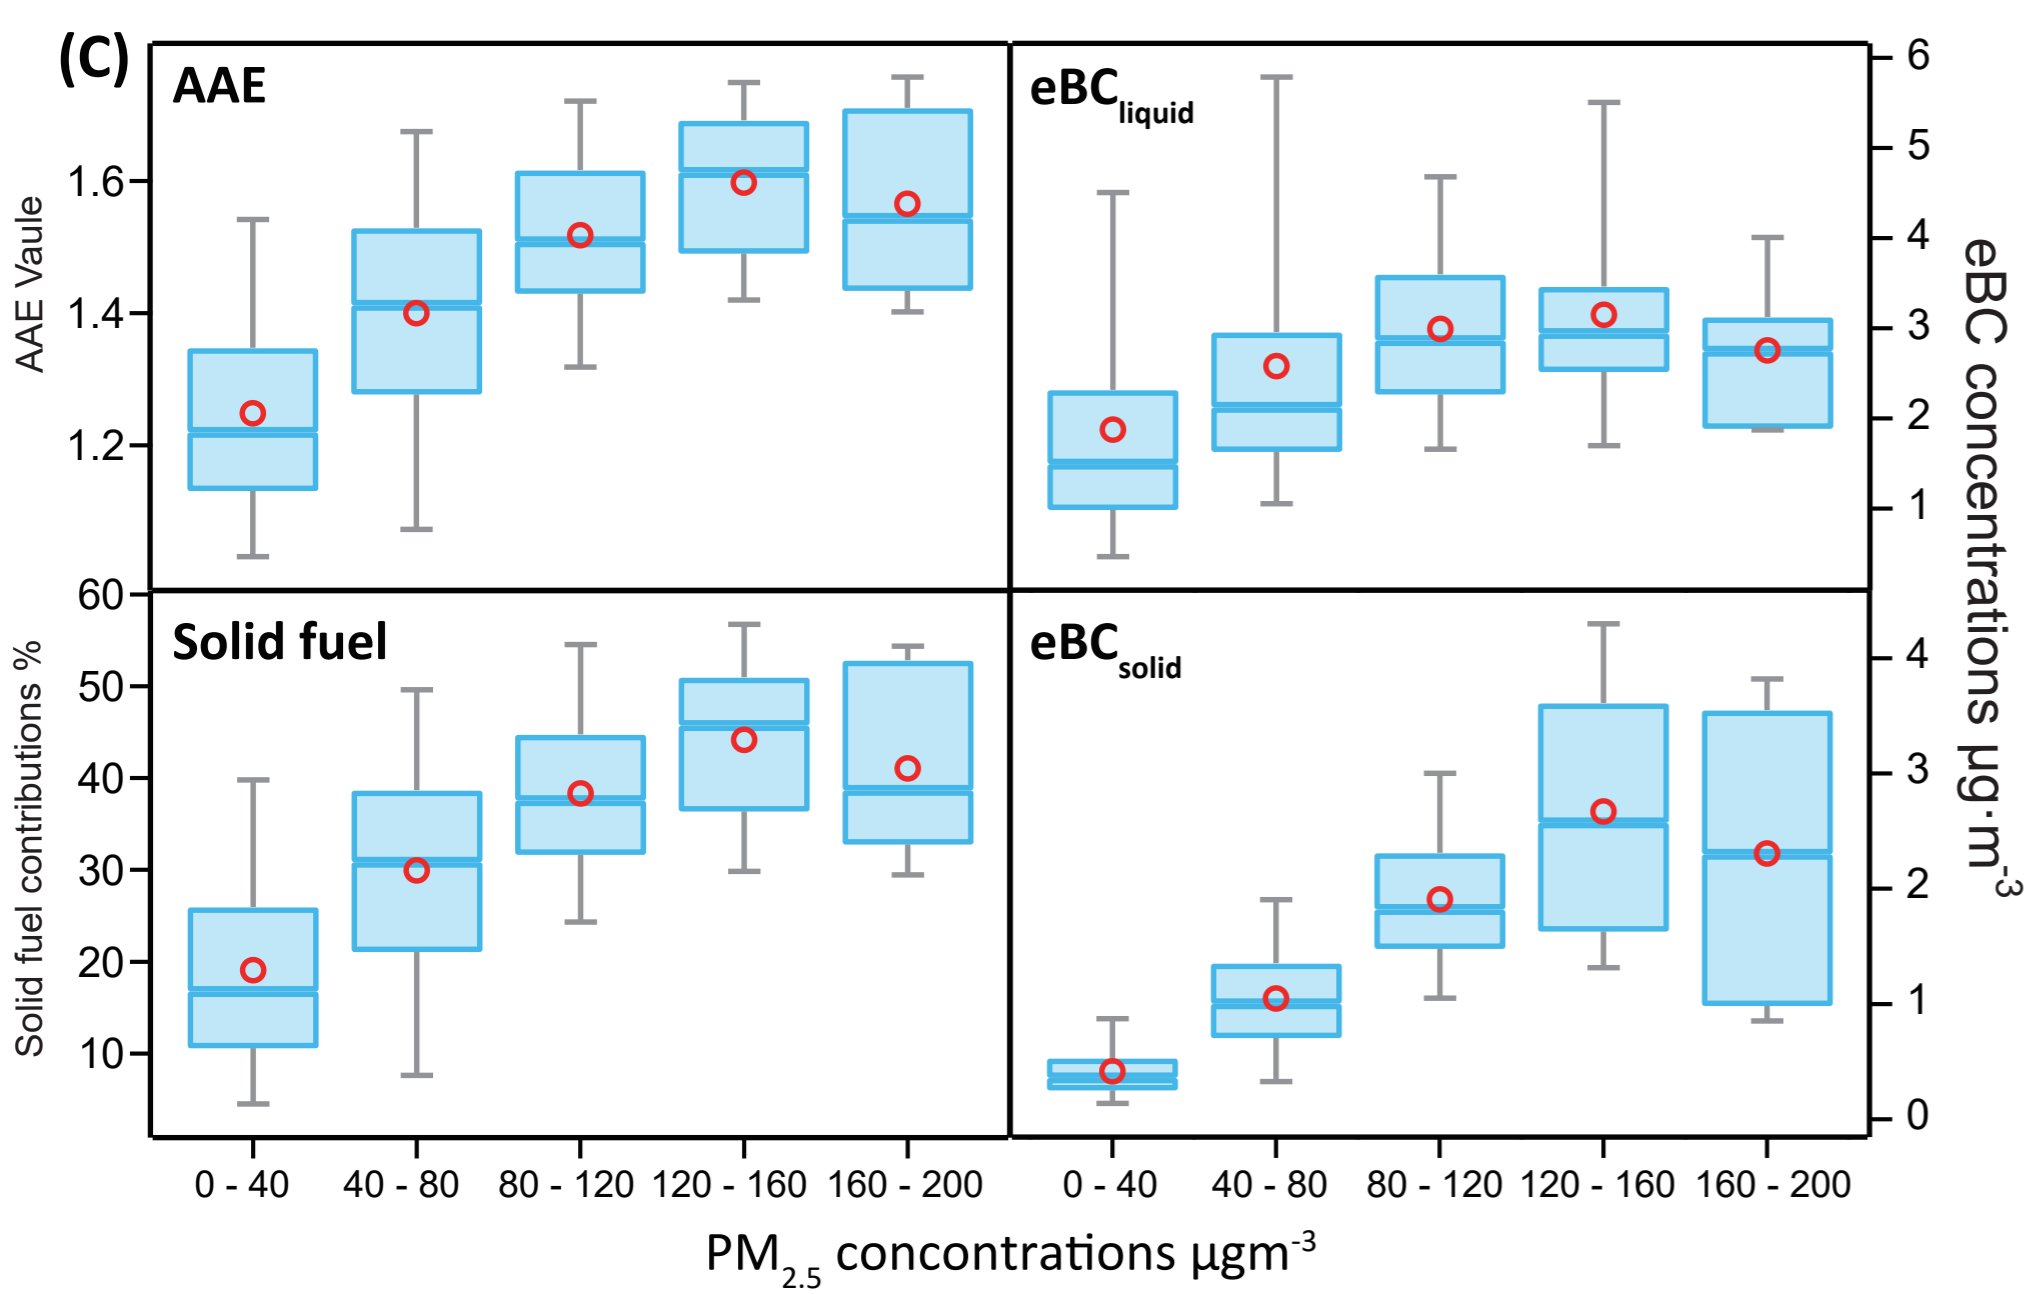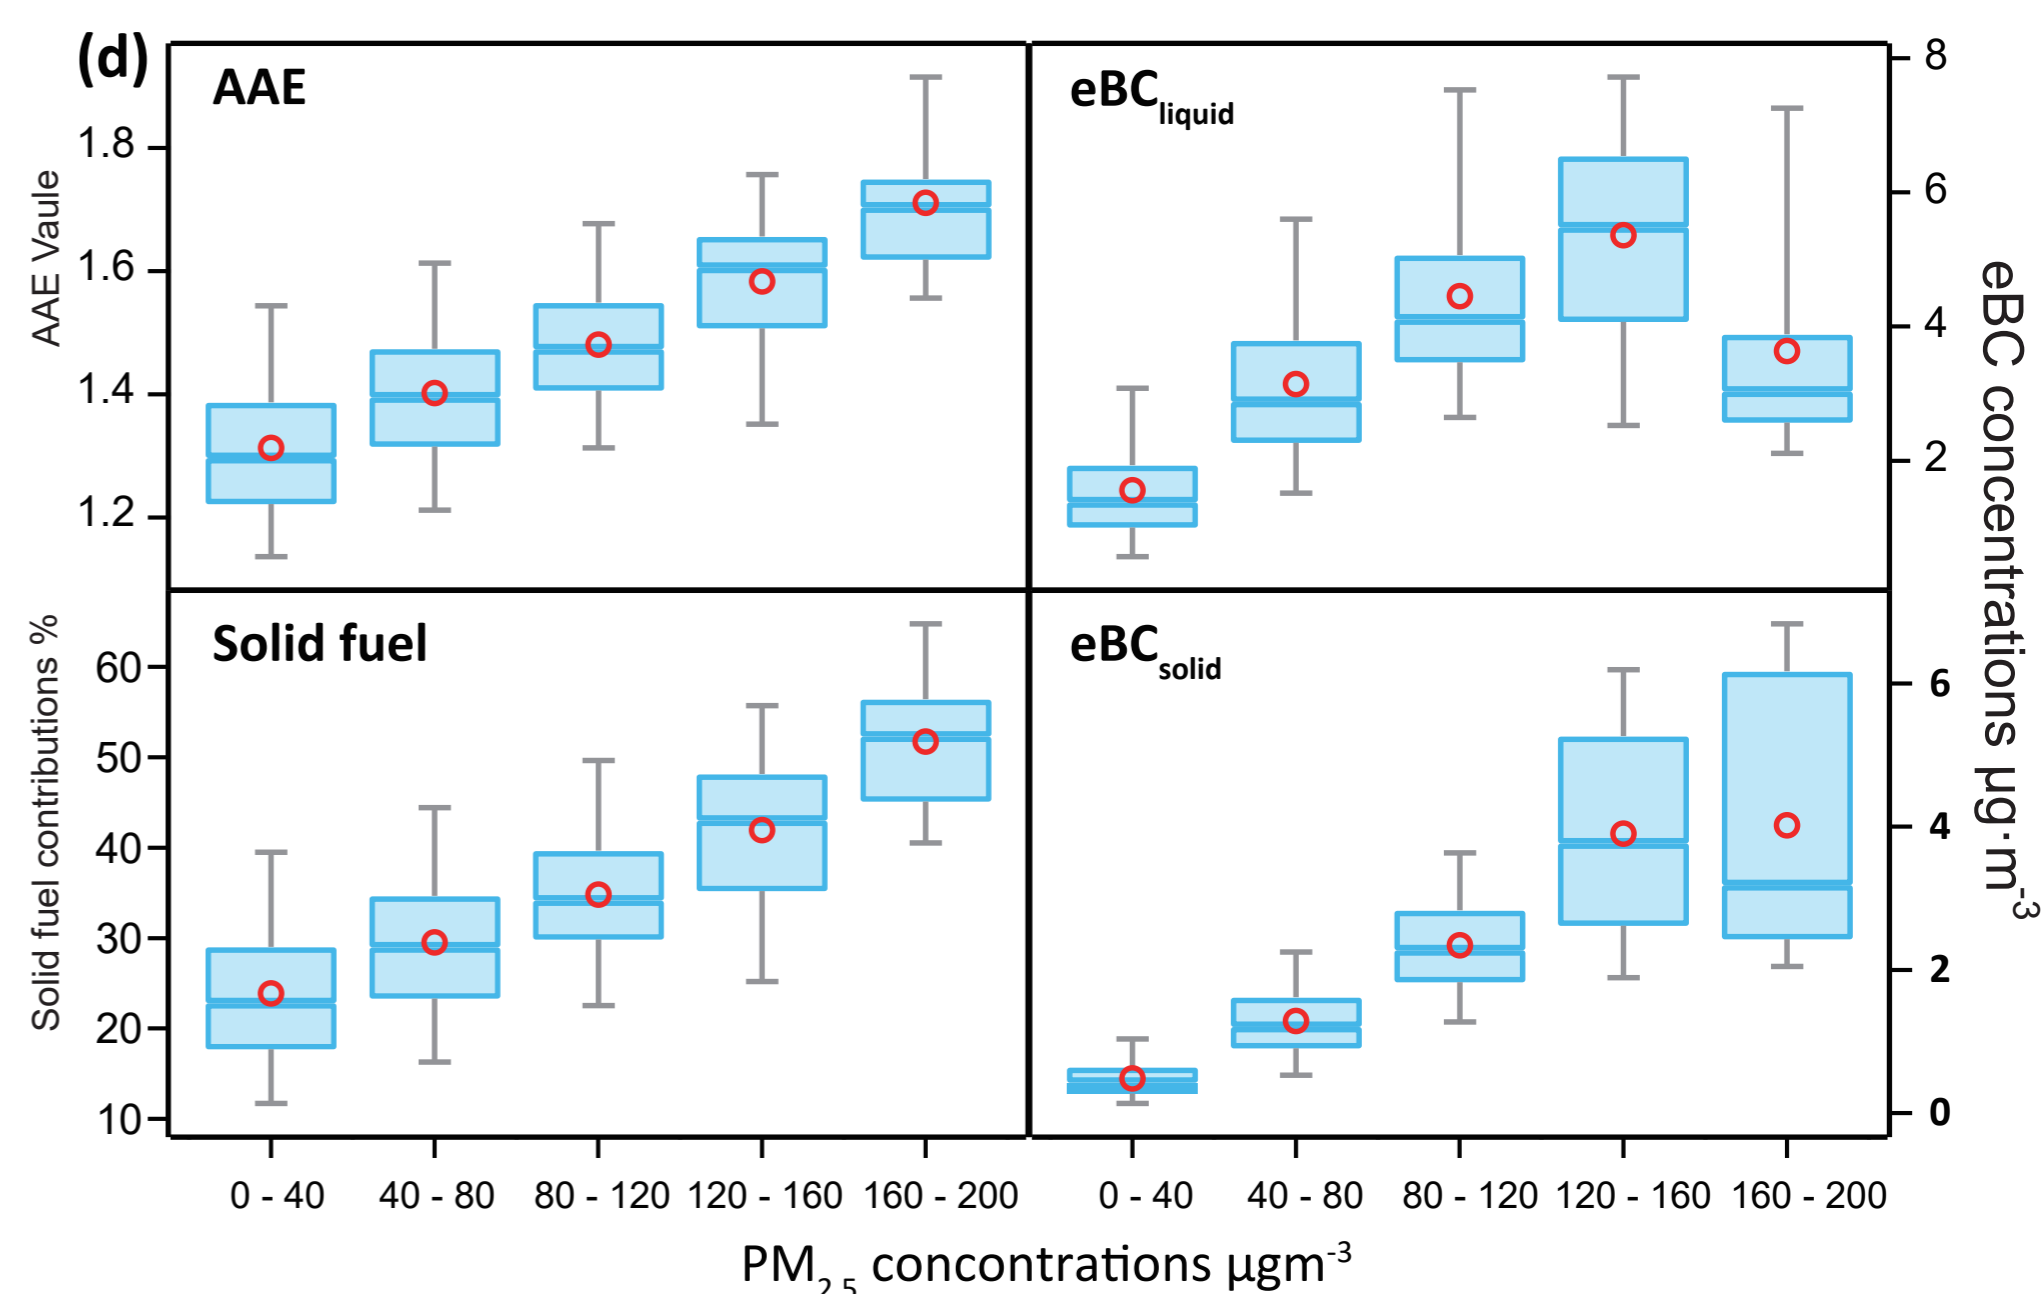

Supplement: d6ea00019c9.pdf [file d6ea00019c9.pdf]
